# Supplementary material
Source: PubMed Central journal article supplement (PMC3755638)
Supplement: NIHMS502341-supplement-1_si_001.pdf [file NIHMS502341-supplement-1_si_001.pdf]

## Supporting Information

### PRIMO: A Transferable Coarse-grained Force Field for Proteins

Parimal Kar<sup>1</sup>, Srinivasa Murthy Gopal<sup>1</sup>, Yi-Ming Cheng<sup>1</sup>, Alexander Predeus<sup>1</sup>, Michael Feig<sup>1,2\*</sup>

<sup>1</sup>Department of Biochemistry and Molecular Biology and <sup>2</sup>Department of Chemistry, Michigan State University, East Lansing, MI 48824, USA

**Keywords:** Coarse-grain, force field, implicit solvent, molecular dynamics, replica exchange

\*Corresponding author:

Email: [feig@msu.edu](mailto:feig@msu.edu)

Phone: +1 (517) 432-7439

Fax: +1 (517) 353-9334.

Table S1: The mapping between all-atom and PRIMO CG levels.

| Residues | PRIMO |       | CHARMM     |
|----------|-------|-------|------------|
|          | NAME  | TYPE  | ATOM       |
| ACE      | COY   | COY   | CY OY      |
|          | SCT   | SCT3  | CAY        |
| CT3      | NTT   | NTT   | NT         |
|          | SNT   | SCT3  | CAT        |
| ALA      | SC1   | SC1A  | CB         |
| ARG      | SC1   | SC1R  | CB CG      |
|          | SC2   | SC2R  | CD         |
|          | SC3   | SC3R  | NE         |
|          | SC4   | SC4R  | NH1        |
|          | SC5   | SC4R  | NH2        |
| ASP      | SC1   | SC1D  | CB         |
|          | SC2   | SC2D  | CG OD1     |
|          | SC3   | SC2D  | CG OD2     |
| ASN      | SC1   | SC1N  | CB         |
|          | SC2   | SC2N  | CG OD1     |
|          | SC3   | SC3N  | ND2        |
| CYS      | SC1   | SC1C  | CB SG      |
| GLN      | SC1   | SC1Q  | CB CG      |
|          | SC2   | SC2Q  | CD OE1     |
|          | SC3   | SC3Q  | NE2        |
| GLU      | SC1   | SC1E  | CB CG      |
|          | SC2   | SC2E  | CD OE1     |
|          | SC3   | SC2E  | CD OE2     |
| HSD      | SC1   | SC1H  | CB CG      |
|          | SC2   | SC2HD | ND1        |
|          | SC3   | SC3HD | NE2        |
| HSE      | SC1   | SC1H  | CB CG      |
|          | SC2   | SC2HE | ND1        |
|          | SC3   | SC3HE | NE2        |
| ILE      | SC1   | SC1I  | CB CG1 CG2 |
|          | SC2   | SC2I  | CD         |
| LEU      | SC1   | SC1L  | CB         |
|          | SC2   | SC2L  | CG CD1     |
|          | SC3   | SC2L  | CG CD2     |
| LYS      | SC1   | SC1K  | CB CG      |
|          | SC2   | SC2K  | CD         |
|          | SC3   | SC3K  | CE         |
|          | SC4   | SC4K  | NZ         |
| MET      | SC1   | SC1M  | CB CG      |
|          | SC2   | SC2M  | SD         |
|          | SC3   | SC3M  | CE         |

|     |     |      |          |
|-----|-----|------|----------|
| PHE | SC1 | SC1F | CB CG    |
|     | SC2 | SC2F | CE1      |
|     | SC3 | SC2F | CE2      |
| PRO | SC1 | SC1P | CB CG CD |
| SER | SC1 | SC1S | CB OG    |
| THR | SC1 | SC1T | CG OG1   |
|     | SC2 | SC2T | CG2      |
| TRP | SC1 | SC1W | CB CG    |
|     | SC2 | SC2W | NE1      |
|     | SC3 | SC3W | CE3      |
|     | SC4 | SC4W | CZ2      |
| TYR | SC1 | SC1Y | CB CG    |
|     | SC2 | SC2Y | CE1      |
|     | SC3 | SC2Y | CE2      |
|     | SC4 | SC4Y | OH       |
| VAL | SC1 | SC1V | CB CG1   |
|     | SC2 | SC1V | CB CG2   |

Table S2: List of virtual atom constructions and the associated interaction potentials. Following the nomenclature in the main text, virtual atoms are suffixed by an asterisk (\*). # indicates a CG particle of the next residue. All interactions are harmonic with a spring constant ( $k_b$ ) of 10.0 kcal/(mol Å<sup>2</sup>) and  $k_\theta$  of 5.0 kcal/(mol rad<sup>2</sup>) for bonds and angles respectively. A virtual atom A is constructed using either Scheme I or Scheme II. Scheme I refers to a construction of an atom A, using the A-B bond, the A-B-C angle and the dihedral A-B-C-D as input. In scheme II, an atomic site B, is obtained from a CG site located at the midpoint AB by extrapolation from A. For a more detailed discussion of the above methods, the reader is referred to refs 1 and 2.

| Residue            | Construction of Virtual atoms |                     |                                             | Potential |                    |          |
|--------------------|-------------------------------|---------------------|---------------------------------------------|-----------|--------------------|----------|
|                    | Virtual Atoms                 | Construction Method | CG /Virtual particles used for construction | Type      | Particles Involved | Minima   |
| ALL Except Gly/Pro | C*                            | I                   | CO, N1 <sup>#</sup> , CA1                   | Bond      | N1, C*             | 2.480 Å  |
|                    |                               |                     |                                             | Angle     | N1, C*, CO         | 113.000° |
| Gly                | C*                            | I                   | CO, N1 <sup>#</sup> , CA1                   | Bond      | N1, C*             | 2.510 Å  |
|                    |                               |                     |                                             | Angle     | N1, C*, CO         | 115.000° |
| Pro                | C*                            | I                   | CO, N1 <sup>#</sup> , CA1                   | Bond      | N1, C*             | 2.530 Å  |
|                    |                               |                     |                                             | Angle     | N1, C*, CO         | 116.000° |
| Arg                | Cβ*                           | I                   | CA1, N1, C*                                 | Bond      | SC1, Cβ*           | 0.770 Å  |
|                    |                               |                     |                                             | Angle     | CA1, Cβ*, SC1      | 114.5°   |
|                    | Cγ*                           | II                  | Cβ*, SC1                                    | Bond      | SC1, Cγ*           | 1.540    |
|                    |                               |                     |                                             | Angle     | SC1, Cγ*, SC2      | 113.5°   |
|                    | Cζ*                           | I                   | SC3, SC5, SC4                               | Angle     | SC3, Cζ*, SC2      | 124.285° |
| Asn                | Cγ*                           | I                   | SC1, SC3, SC2                               | Angle     | SC1, Cγ*, CA1      | 111.020° |
| Asp                | Cγ*                           | I                   | SC1, SC2, SC3                               | Angle     | SC1, Cγ*, CA1      | 111.010° |
| Cys                | Cβ*                           | I                   | CA1, N1, C*                                 | Bond      | SC1, Cβ*           | 0.915 Å  |
|                    |                               |                     |                                             | Angle     | CA1, Cβ*, SC1      | 113.000° |
| Gln                | Cβ*                           | I                   | CA1, N1, C*                                 | Bond      | SC1, Cβ*           | 0.775 Å  |
|                    |                               |                     |                                             | Angle     | CA1, Cβ*, SC1      | 114.500° |



|         |              |    |                   |       |                         |          |
|---------|--------------|----|-------------------|-------|-------------------------|----------|
| Glu     | C $\beta^*$  | I  | CA1, N1, C*       | Bond  | SC1, C $\beta^*$        | 0.775 Å  |
|         |              |    |                   | Angle | CA1, C $\beta^*$ , SC1  | 114.500° |
|         | C $\gamma^*$ | II | C $\beta^*$ , SC2 | Bond  | SC2, C $\gamma^*$       | 1.960 Å  |
|         |              |    |                   | Bond  | SC3, C $\gamma^*$       | 1.960 Å  |
| Hsd/Hse | C $\beta^*$  | I  | CA1, N1, C*       | Bond  | SC1, C $\beta^*$        | 0.755 Å  |
|         |              |    |                   | Angle | CA1, C $\beta^*$ , SC1  | 114.5°   |
|         | C $\gamma^*$ | II | C $\beta^*$ , SC1 | Bond  | SC2, C $\gamma^*$       | 1.380    |
|         |              |    |                   | Angle | SC1, C $\gamma^*$ , SC2 | 123.780° |
| Ile     | C $\beta^*$  | I  | CA1, N1, C*       | Bond  | SC2, C $\beta^*$        | 2.580 Å  |
|         |              |    |                   | Angle | CA1, C $\beta^*$ , SC1  | 129.490° |
| Leu     | C $\gamma^*$ | I  | SC1, SC2, SC3     | Bond  | CA1, C $\gamma^*$       | 2.620 Å  |
|         |              |    |                   | Angle | SC1, C $\gamma^*$ , CA1 | 115.530° |
| Lys     | C $\beta^*$  | I  | CA1, N1, C*       | Bond  | SC1, C $\beta^*$        | 0.775 Å  |
|         |              |    |                   | Angle | CA1, C $\beta^*$ , SC1  | 112.000° |
|         | C $\gamma^*$ | II | C $\beta^*$ , SC1 | Bond  | SC2, C $\gamma^*$       | 1.540    |
|         |              |    |                   | Angle | SC1, C $\gamma^*$ , SC2 | 112.700° |
| Met     | C $\beta^*$  | I  | CA1, N1, C*       | Bond  | SC1, C $\beta^*$        | 0.775 Å  |
|         |              |    |                   | Angle | CA1, C $\beta^*$ , SC1  | 115.000° |
|         | C $\gamma^*$ | II | C $\beta^*$ , SC1 | Bond  | SC1, C $\gamma^*$       | 1.820    |
|         |              |    |                   | Angle | SC1, C $\gamma^*$ , SC2 | 114.130° |
| Phe     | C $\beta^*$  | I  | CA1, N1, C*       | Bond  | SC1, C $\beta^*$        | 0.775 Å  |
|         |              |    |                   | Angle | CA1, C $\beta^*$ , SC1  | 112.000° |
|         | C $\gamma^*$ | II | C $\beta^*$ , SC1 | Bond  | SC1, C $\gamma^*$       | 2.440    |
|         |              |    |                   | Angle | SC1, C $\gamma^*$ , SC3 | 149.800° |
| Pro     | C $\beta^*$  | I  | CA1, N1, C*       | Bond  | SC1, C $\beta^*$        | 1.240 Å  |
|         |              |    |                   | Angle | CA1, C $\beta^*$ , SC1  | 84.605°  |
| Ser     | C $\beta^*$  | I  | CA1, N1, C*       | Bond  | SC1, C $\beta^*$        | 0.715 Å  |

|     |              |    |                   |       |                         |          |
|-----|--------------|----|-------------------|-------|-------------------------|----------|
|     |              |    |                   | Angle | CA1, C $\beta^*$ , SC1  | 108.610° |
| Thr | C $\beta^*$  | I  | CA1, N1, C*       | Bond  | SC1, C $\beta^*$        | 0.710 Å  |
|     |              |    |                   | Angle | CA1, C $\beta^*$ , SC1  | 108.630° |
| Trp | C $\beta^*$  | I  | CA1, N1, C*       | Bond  | SC1, C $\beta^*$        | 0.775 Å  |
|     |              |    |                   | Angle | CA1, C $\beta^*$ , SC1  | 115.650° |
|     | C $\gamma^*$ | II | C $\beta^*$ , SC1 | Bond  | SC1, C $\gamma^*$       | 2.240    |
|     |              |    |                   | Angle | SC1, C $\gamma^*$ , SC2 | 160.450° |
| Tyr | C $\beta^*$  | I  | CA1, N1, C*       | Bond  | SC1, C $\beta^*$        | 0.775 Å  |
|     |              |    |                   | Angle | CA1, C $\beta^*$ , SC1  | 112.000° |
|     | C $\gamma^*$ | II | C $\beta^*$ , SC1 | Bond  | SC1, C $\gamma^*$       | 2.440    |
|     |              |    |                   | Angle | SC1, C $\gamma^*$ , SC3 | 149.800° |
| Val | C $\beta^*$  | I  | CA1, SC1, SC2     | Bond  | SC1, C $\beta^*$        | 0.770 Å  |
|     |              |    |                   |       | SC2, C $\beta^*$        | 0.770 Å  |
|     |              |    |                   | Angle | CA1, C $\beta^*$ , N1   | 111.900° |

Table S3: Average solvent-accessible surface areas (SASA) obtained from PRIMO and CHARMM simulations in comparison with SASA values of PDB structures. Standard deviations are provided in the parentheses.

| PDB  | PRIMO ( $\text{\AA}^2$ ) | CHARMM ( $\text{\AA}^2$ ) | PDB ( $\text{\AA}^2$ ) |
|------|--------------------------|---------------------------|------------------------|
| 1VII | 3127.4 (88.7)            | 3232.3 (111.2)            | 3183.3                 |
| 3GB1 | 4289.2 (92.6)            | 3853.8 (81.5)             | 3888.5                 |
| 1BDD | 3748.1 (95.9)            | 3568.3 (91.7)             | 3332.6                 |
| 1D3Z | 5209.0 (129.1)           | 5074.7 (82.0)             | 4965.7                 |
| 2PTL | 4647.9 (145.4)           | 4335.8 (84.7)             | 4095.7                 |
| 1BTA | 5723.0 (132.1)           | 5466.3 (111.9)            | 5341.1                 |
| 1FKS | 6750.0 (183.0)           | 6718.5 (230.0)            | 6561.6                 |
| 1A2P | 7004.6 (158.1)           | 6241.1 (117.5)            | 5994.2                 |
| 2AAS | 7555.0 (182.0)           | 7440.9 (188.9)            | 6580.2                 |
| 1CYE | 7100.8 (151.8)           | 7010.5 (115.7)            | 6189.5                 |
| 2RN2 | 9894.4 (208.3)           | 8839.6 (207.6)            | 8492.0                 |

Table S4:  $C_{\alpha}$  RMSD obtained from PRIMO-MD simulations with OPEP4-MD simulations.

Standard deviations are provided in the parentheses.

| PDB  | $C_{\alpha}$ RMSD<br>(PRIMO)<br>(Å) | $C_{\alpha}$ RMSD<br>(OPEP)<br>(Å) | rigid core                   |
|------|-------------------------------------|------------------------------------|------------------------------|
| 1GYZ | 3.7 (0.5)                           | 3.5 (0.2)                          | 60-86, 92-115                |
| 2DA1 | 4.4 (0.8)                           | 3.2 (0.4)                          | 16-63                        |
| 1FAF | 3.4 (0.5)                           | 3.3 (0.1)                          | 5-41, 50-69                  |
| 1PRA | 3.8 (0.5)                           | 3.4 (0.4)                          | 1-63                         |
| 2VXD | 3.5 (0.5)                           | 3.4 (0.4)                          | 1-54                         |
| 1BW6 | 4.2 (0.5)                           | 3.6 (0.2)                          | 10-64                        |
| 1QHK | 3.5 (0.5)                           | 3.6 (0.2)                          | 6-13, 18-52                  |
| 1E0G | 3.7 (0.5)                           | 3.6 (0.3)                          | 2-47                         |
| 1CLB | 3.4 (0.5)                           | 2.9 (0.2)                          | 3-14, 20-39, 47-53, 60-73    |
| 1FCL | 3.0 (0.3)                           | 2.8 (0.3)                          | 3-55                         |
| 1PGB | 2.8 (0.7)                           | 3.3 (0.20)                         | 1-56                         |
| 1B75 | 3.5 (0.7)                           | 2.9 (0.2)                          | 1-8, 26-31, 38-78, 88-92     |
| 2KTE | 6.1 (0.9)                           | 3.6 (0.4)                          | 1-36, 41-52, 62-105, 118-152 |
| 1E0L | 2.9 (0.5)                           | 2.1 (0.5)                          | 7-33                         |
| 2B86 | 2.8 (0.4)                           | 2.8 (0.3)                          | 3-14, 20-51, 57-58           |
| 1AFP | 2.9 (0.7)                           | 2.9 (0.2)                          | 1-16, 24-27, 37-51           |
| 1SHG | 3.2 (0.7)                           | 2.4 (0.3)                          | 8-11, 29-61                  |

Table S5: The efficiency of 1 ns simulations of 11 proteins with three different simulation methodologies. CPU times are provided in second (s). Speedups are provided in parentheses.

| PDB  | PRIMO (s) | CHARMM/GBMV<br>(s) | CHARMM/TIP3P (s) |
|------|-----------|--------------------|------------------|
| 1VII | 4116      | 41256 (10.0)       | 55548 (13.5)     |
| 3GB1 | 6510      | 63900 (9.8)        | 94536 (14.5)     |
| 1BDD | 5184      | 53208 (10.3)       | 61776 (11.9)     |
| 1D3Z | 9360      | 98712 (10.5)       | 188928 (20.2)    |
| 2PTL | 7162      | 70776 (9.9)        | 119592 (16.7)    |
| 1BTA | 10260     | 116856 (11.4)      | 94320 (9.2)      |
| 1FKS | 13536     | 135936 (10.0)      | 169272 (12.5)    |
| 1A2P | 12168     | 128232 (10.5)      | 135648 (11.2)    |
| 2AAS | 15048     | 147024 (9.8)       | 147456 (9.8)     |
| 1CYE | 16272     | 118440 (7.3)       | 169344 (10.4)    |
| 2RN2 | 19944     | 194112 (9.8)       | 238680 (12.0)    |

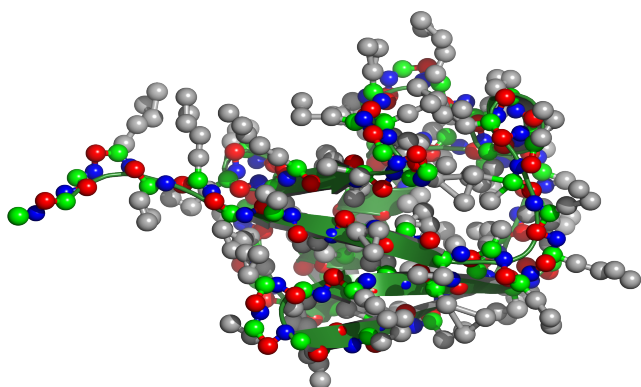

Figure S1: Ubiquitin (PDB ID: 1D3Z) in PRIMO representation together with a cartoon representation of the secondary structure. All side chain CG sites are shown as gray, the backbone is shown in color (green: CA1, blue: N1, and red: CO).

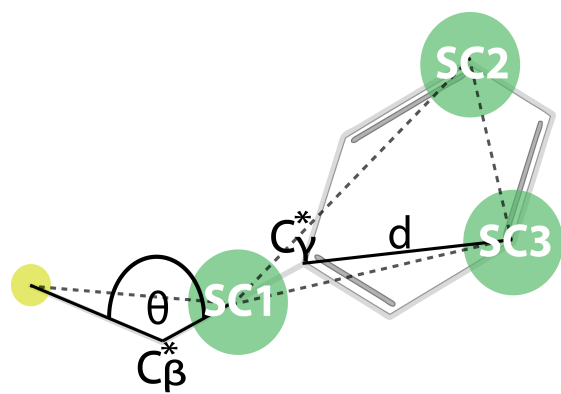

Figure S2: Reconstruction of virtual atoms  $c_{\beta}^*$  and  $c_{\gamma}^*$  for phenylalanine.

### Hydrogen bond reconstruction and its derivatives:

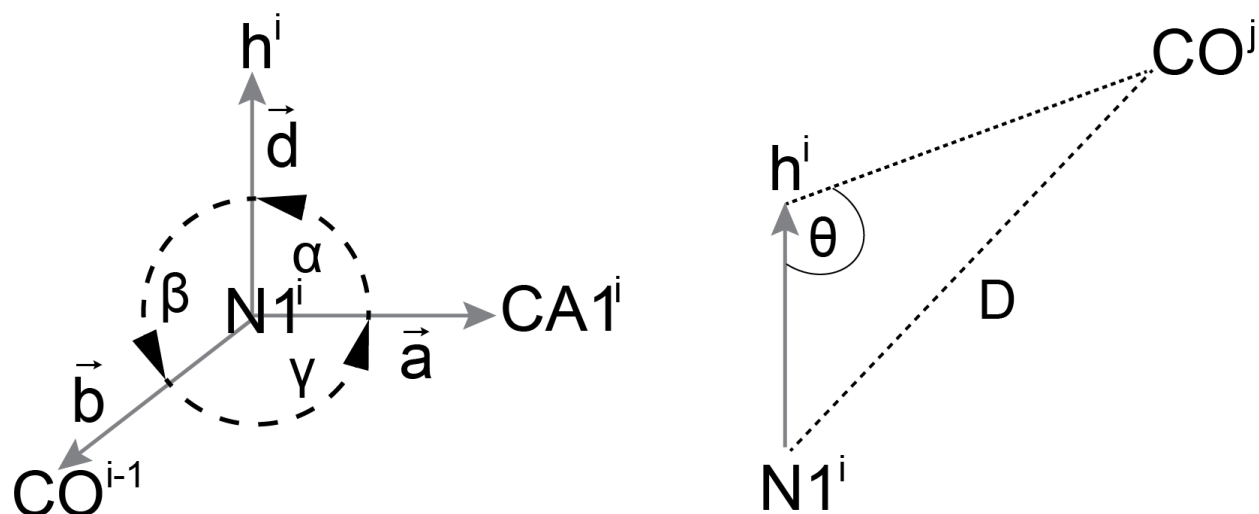

**Figure S3.** Construction of the amino hydrogen atom using CG particles for the  $i^{\text{th}}$  residue. Also shown is the calculation of the hydrogen bonding potential for residues  $i$  and  $j$  using the  $\text{N1}^i\text{-h}^i\text{-CO}^j$  angle ( $\theta$ ) and the distance ( $D$ ) between  $\text{N1}^i$  and  $\text{CO}^j$  particles.

The hydrogen atom on the  $i^{\text{th}}$  residue is constructed (See Fig. S1) using three CG particles,  $\text{N1}$  and  $\text{CA1}$  of the  $i^{\text{th}}$  residue as well as  $\text{CO}$  of the  $(i-1)^{\text{th}}$  residue.

First, we define  $\vec{a}(x_a, y_a, z_a)$  and  $\vec{b}(x_b, y_b, z_b)$  as

$$\begin{aligned} q_a &= q_{\text{CA1}}^i - q_{\text{N1}}^i \quad \text{for } q = x, y, z \\ q_b &= q_{\text{CO}}^{i-1} - q_{\text{N1}}^i \quad \text{for } q = x, y, z \end{aligned} \quad (1)$$

Since the vectors  $\vec{a}$ ,  $\vec{b}$  and the hydrogen atom bonded to the nitrogen are in the same plane, it can be shown from elementary trigonometric (or alternatively using vector cross-product definition) that the position of hydrogen atom  $\vec{h}(x_h, y_h, z_h)$  is given by the relation



$$\begin{aligned}
\vec{d} &= F_A \vec{a} + F_B \vec{b} \\
F_A &= -\frac{d}{\sin\gamma} \left( \frac{\sin\beta}{a} \right) \\
F_B &= -\frac{d}{\sin\gamma} \left( \frac{\sin\alpha}{b} \right) \\
q_h^i &= q_{N1}^i + q_d \text{ for } q = x, y, z
\end{aligned} \tag{2}$$

where the angles  $\alpha$ ,  $\beta$  and  $\gamma$ , as well as the magnitudes of vectors  $a$  and  $b$  are based on atomistic simulations. These parameters together define the constant parameters  $F_A$  and  $F_B$  used in the reconstruction.

The hydrogen bond potential ( $s_{2d}(\cos\theta, D)$ ) is a 2D spline-interpolated potential, a knowledge-based potential based on statistical analysis of 2000+ high resolution crystal structures. The potential is a function of the distance between the donor ( $N1$  particle of  $i^{\text{th}}$  residue) and the acceptor ( $CO$  of  $j^{\text{th}}$  residue), and the angle formed between them with the reconstructed hydrogen atom.

The derivatives of this potential are applied to CG particles used in the construction of hydrogen atom and the acceptor  $CO$  particle. The derivatives in Cartesian co-ordinate system are given as

$$\begin{aligned}
\frac{\partial s_{2d}(\cos\theta, D)}{\partial q_k} &= \frac{\partial s_{2d}(\cos\theta, D)}{\partial \cos\theta} \cdot \frac{\partial \cos\theta}{\partial q_k} \\
\frac{\partial s_{2d}(\cos\theta, D)}{\partial q_k} &= \frac{\partial s_{2d}(\cos\theta, D)}{\partial D} \cdot \frac{\partial D}{\partial q_k}
\end{aligned} \tag{3}$$

for  $q = x, y, z$  and  $k = CO^{i-1}, N1^i, CA1^i$  and  $CO^j$

where  $\frac{\partial s_{2d}(\cos\theta, D)}{\partial \cos\theta}$  and  $\frac{\partial s_{2d}(\cos\theta, D)}{\partial D}$  are numerically determined during the spline interpolation.

The procedure for determining the derivatives of the distance ( $D$ ) and the angle ( $\cos\theta$ ) is as follows:

First, the distance  $D$  and the angle ( $\cos\theta$ ) are given by the relation

$$\begin{aligned}
D &= \sqrt{\sum_{q=x,y,z} (q_{CO}^j - q_{NI}^i)^2} \\
\cos\theta &= - \frac{\sum_{q=x,y,z} (q_h^i - q_{CO}^j)(q_h^i - q_{NI}^i)}{\sqrt{\sum_{q=x,y,z} (q_h^i - q_{CO}^j)^2} d_{NIh}}
\end{aligned} \tag{4}$$

where  $d_{NIh}$  is the constant bond length used in the hydrogen bond reconstruction, set to the standard N-H bond length of the CHARMM force field.

The derivatives for the distance (D) are given by

$$\frac{\partial D}{\partial q_k} = \begin{cases} \frac{q_{CO}^j - q_{NI}^i}{D} & \text{for } q = x, y, z \text{ and } k = CO^j \\ -\frac{q_{CO}^j - q_{NI}^i}{D} & \text{for } q = x, y, z \text{ and } k = NI^i \end{cases} \tag{5}$$

The derivatives for the angle are

$$\begin{aligned}
\frac{\partial \cos\theta}{\partial q_{CA1}^i} &= - \frac{F_A ((q_h^i - q_{CO}^j) + (q_h^i - q_{NI}^i))}{\sqrt{\sum_{q=x,y,z} (q_h^i - q_{CO}^j)^2} d_{NIh}} + \\
&\frac{F_A (q_h^i - q_{CO}^j) \sum_{q=x,y,z} (q_h^i - q_{CO}^j)(q_h^i - q_{NI}^i)}{\left( \sqrt{\sum_{q=x,y,z} (q_h^i - q_{CO}^j)^2} \right)^3 d_{NIh}} \text{ for } q = x, y, z
\end{aligned} \tag{6}$$

$$\begin{aligned}
\frac{\partial \cos \theta}{\partial q_{CO}^{i-1}} = & - \frac{F_B ((q_h^i - q_{CO}^j) + (q_h^i - q_{NI}^j))}{\sqrt{\sum_{q=x,y,z} (q_h^i - q_{CO}^j)^2} d_{NIh}} + \\
& \frac{F_B (q_h^i - q_{CO}^j) \sum_{q=x,y,z} (q_h^i - q_{CO}^j)(q_h^i - q_{NI}^j)}{\left( \sqrt{\sum_{q=x,y,z} (q_h^i - q_{CO}^j)^2} \right)^3 d_{NIh}} \quad \text{for } q = x, y, z
\end{aligned} \tag{7}$$

$$\begin{aligned}
\frac{\partial \cos \theta}{\partial q_{NI}^i} = & \frac{(1 - F_A - F_B) (q_h^i - q_{NI}^i) - (F_A + F_B)(q_h^i - q_{CO}^j)}{\sqrt{\sum_{q=x,y,z} (q_h^i - q_{CO}^j)^2} d_{NIh}} + \\
& \frac{(1 - F_A - F_B)(q_h^i - q_{CO}^j) \sum_{q=x,y,z} (q_h^i - q_{CO}^j)(q_h^i - q_{NI}^i)}{\left( \sqrt{\sum_{q=x,y,z} (q_h^i - q_{CO}^j)^2} \right)^3 d_{NIh}} \\
& \text{for } q = x, y, z
\end{aligned} \tag{8}$$

$$\begin{aligned}
\frac{\partial \cos \theta}{\partial q_{CO}^j} = & \frac{q_h^i - q_{NI}^i}{\sqrt{\sum_{q=x,y,z} (q_h^i - q_{CO}^j)^2} d_{NIh}} \\
& - \frac{(q_h^i - q_{CO}^j) \sum_{q=x,y,z} (q_h^i - q_{CO}^j)(q_h^i - q_{NI}^i)}{\left( \sqrt{\sum_{q=x,y,z} (q_h^i - q_{CO}^j)^2} \right)^3 d_{NIh}} \quad \text{for } q = x, y, z
\end{aligned} \tag{9}$$

# PRIMO Distance-dependent Spline Interpolated Potentials Fit into CHARMM explicit Dipeptide Simulations

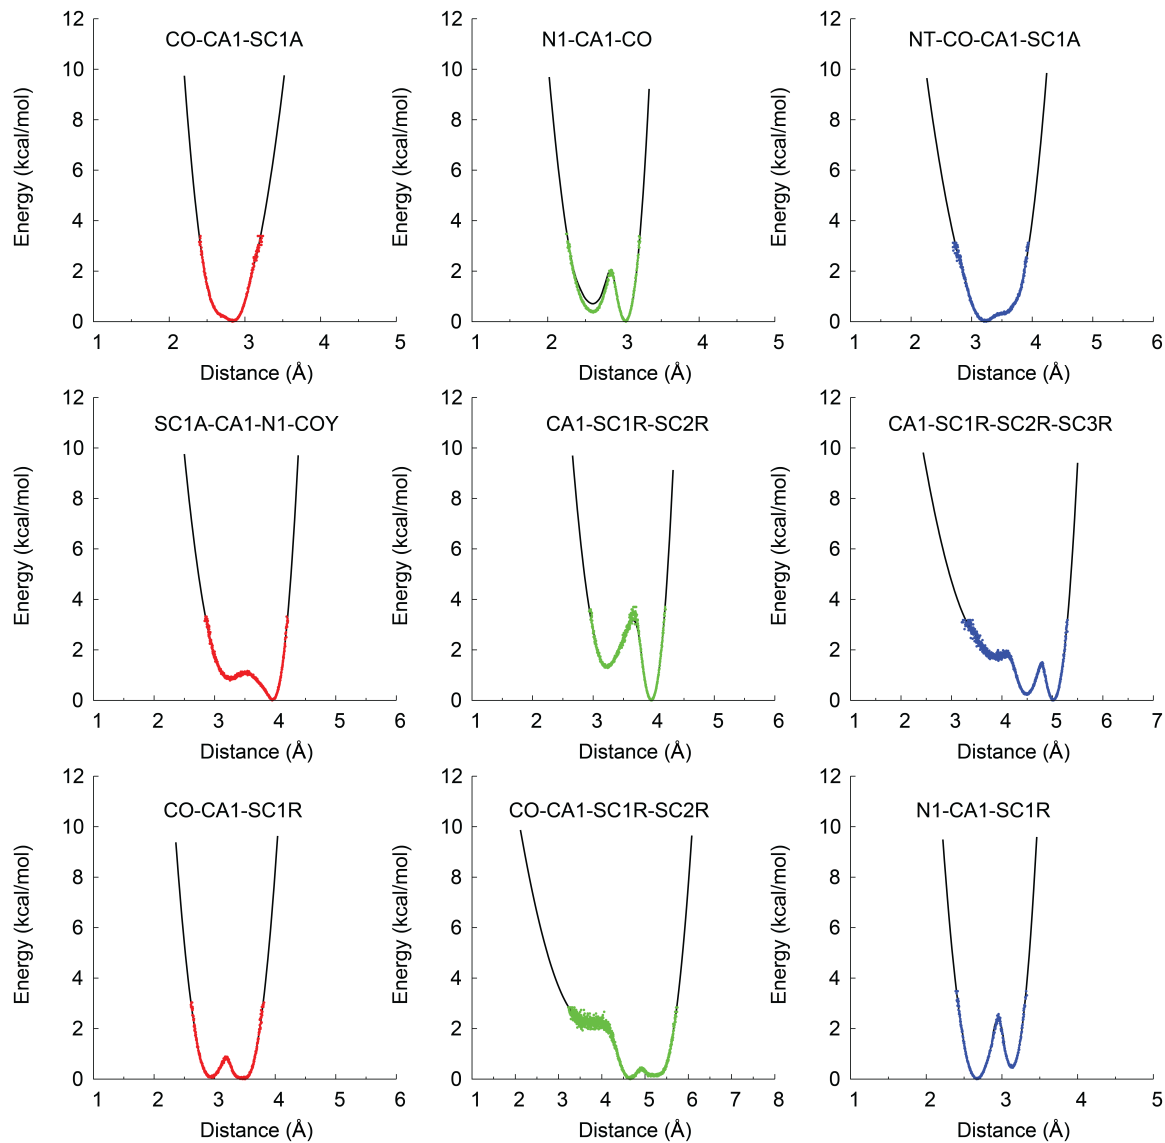

Figure S4: See page S32.

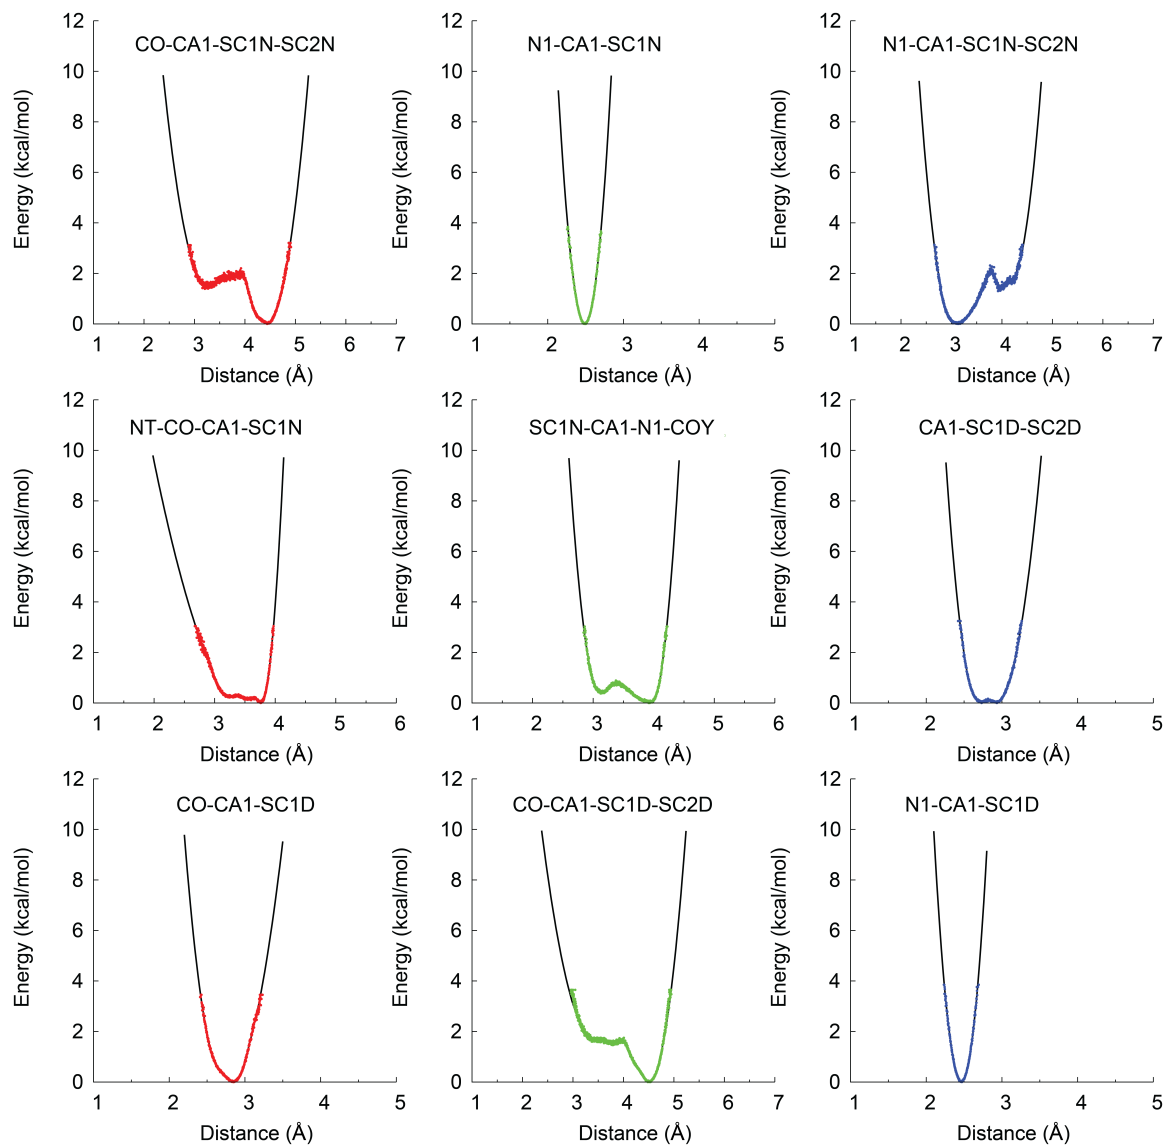

Figure S4: See page S32.

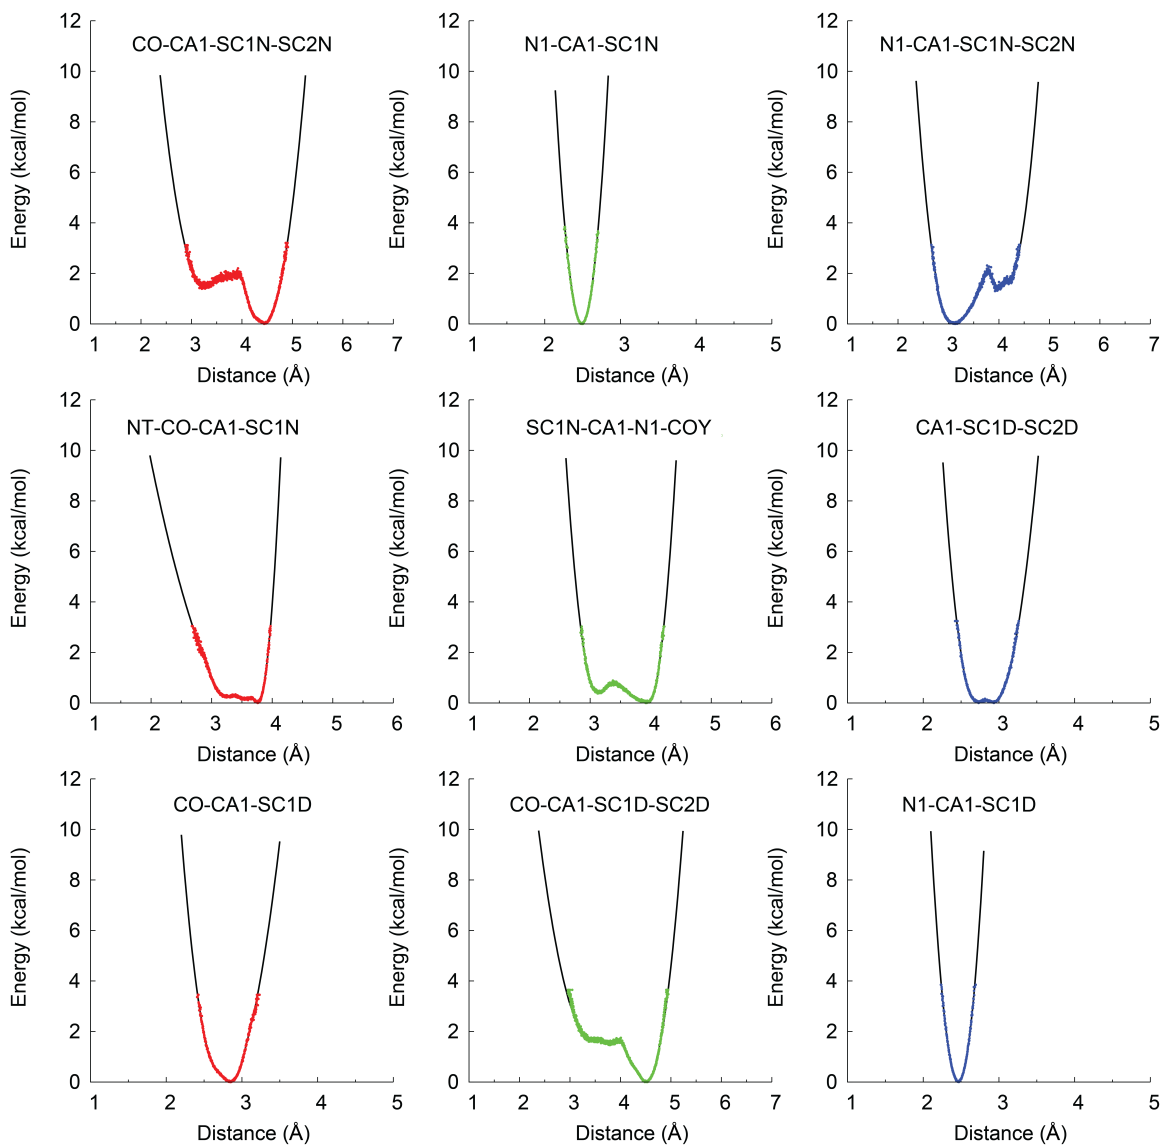

Figure S4: See page S32.

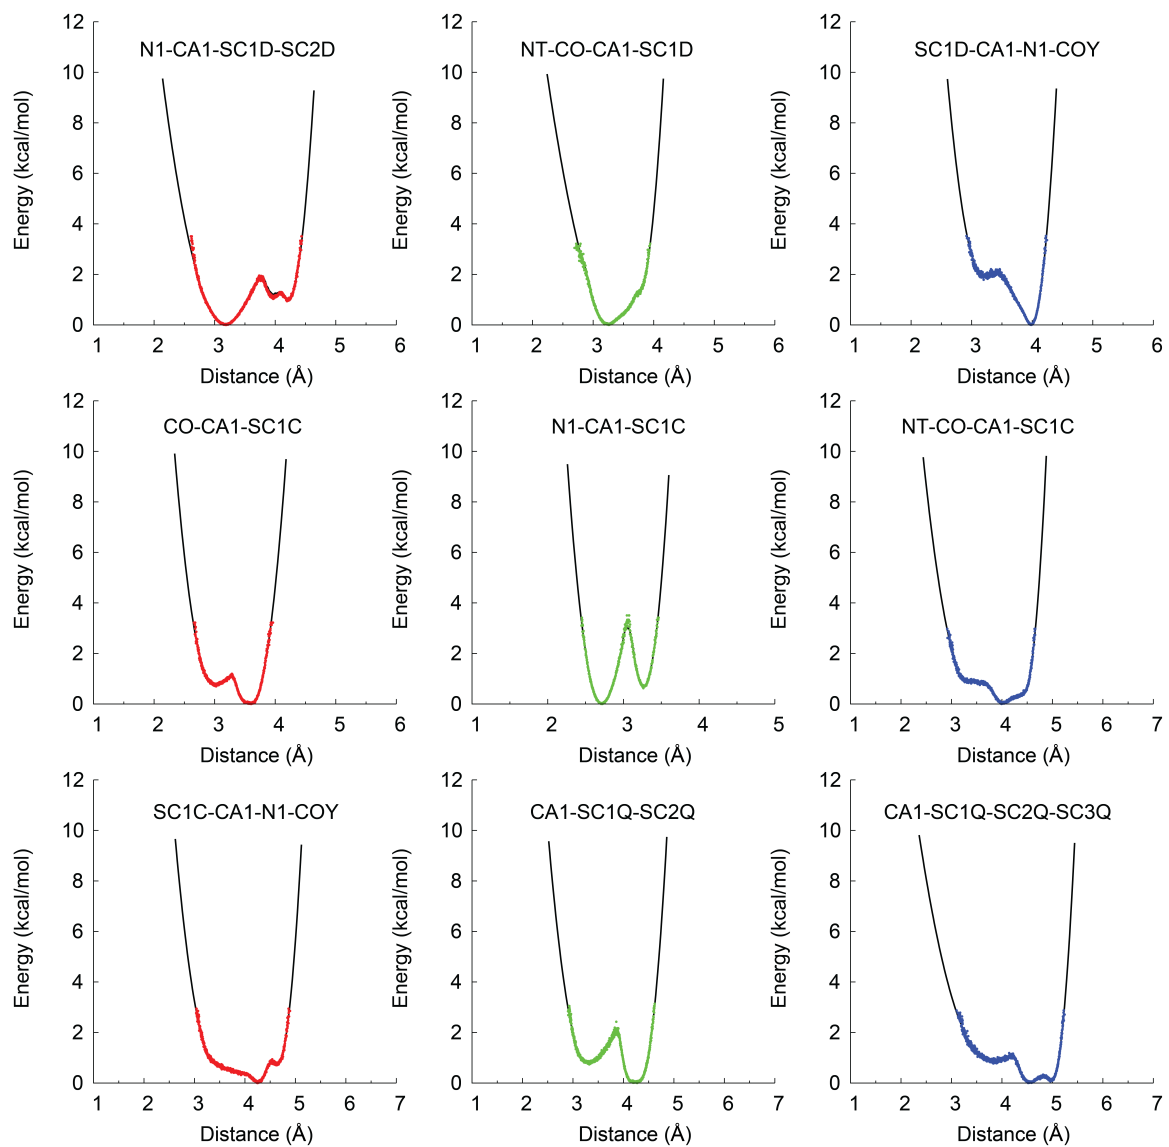

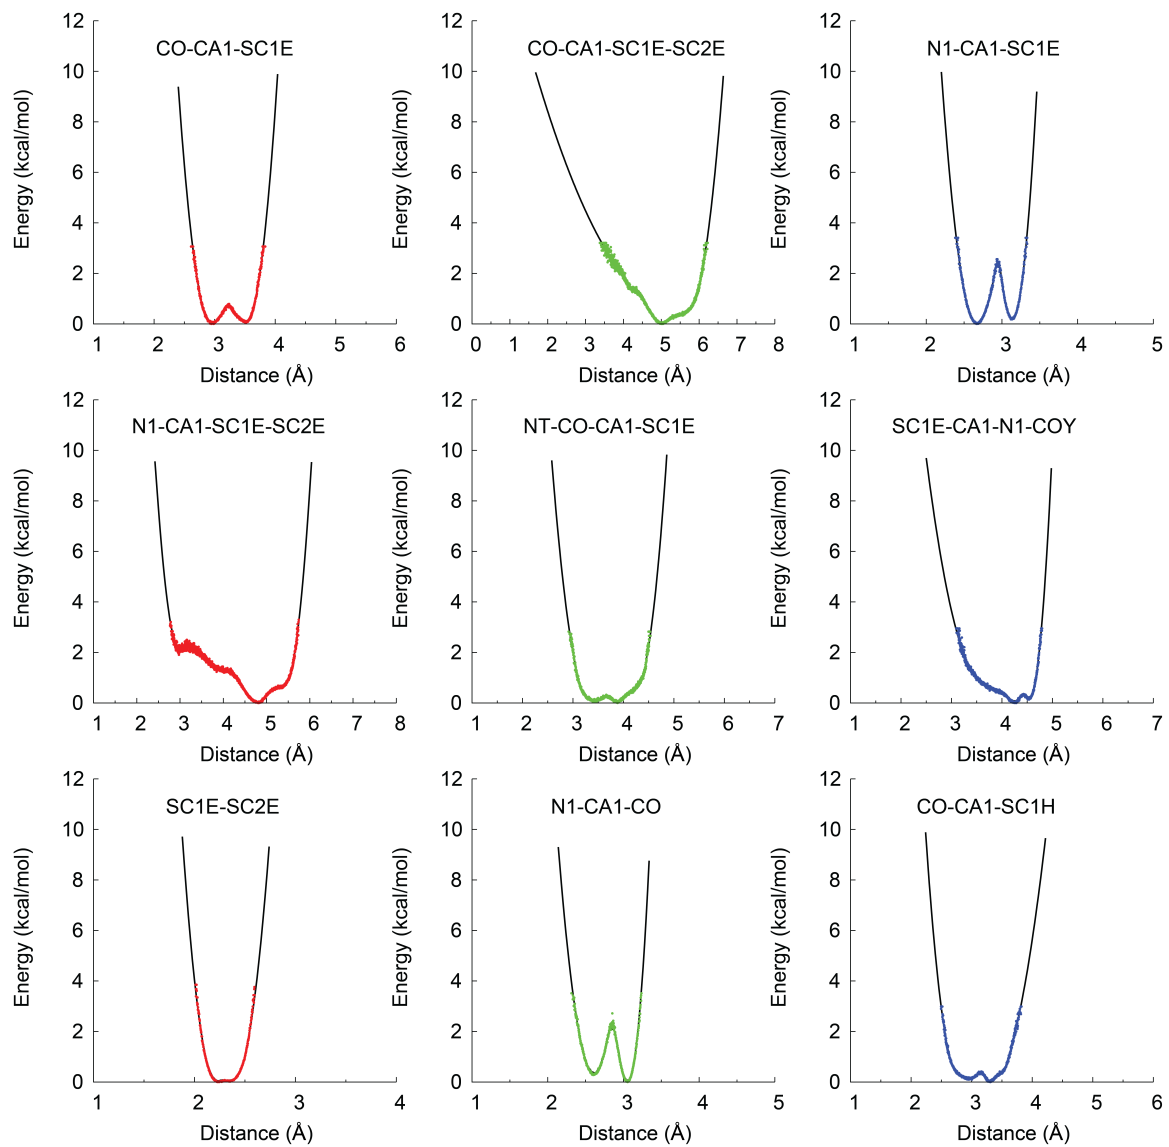

Figure S4: See page S32.





Figure S4: See page S32.

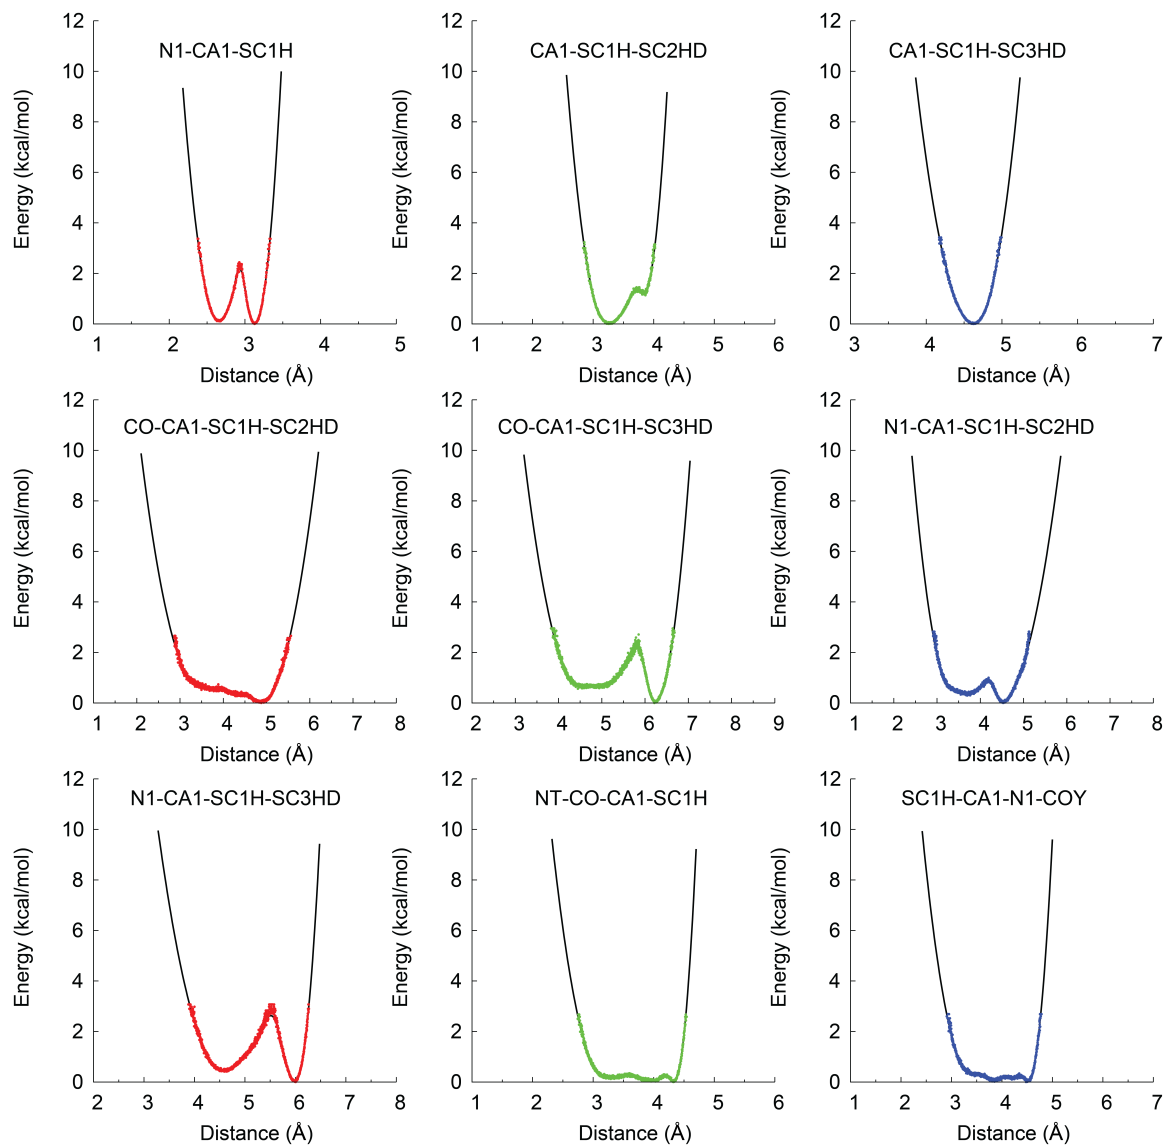

Figure S4: See page S32.

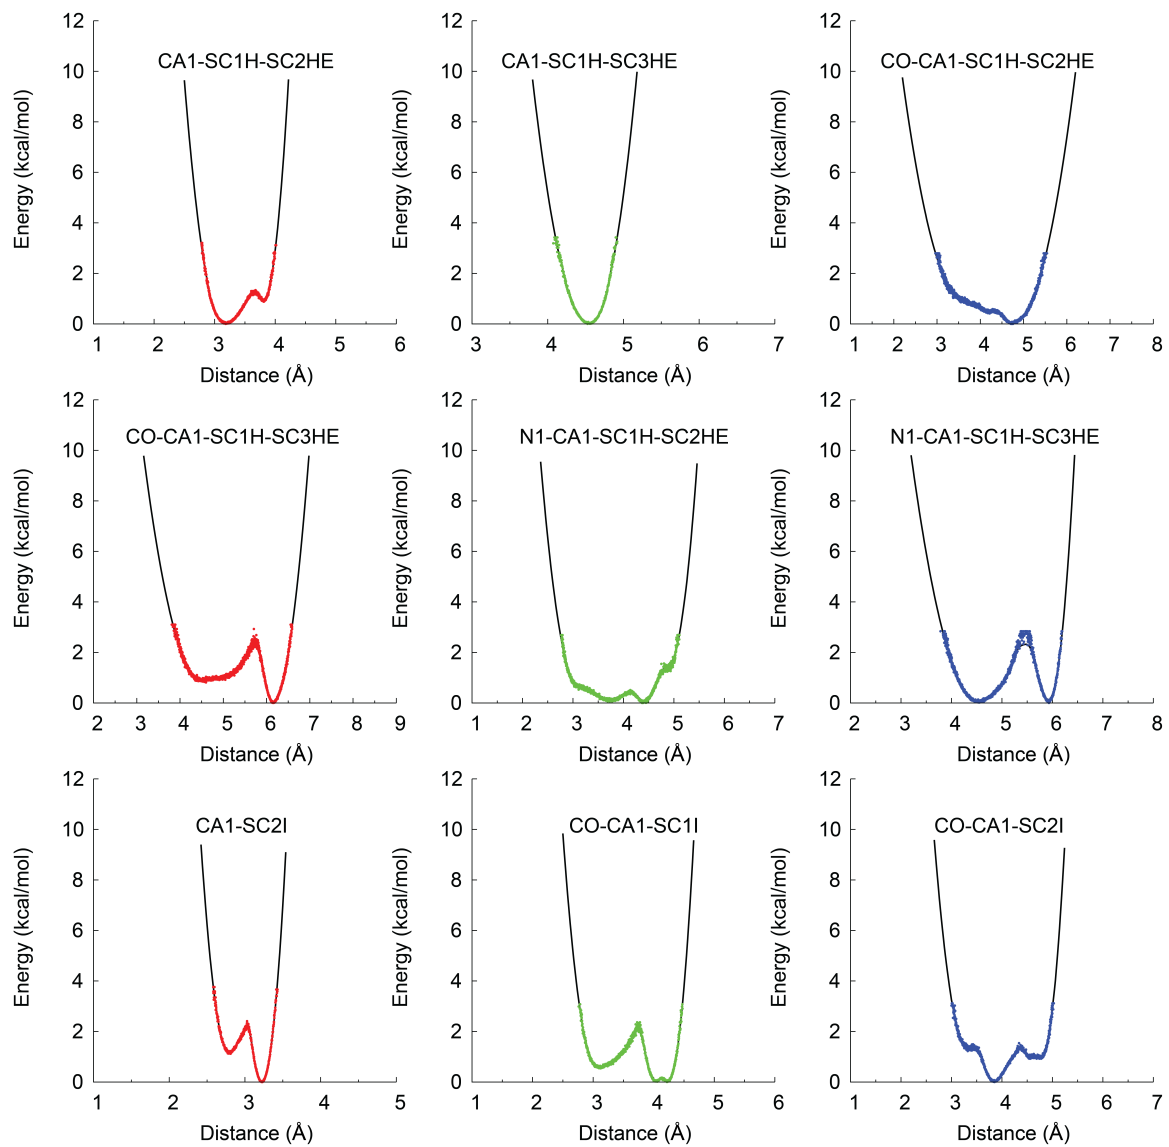

Figure S4: See page S32.

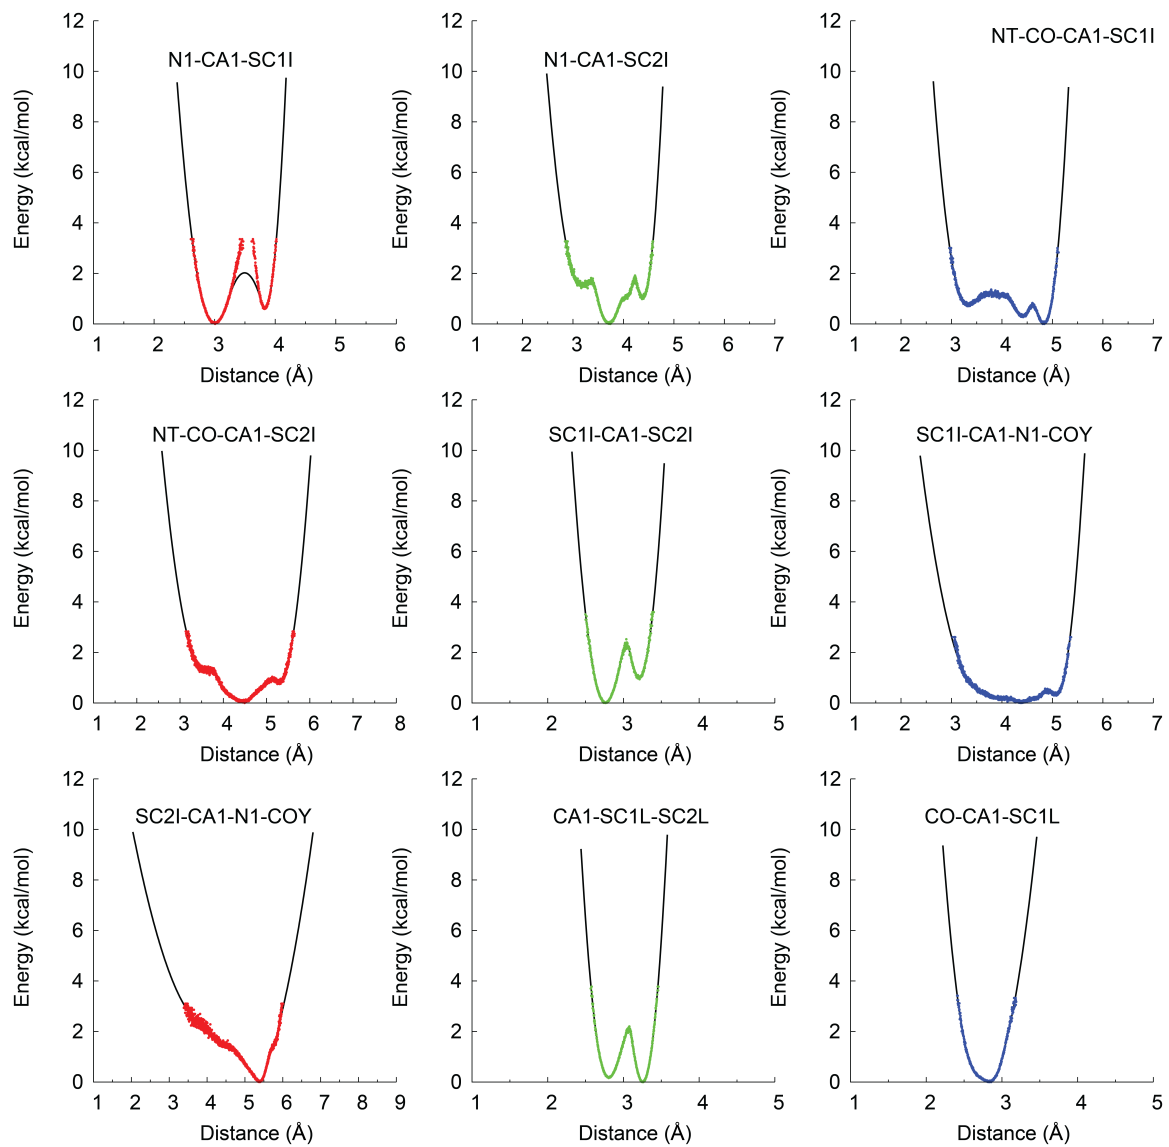

Figure S4: See page S32.

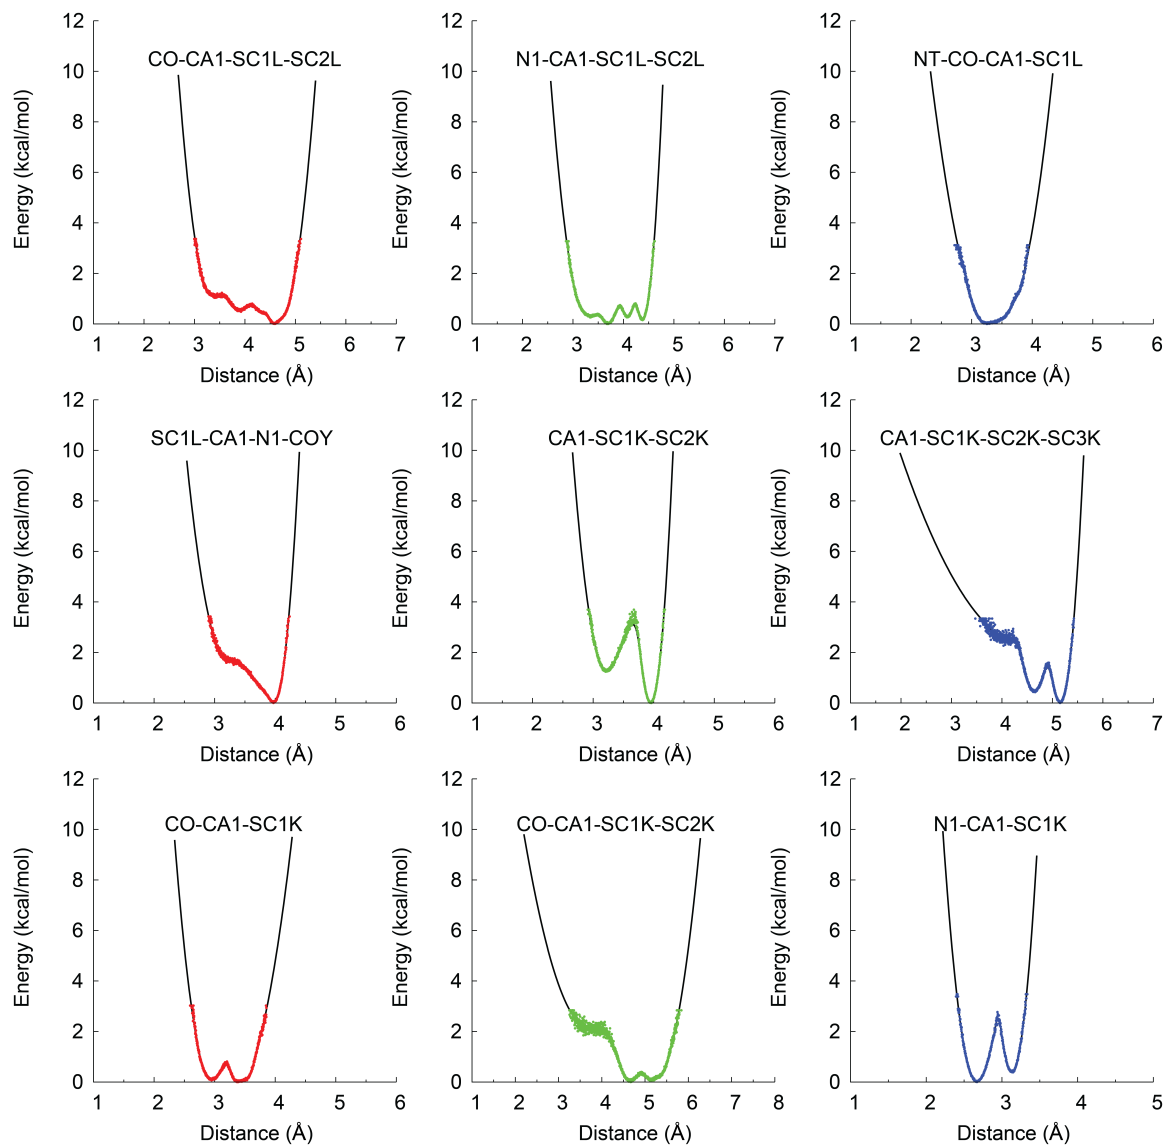

Figure S4: See page S32.

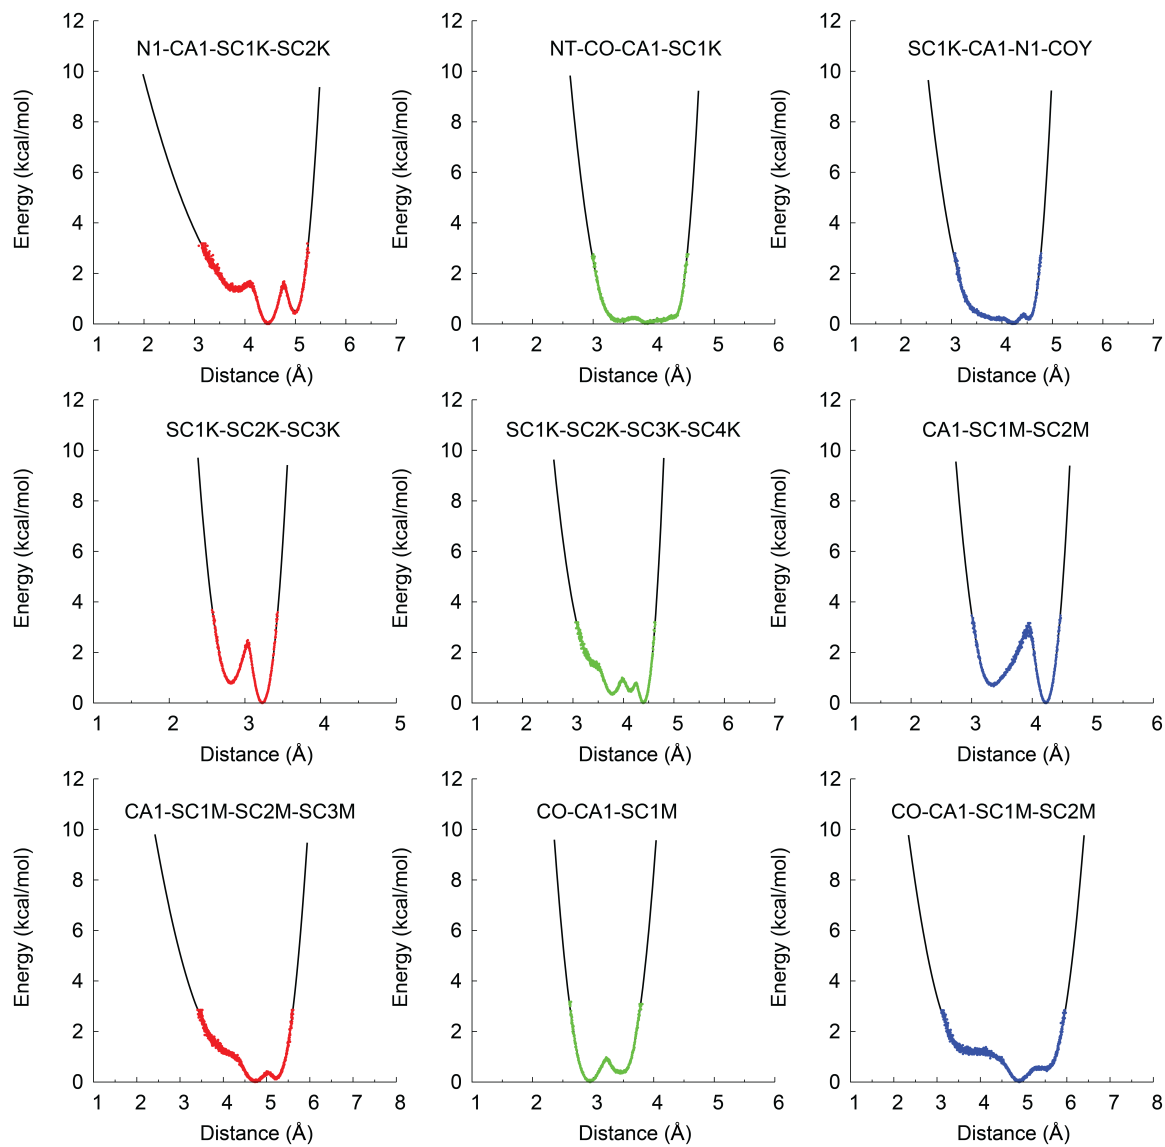

Figure S4: See page S32.

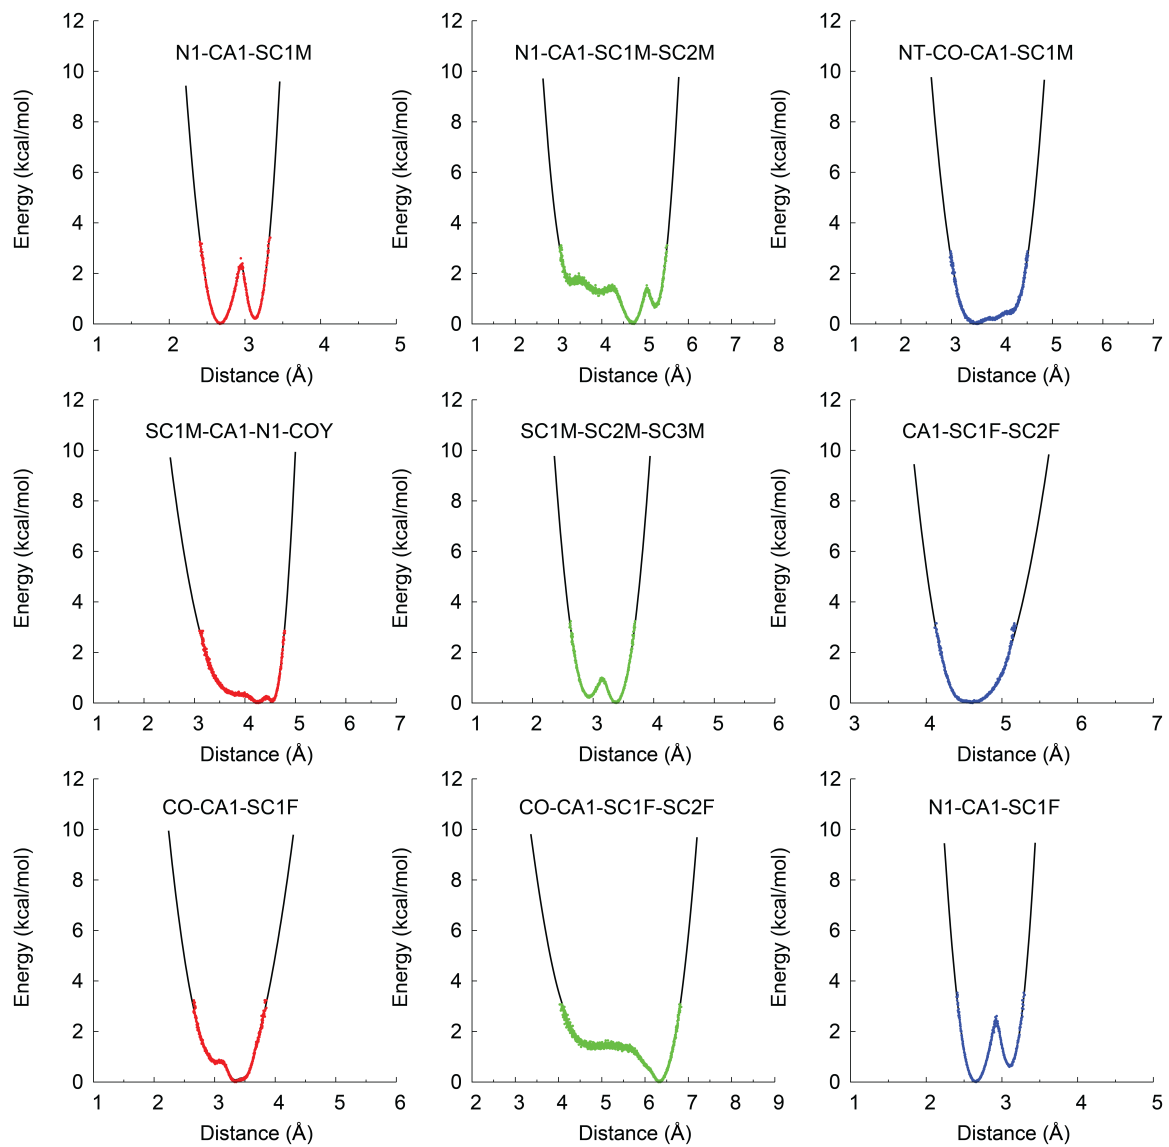

Figure S4: See page S32.

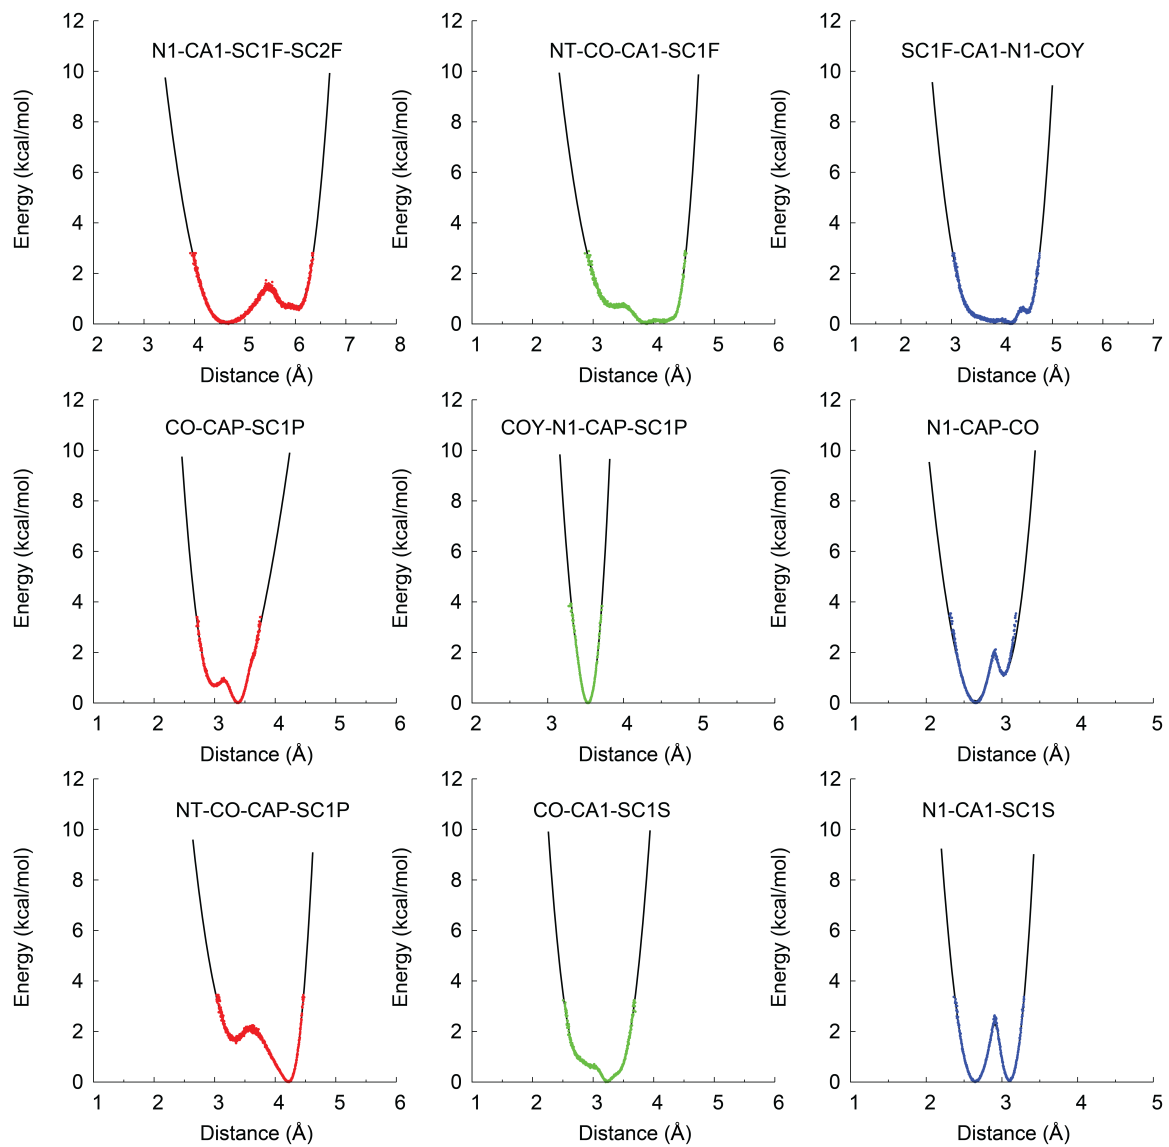

Figure S4: See page S32.



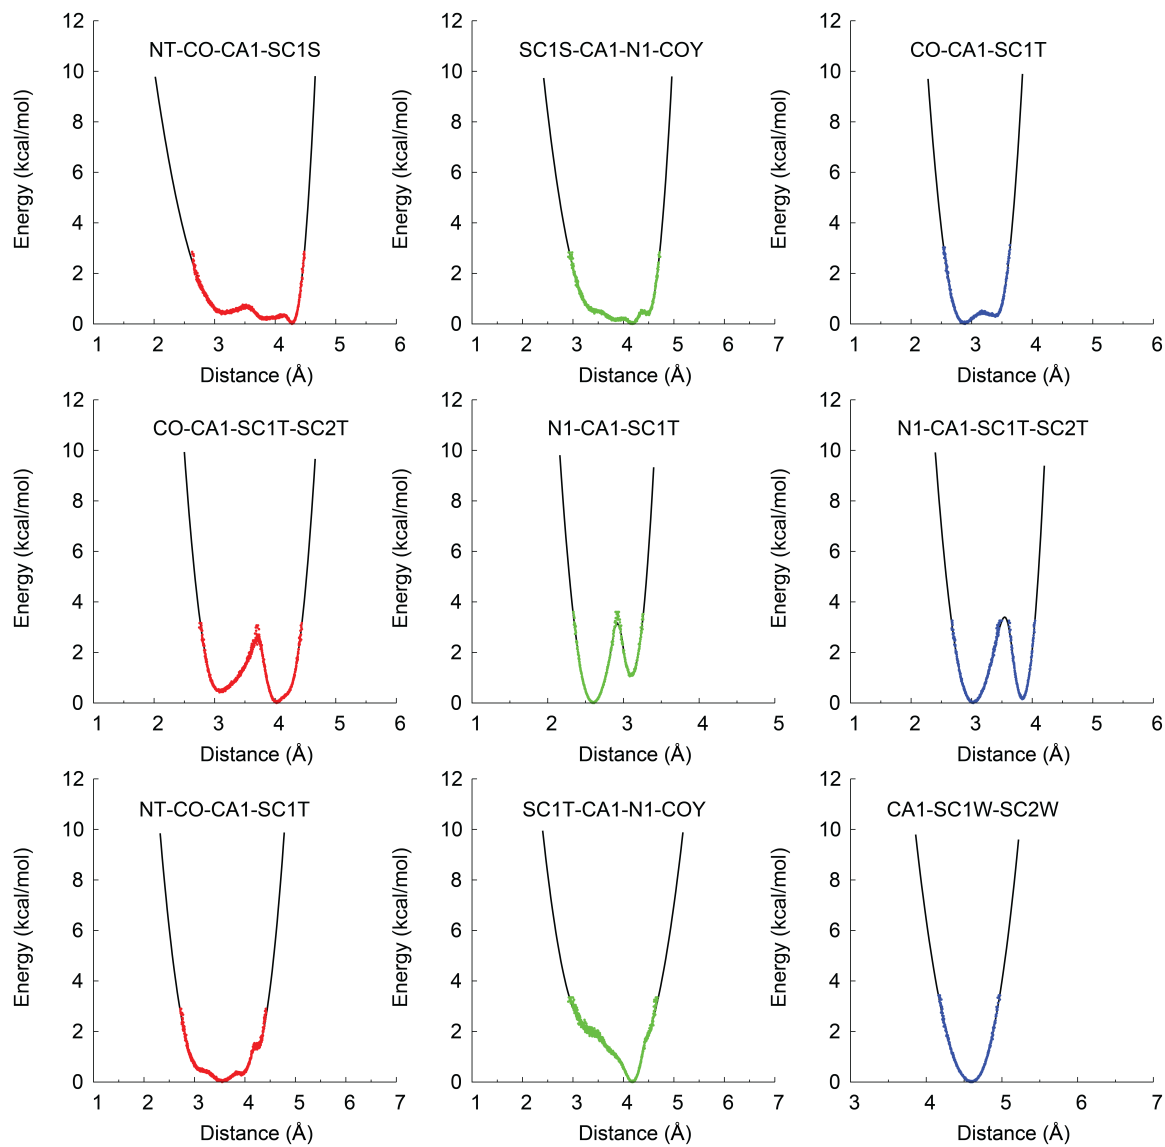

Figure S4: See page S32.

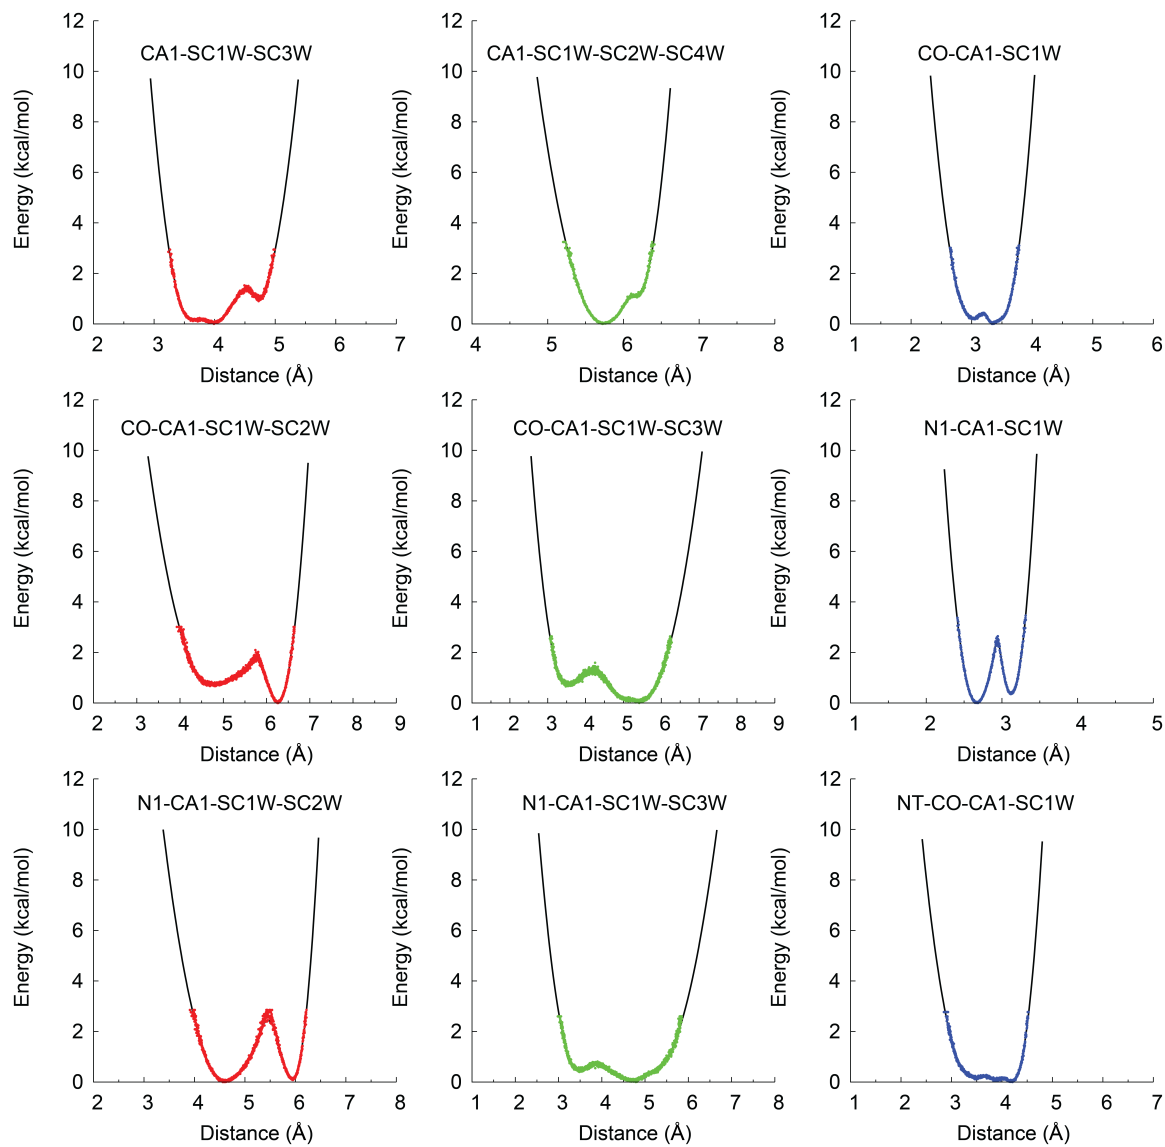

Figure S4: See page S32.

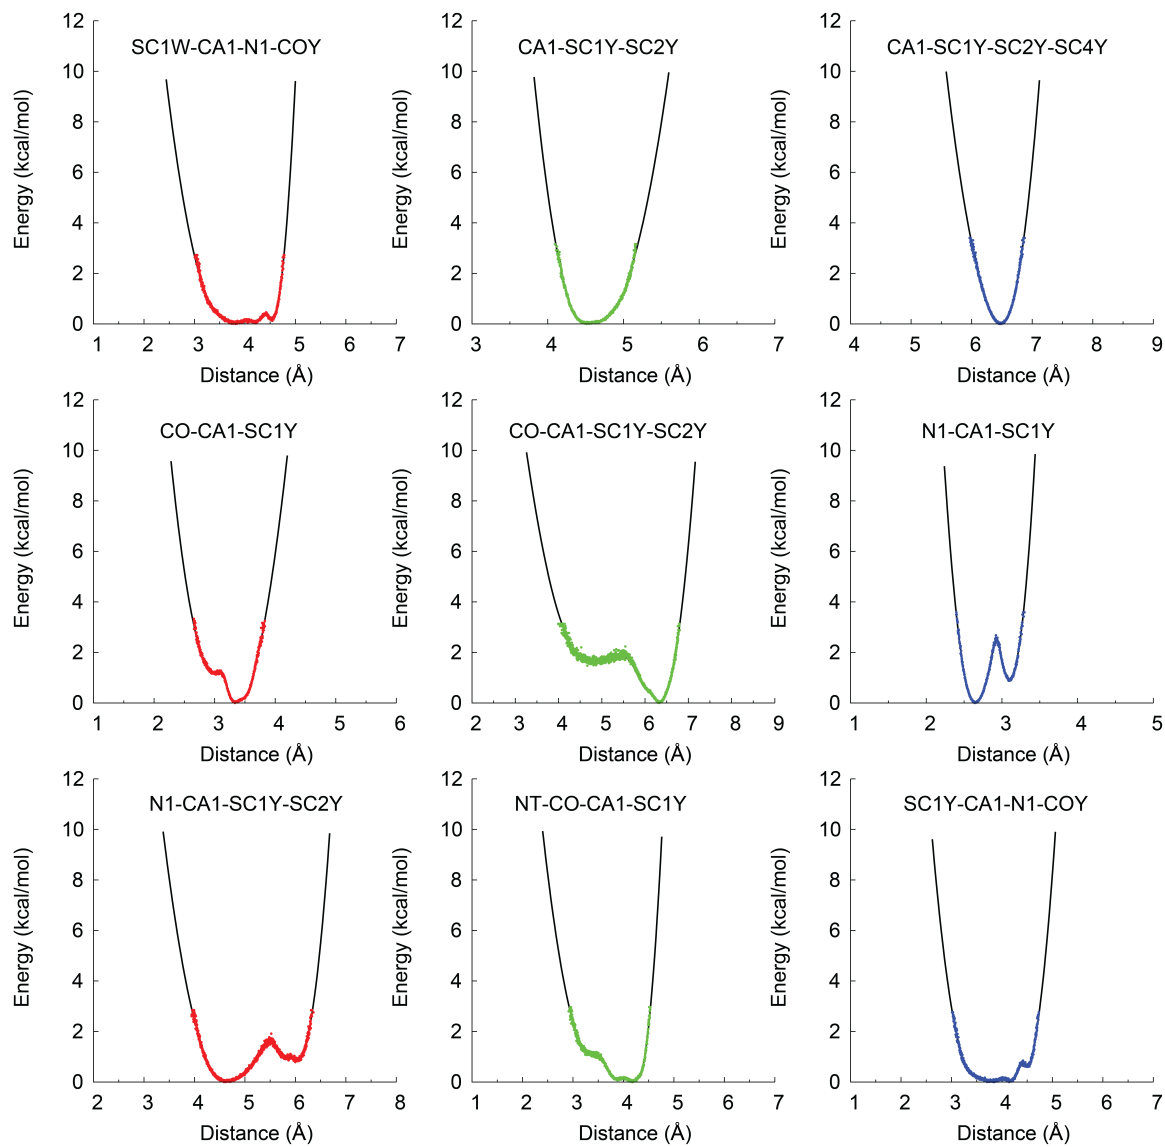

Figure S4: See page S32.

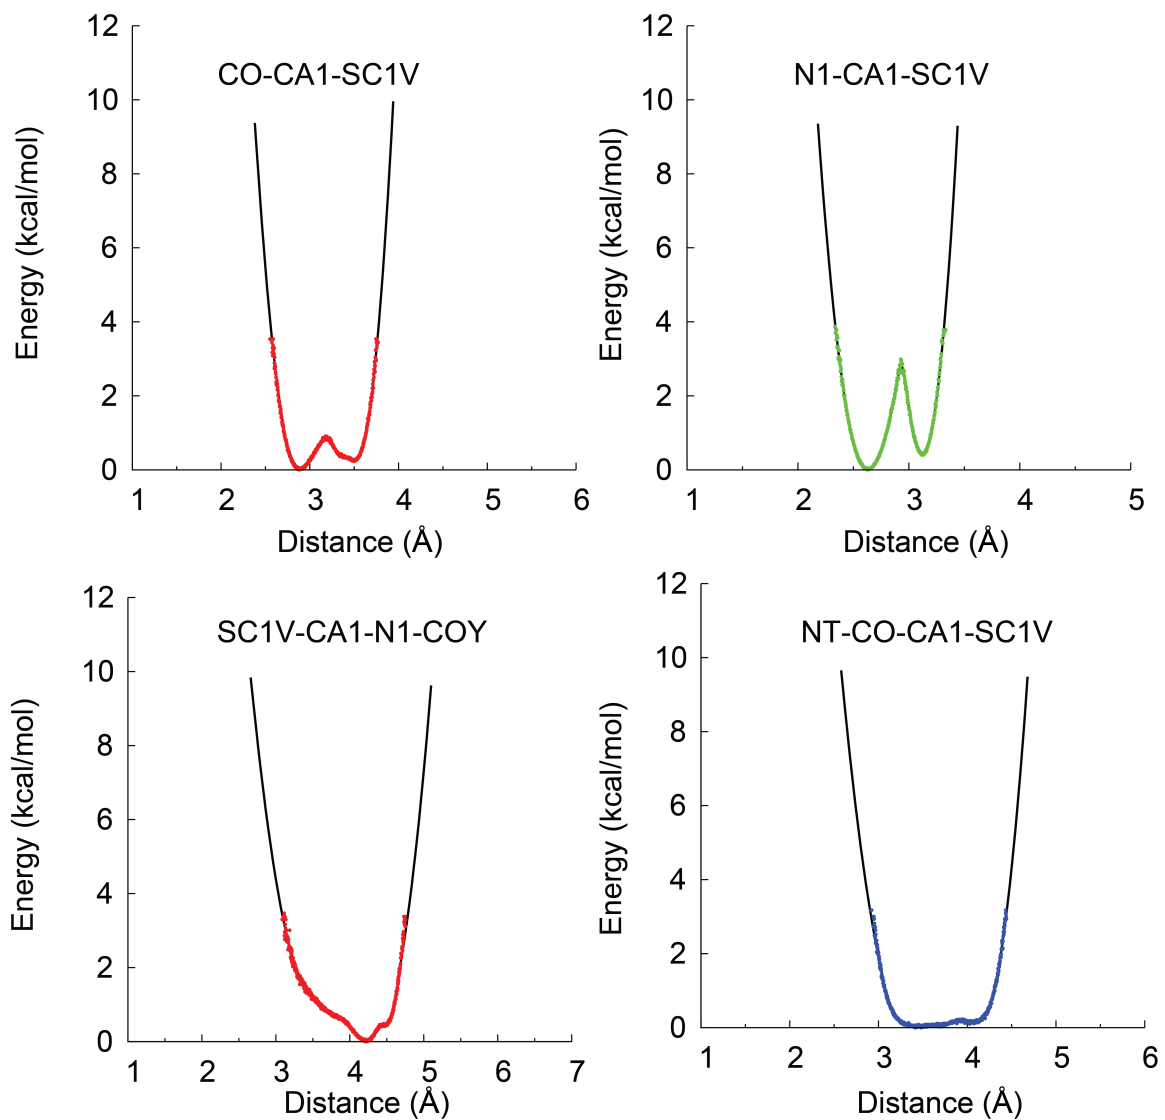

Figure S4: PRIMO distance spline potentials for bond, angle, and torsion terms for all naturally occurring amino acids. The spline (black) is fitted into the sampling (red) from CHARMM dipeptide simulations.

## Comparison of Sampling of Internal Degrees of Freedom in AXA and CHARMM Explicit Dipeptide Simulations

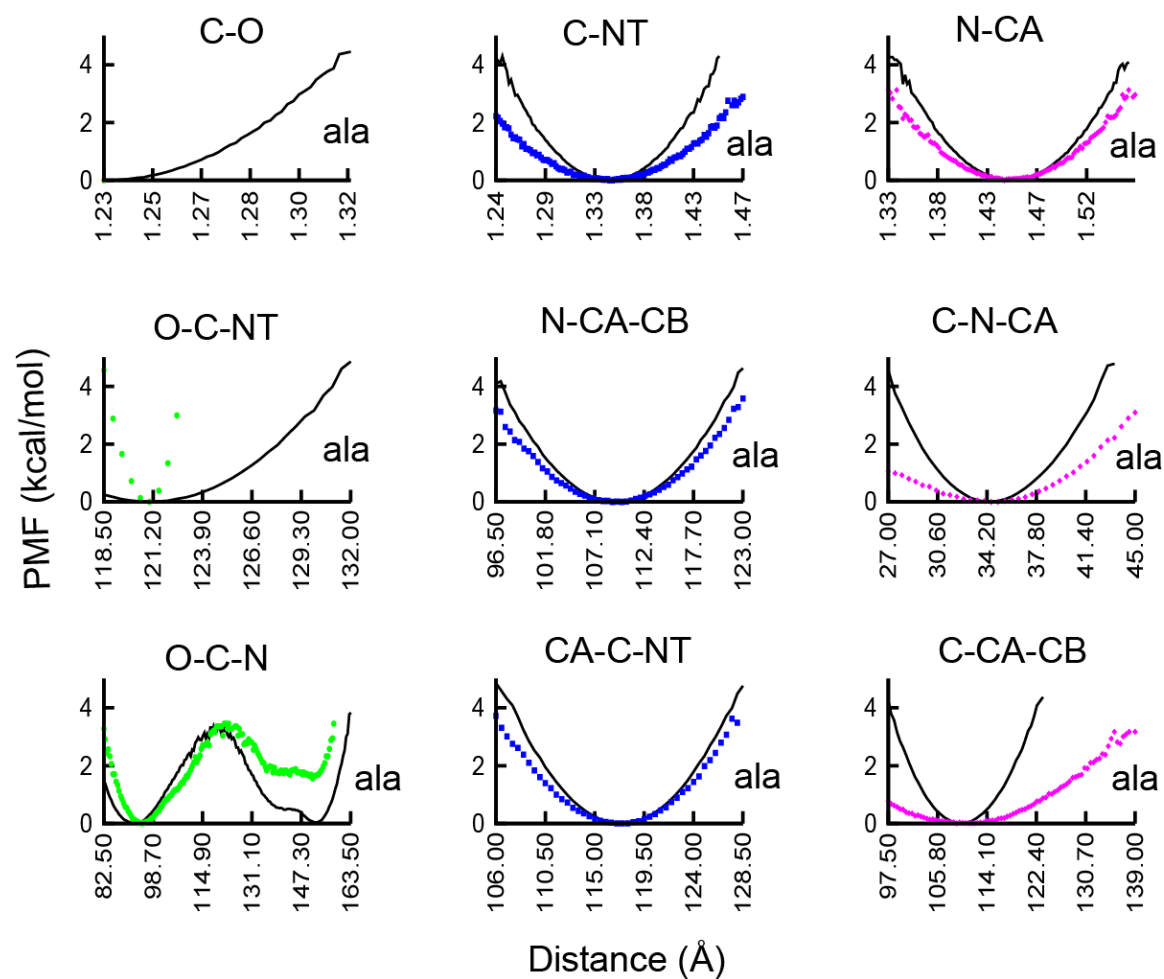

Figure S5: See page S75.

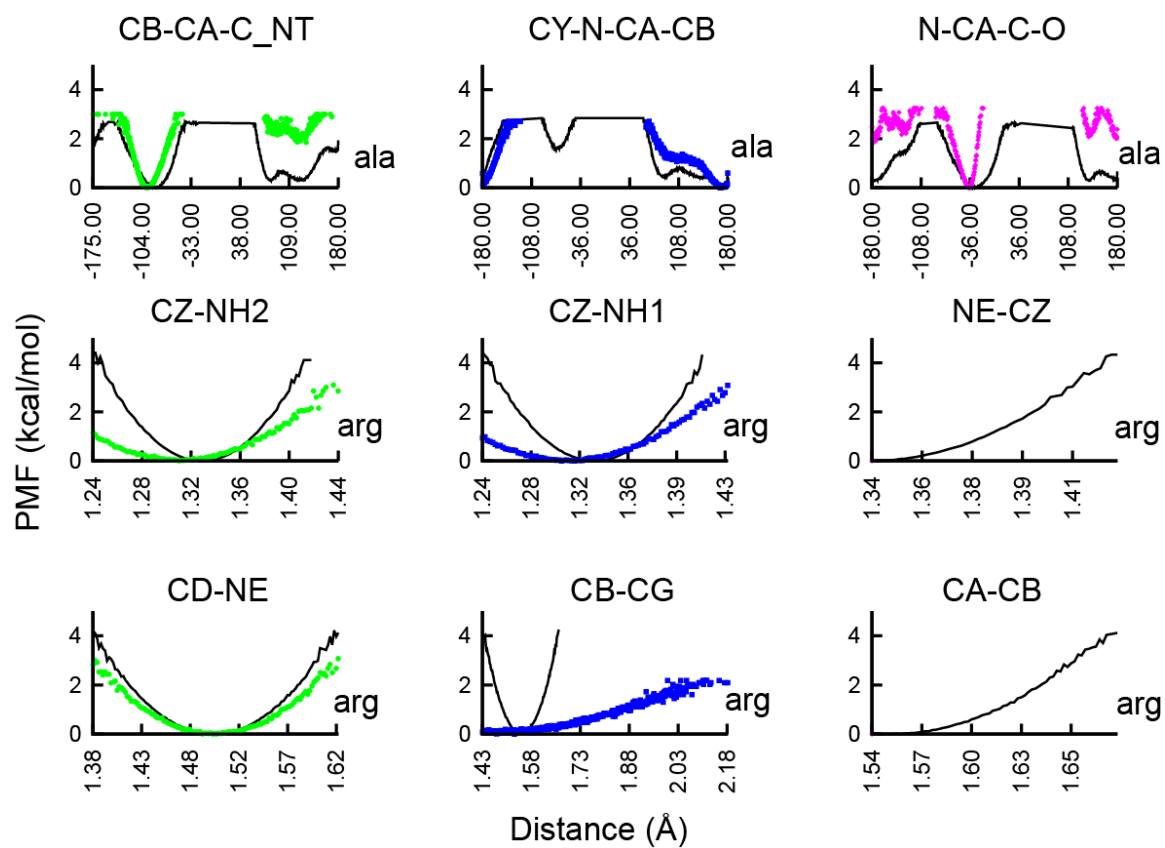

Figure S5: See page S75.

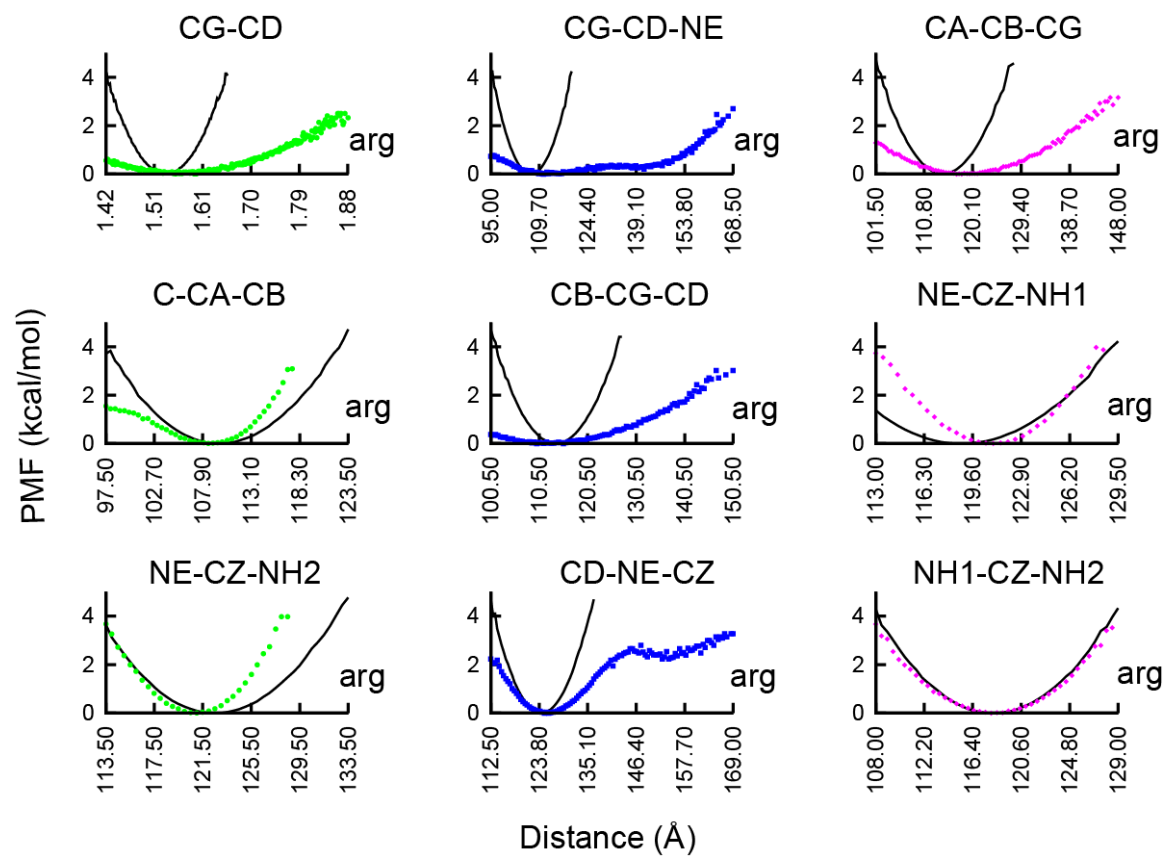

Figure S5: See page S75.

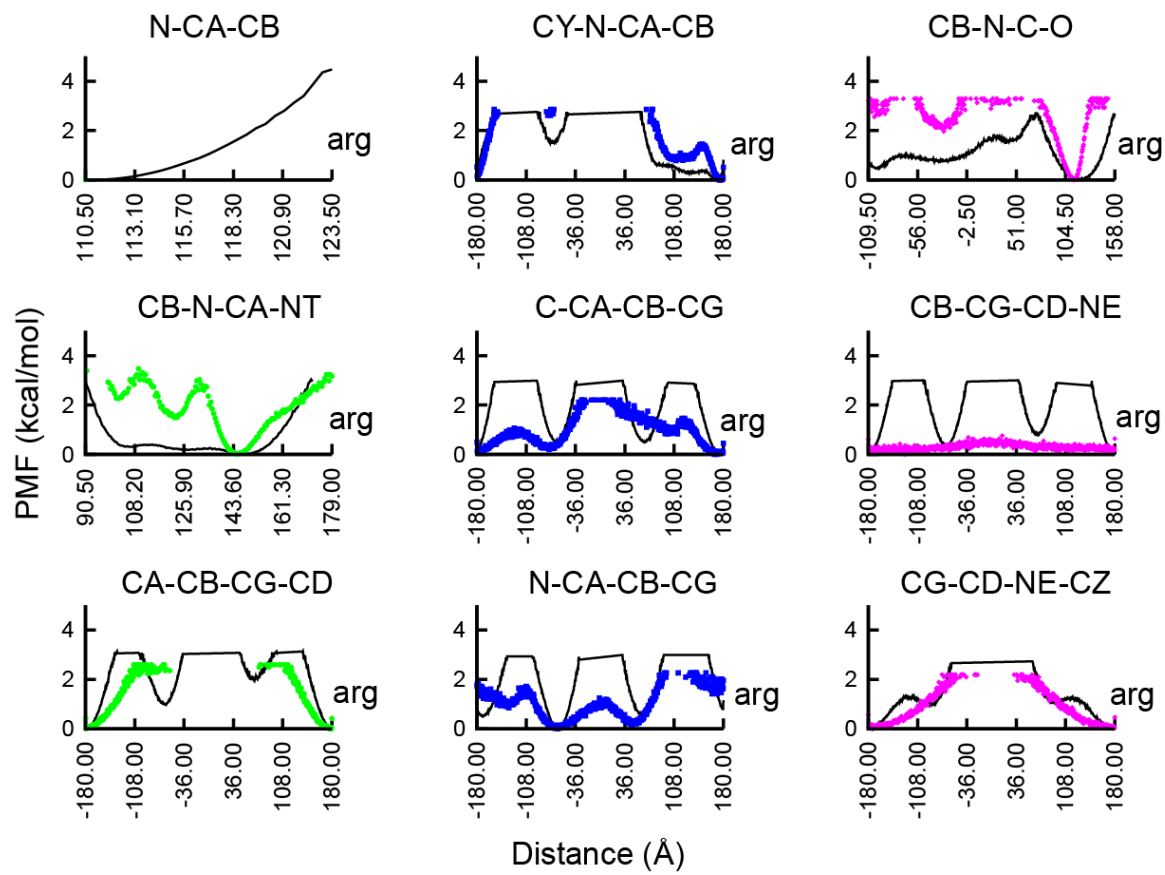

Figure S5: See page S75.



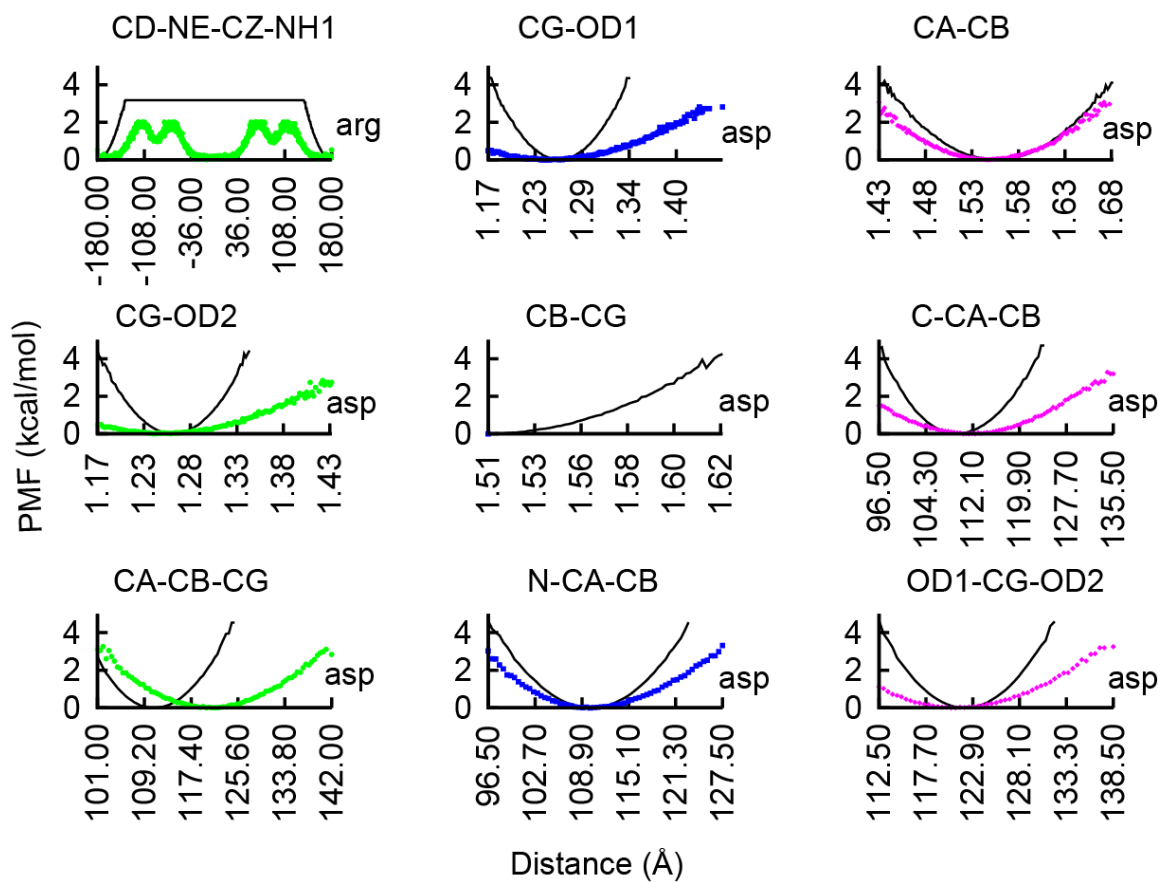

Figure S5: See page S75.

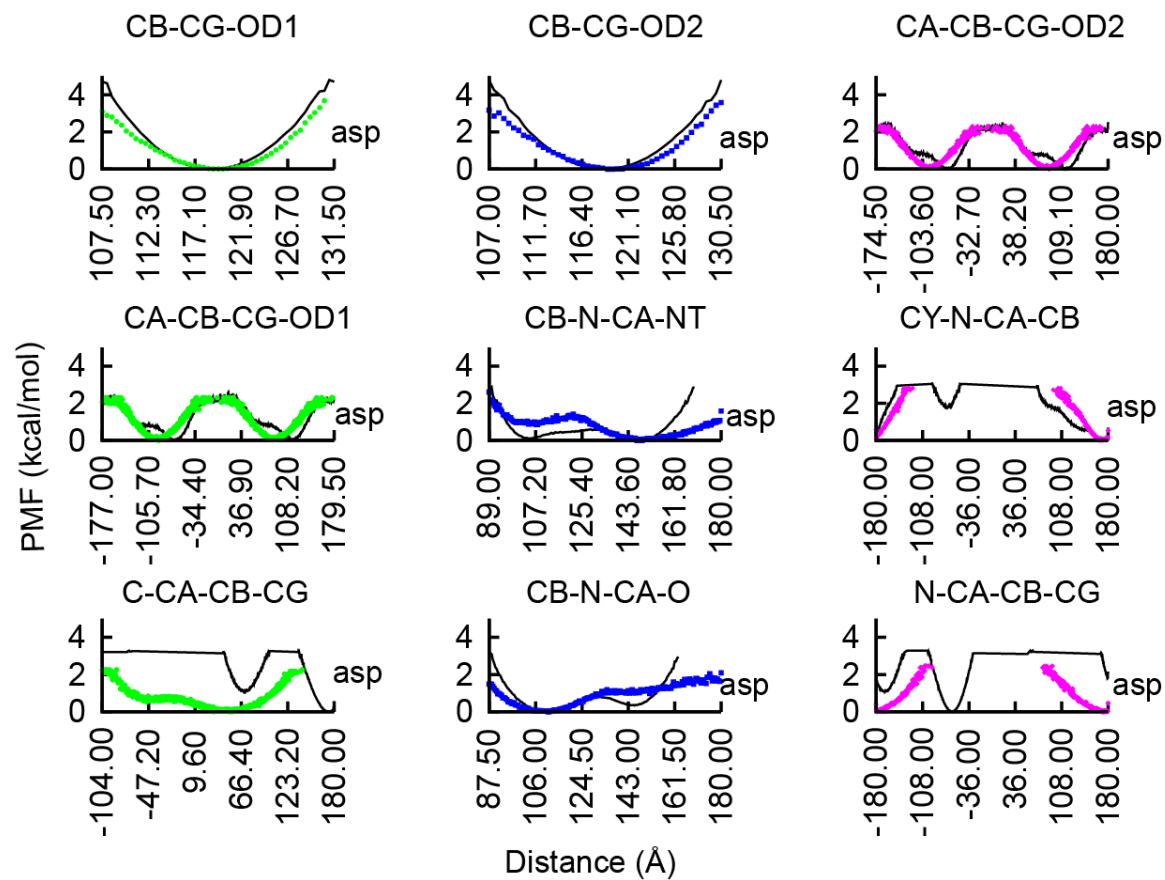

Figure S5: See page S75.

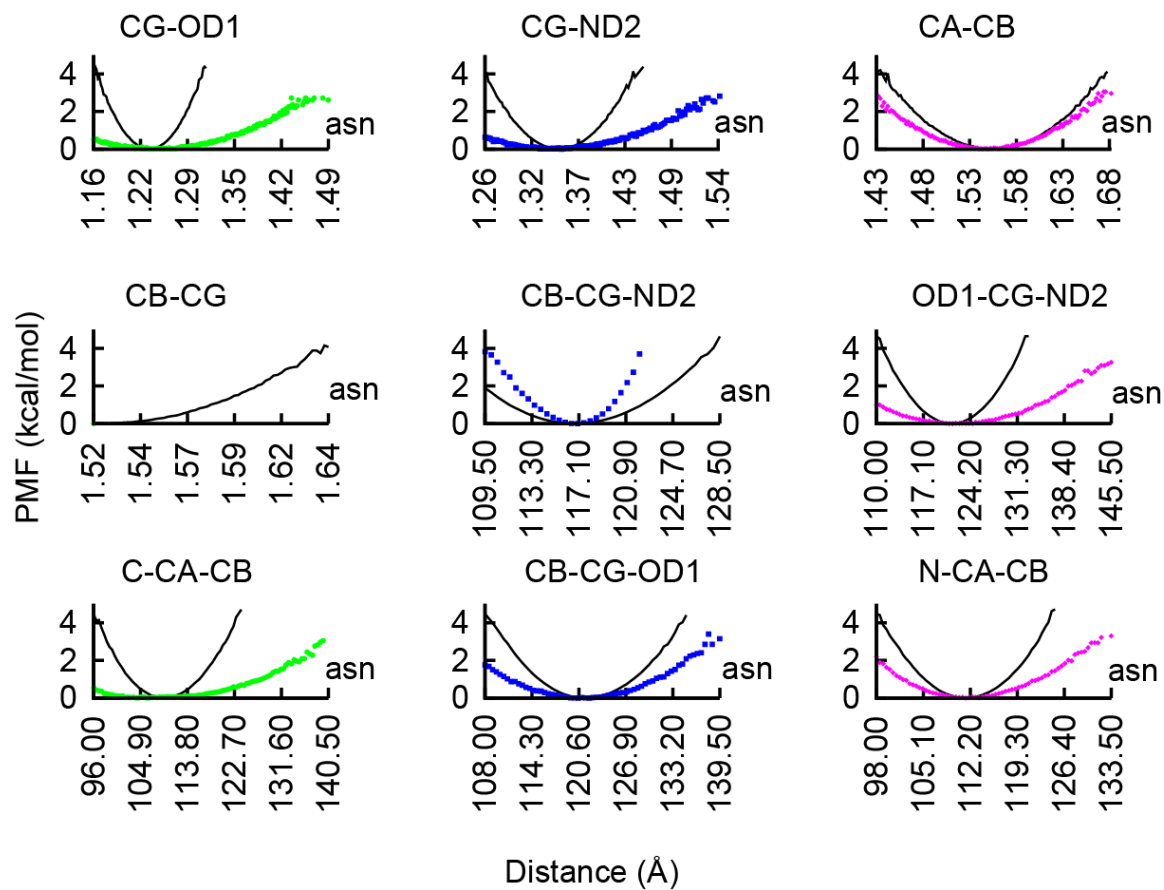

Figure S5: See page S75.

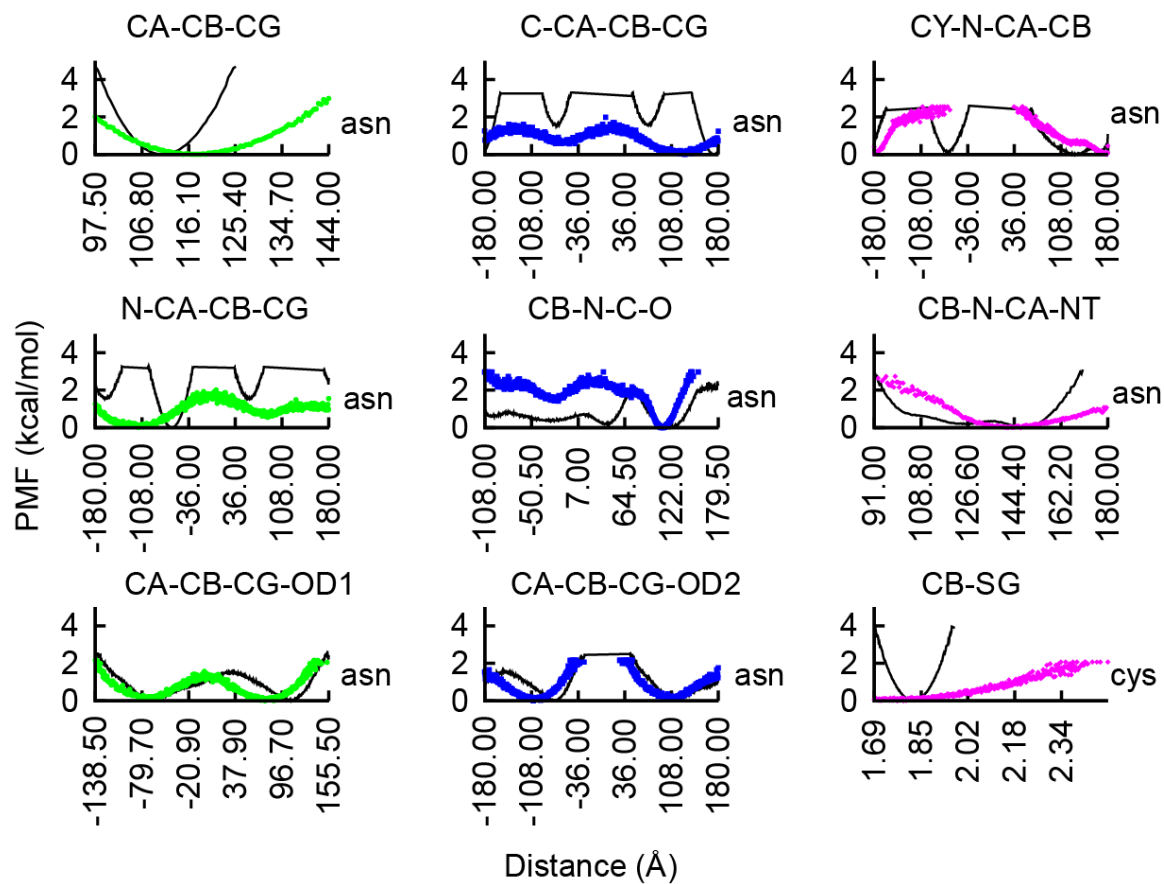

Figure S5: See page S75.

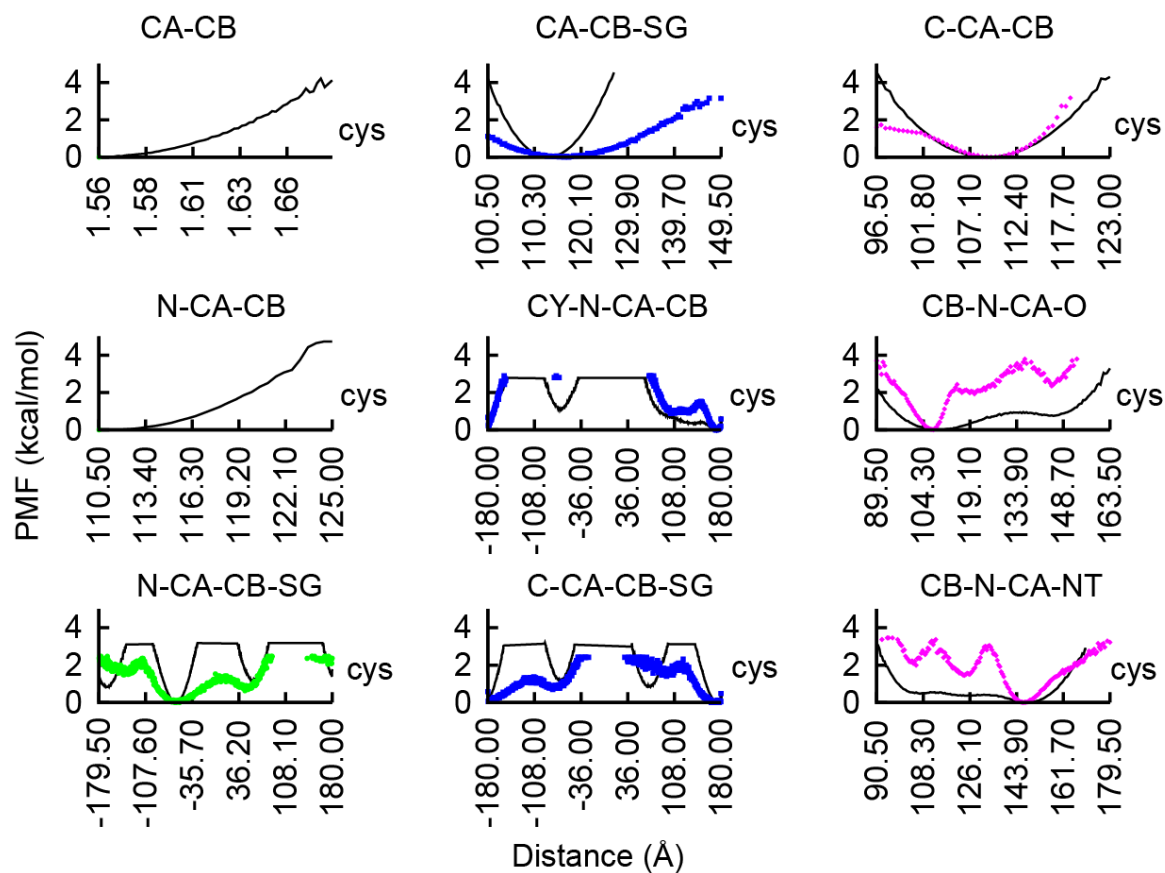

Figure S5: See page S75.

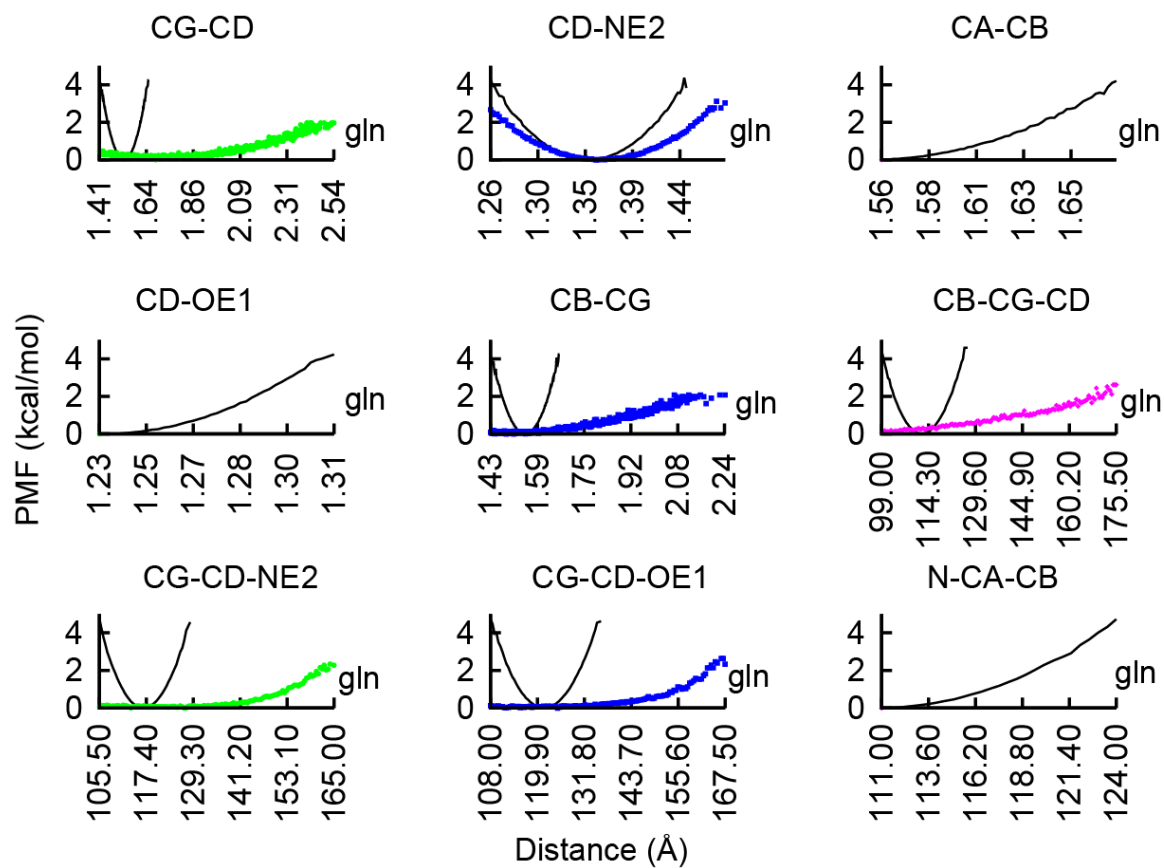

Figure S5: See page S75.

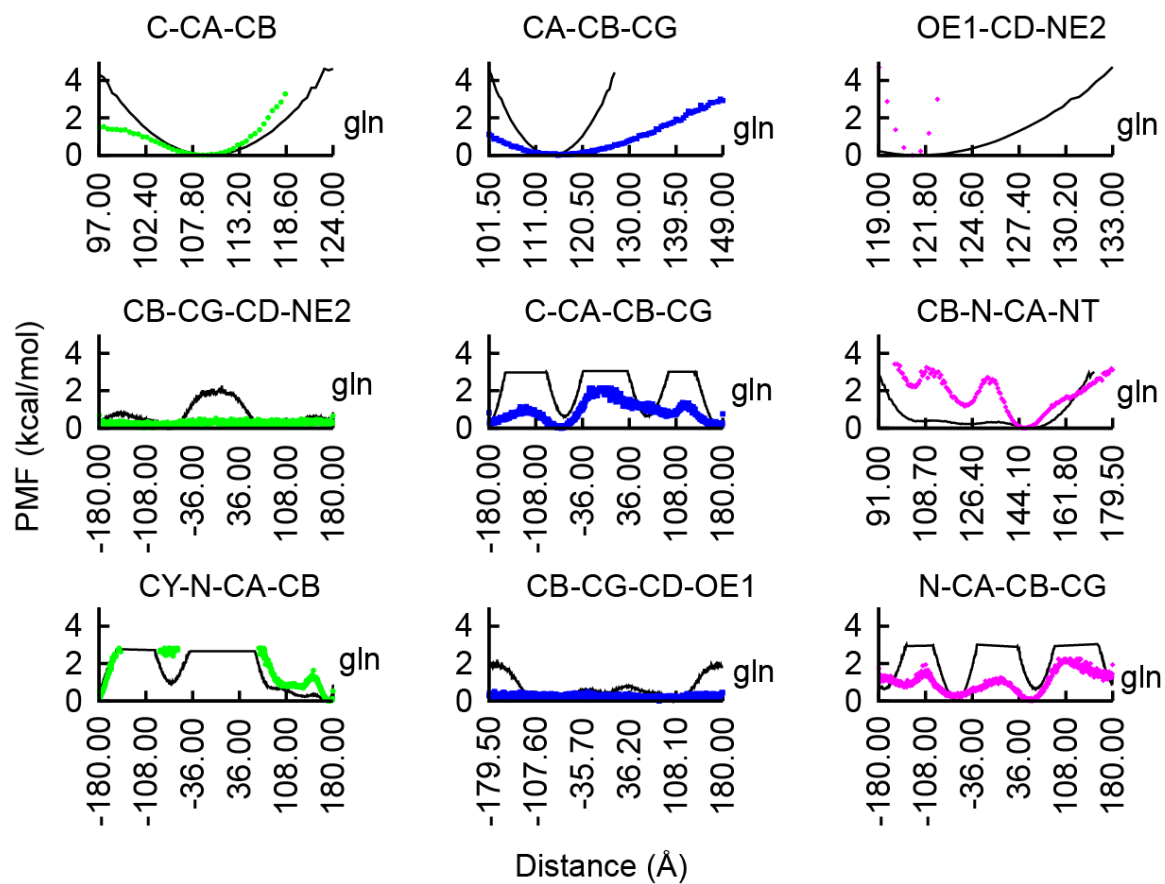

Figure S5: See page S75.

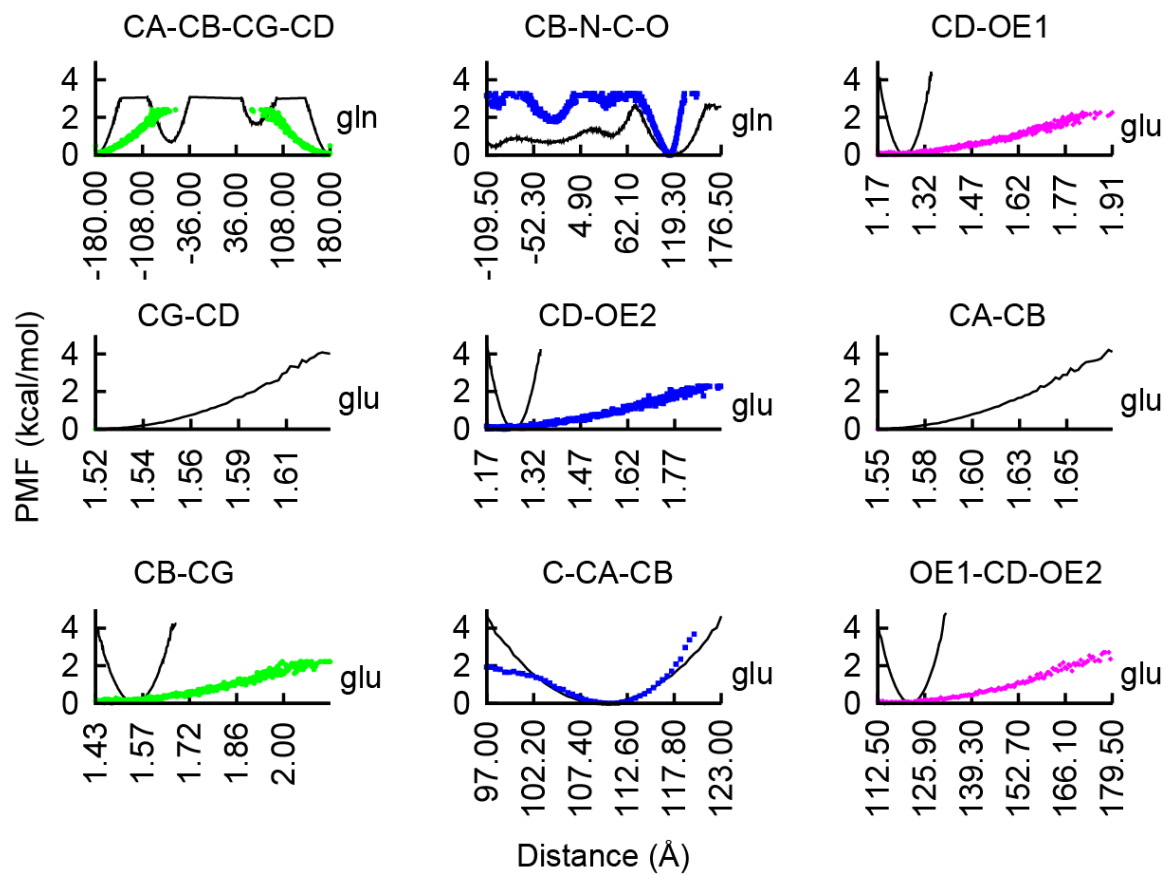

Figure S5: See page S75.



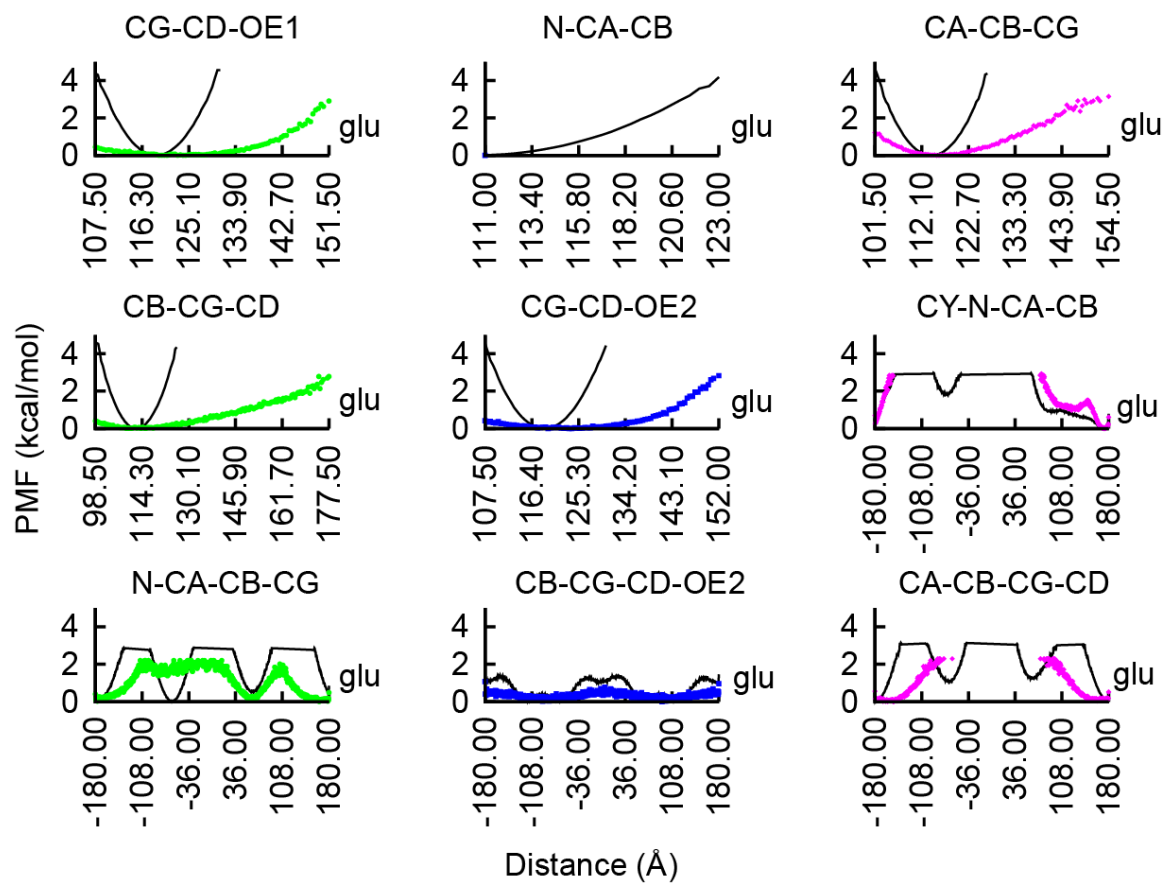

Figure S5: See page S75.

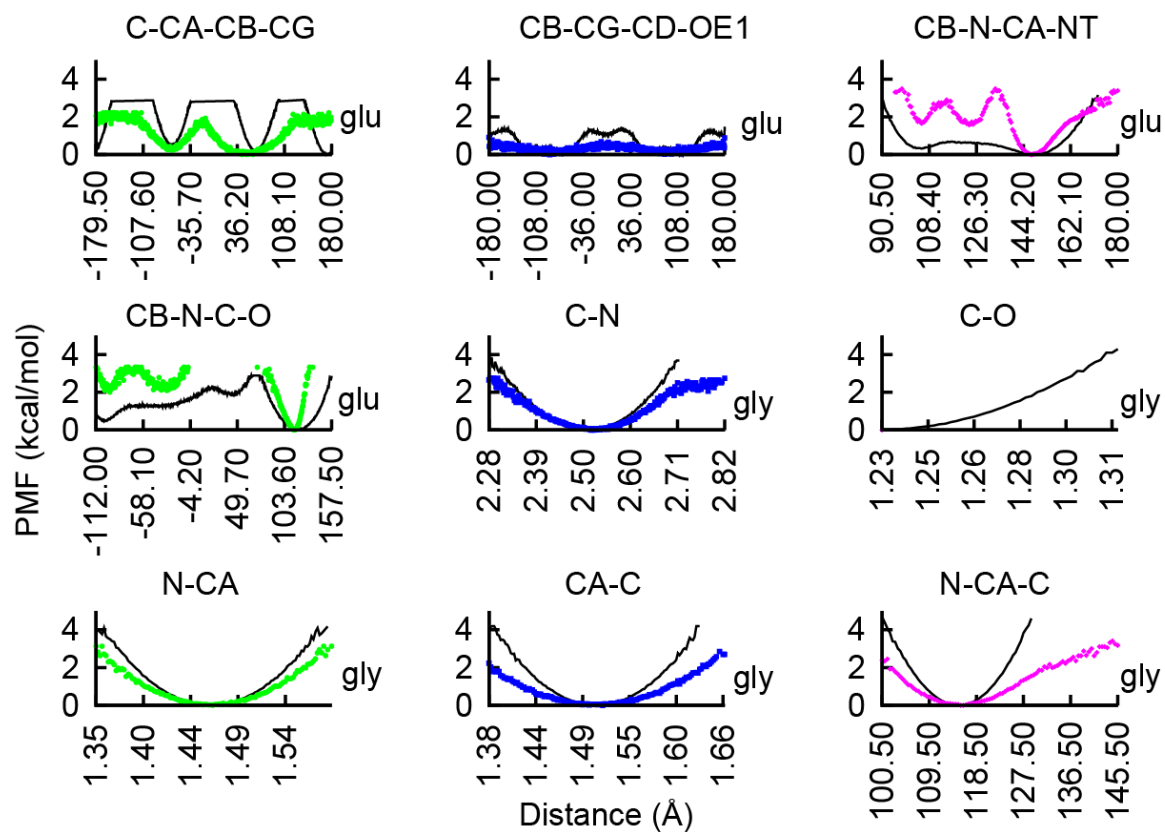

Figure S5: See page S75.

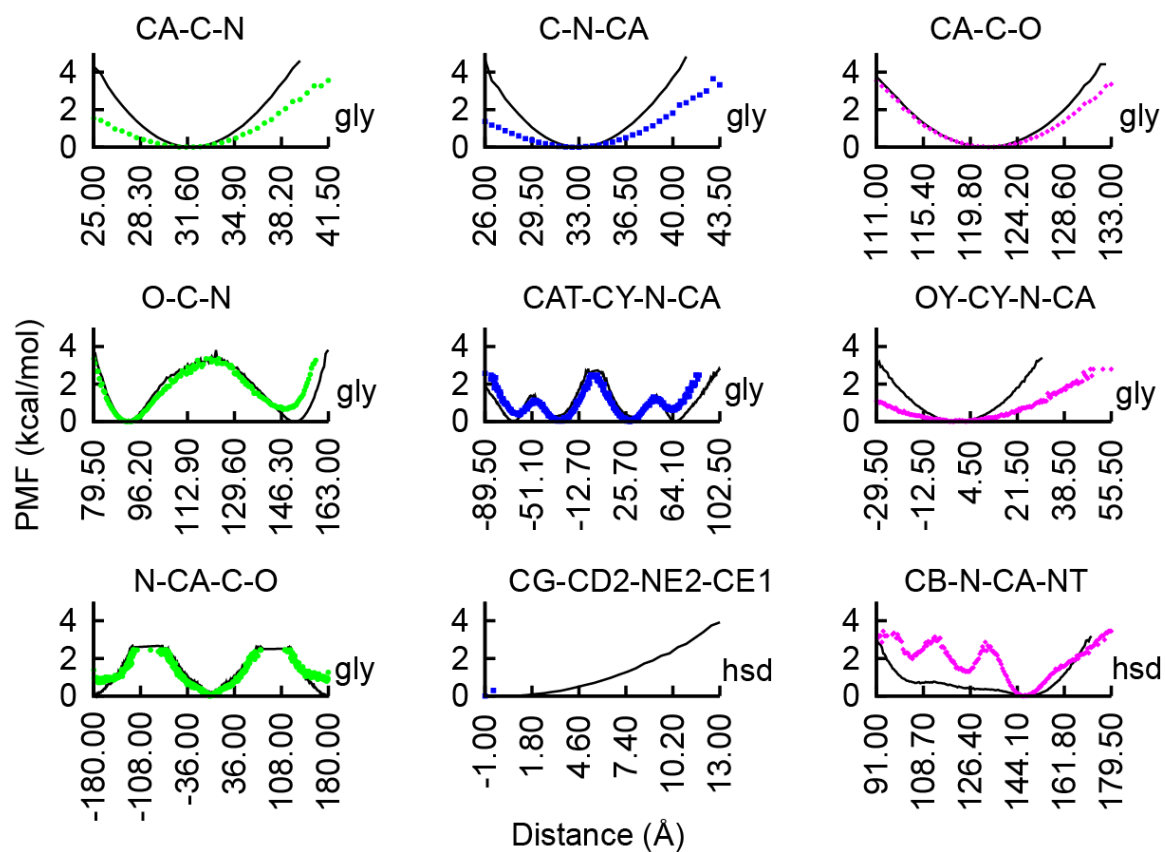

Figure S5: See page S75.

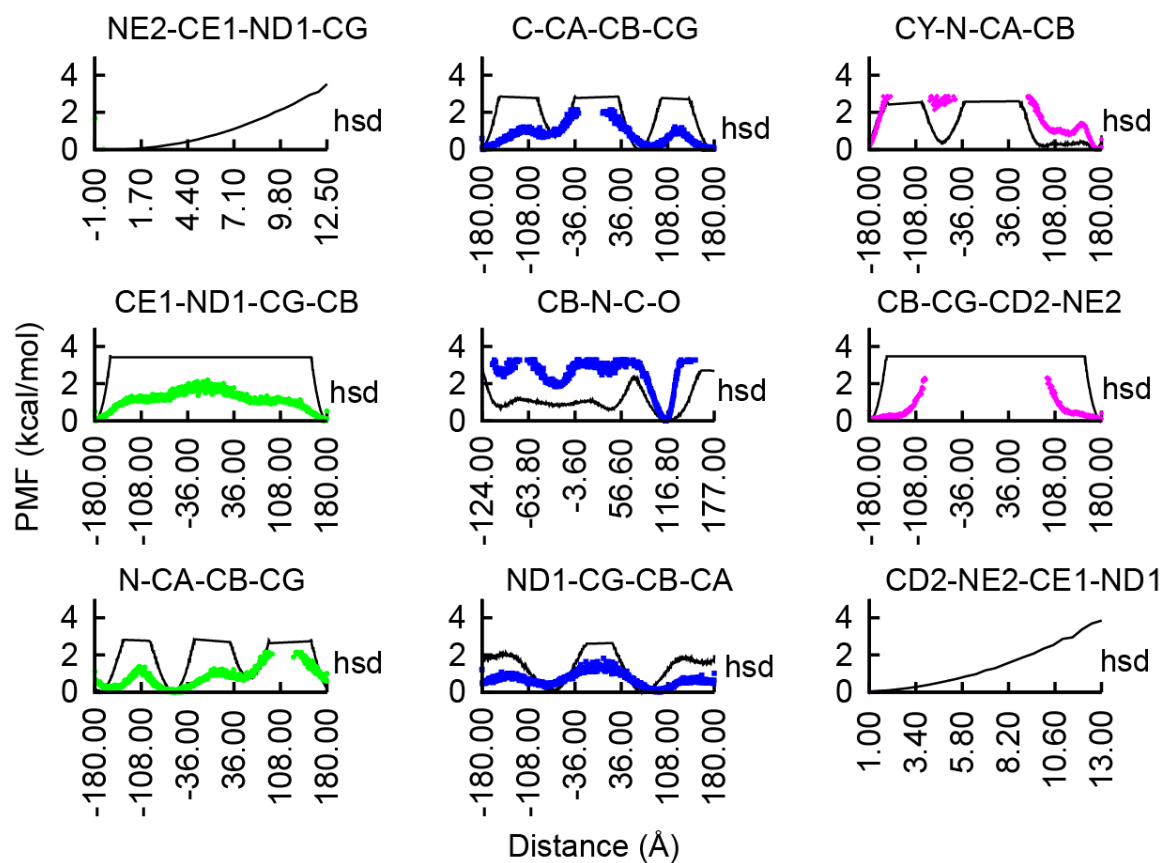

Figure S5: See page S75.

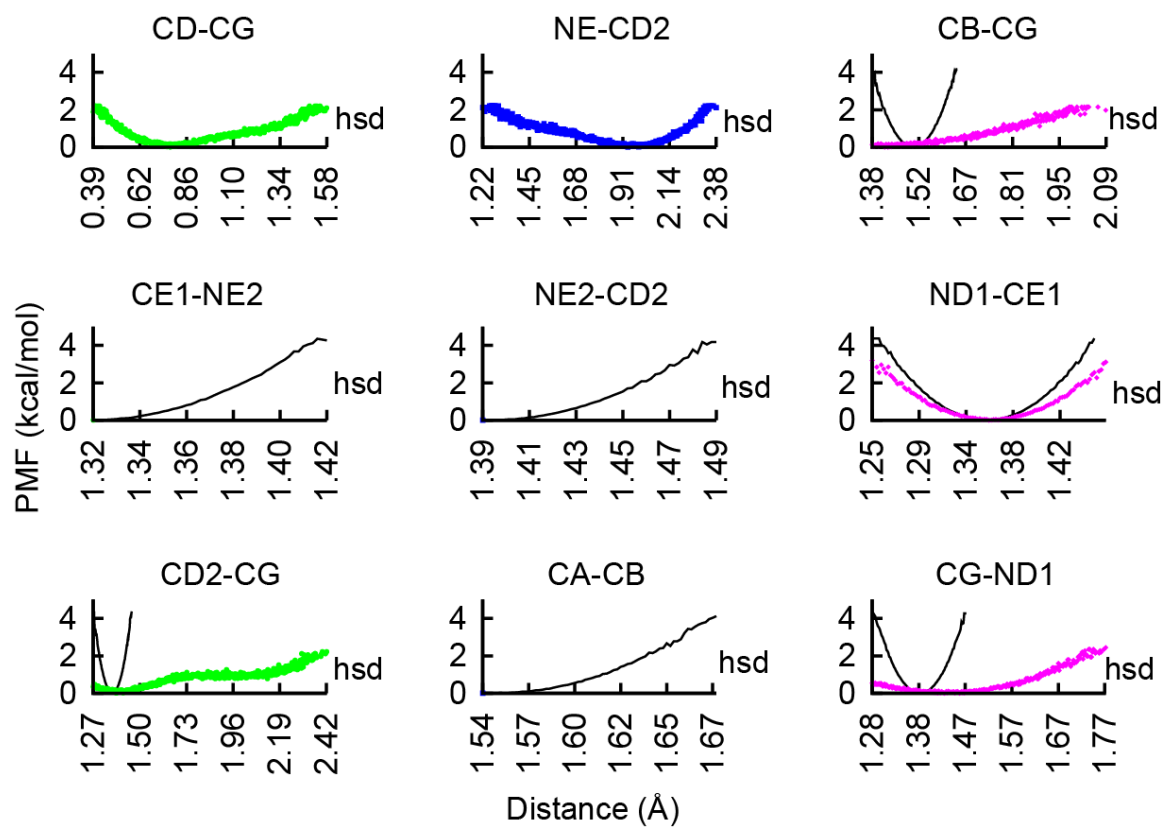

Figure S5: See page S75.

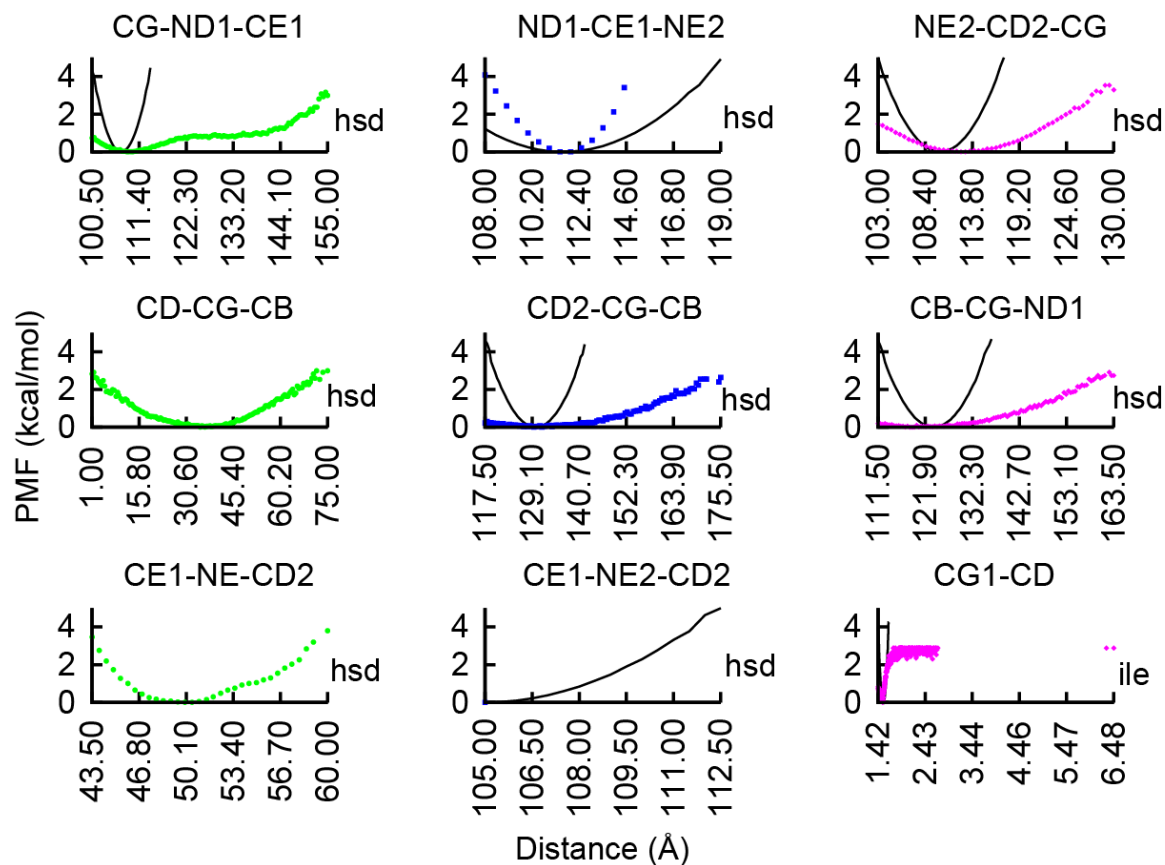

Figure S5: See page S75.

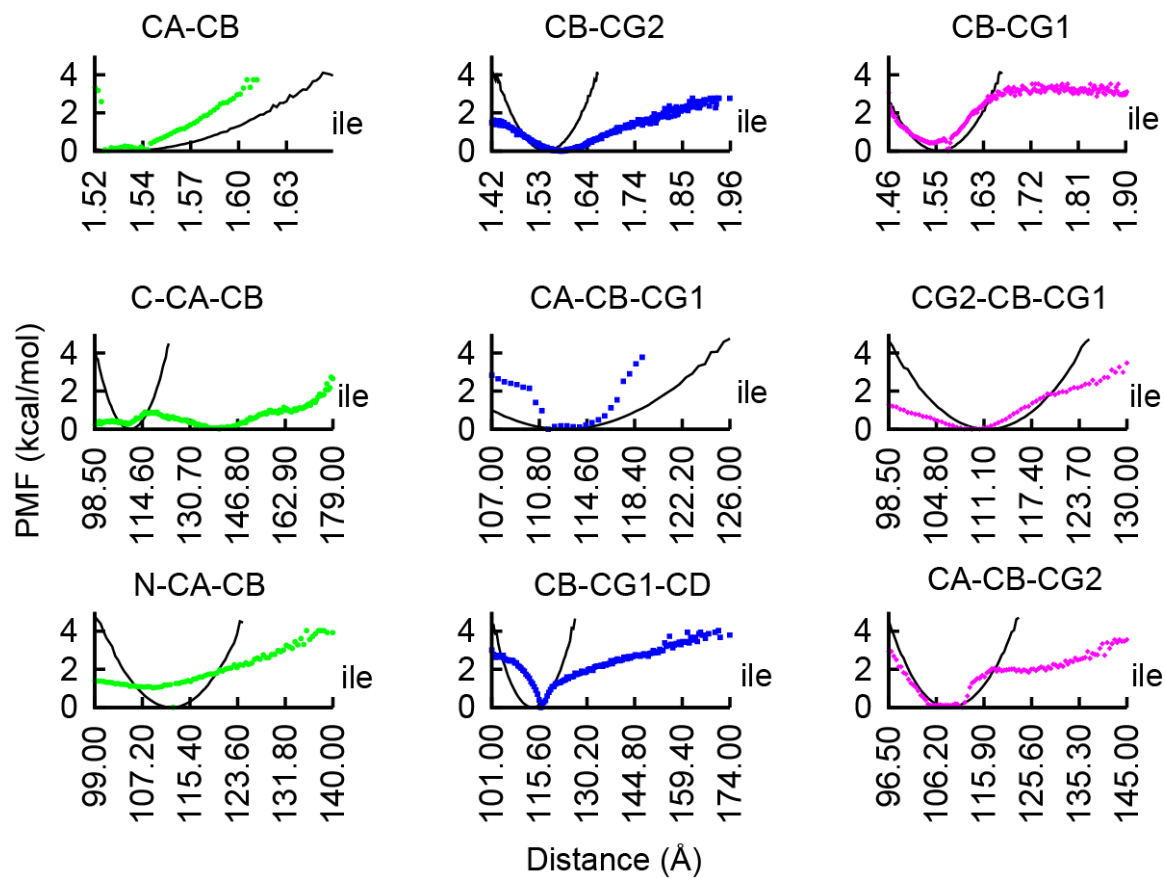

Figure S5: See page S75.

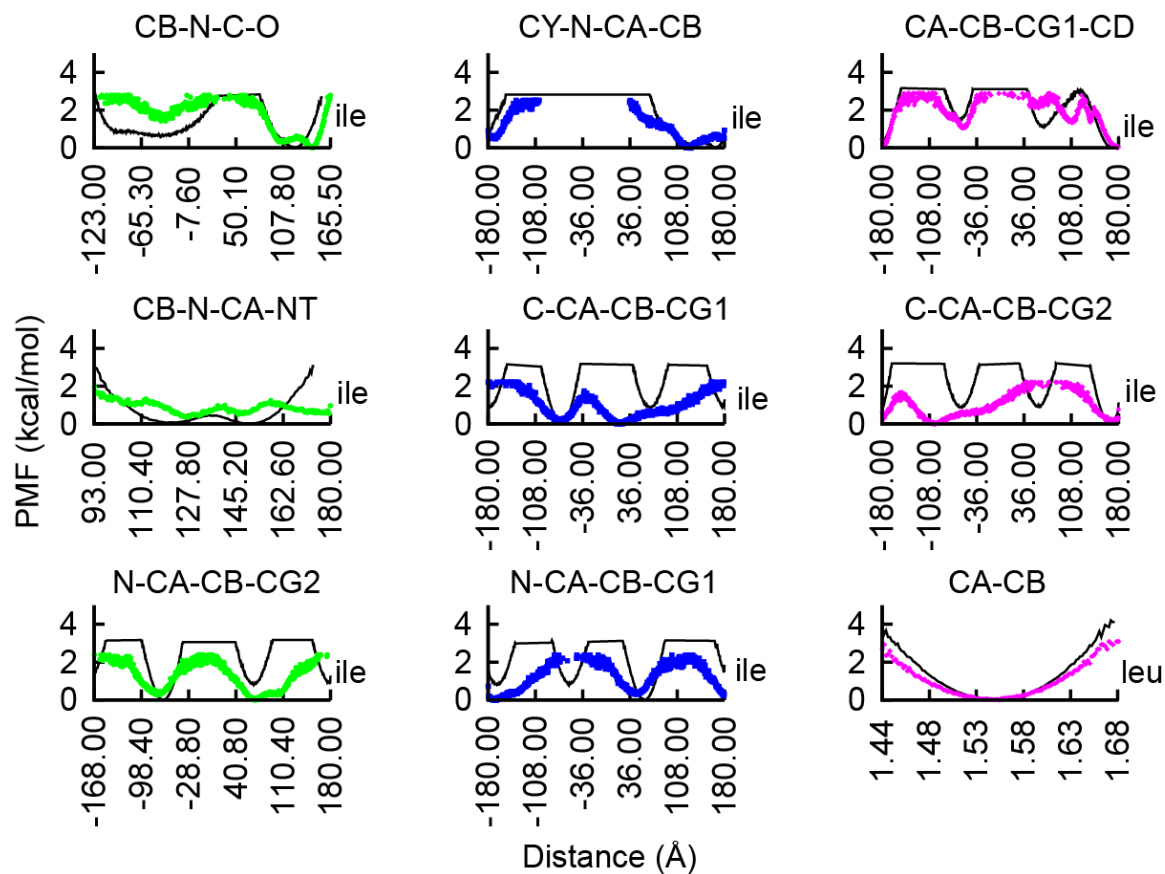

Figure S5: See page S75.



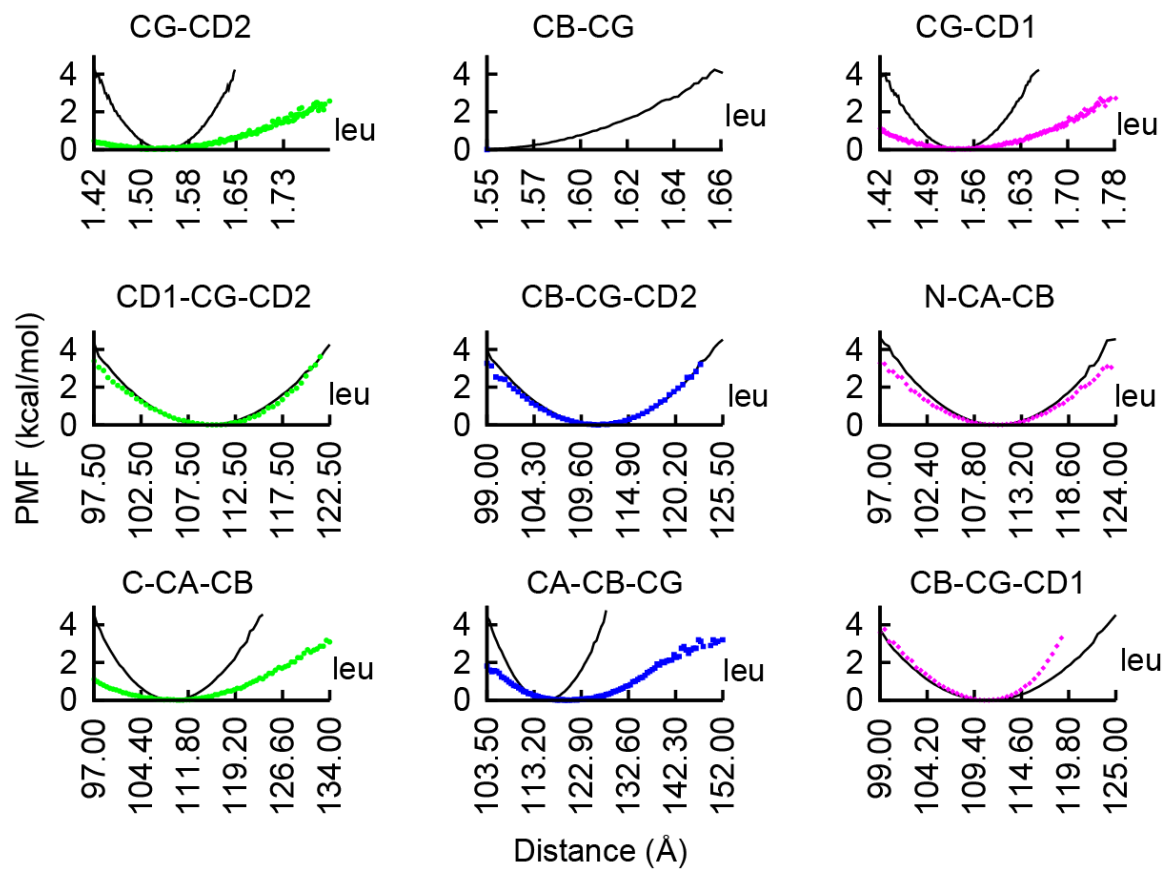

Figure S6: See page S75.

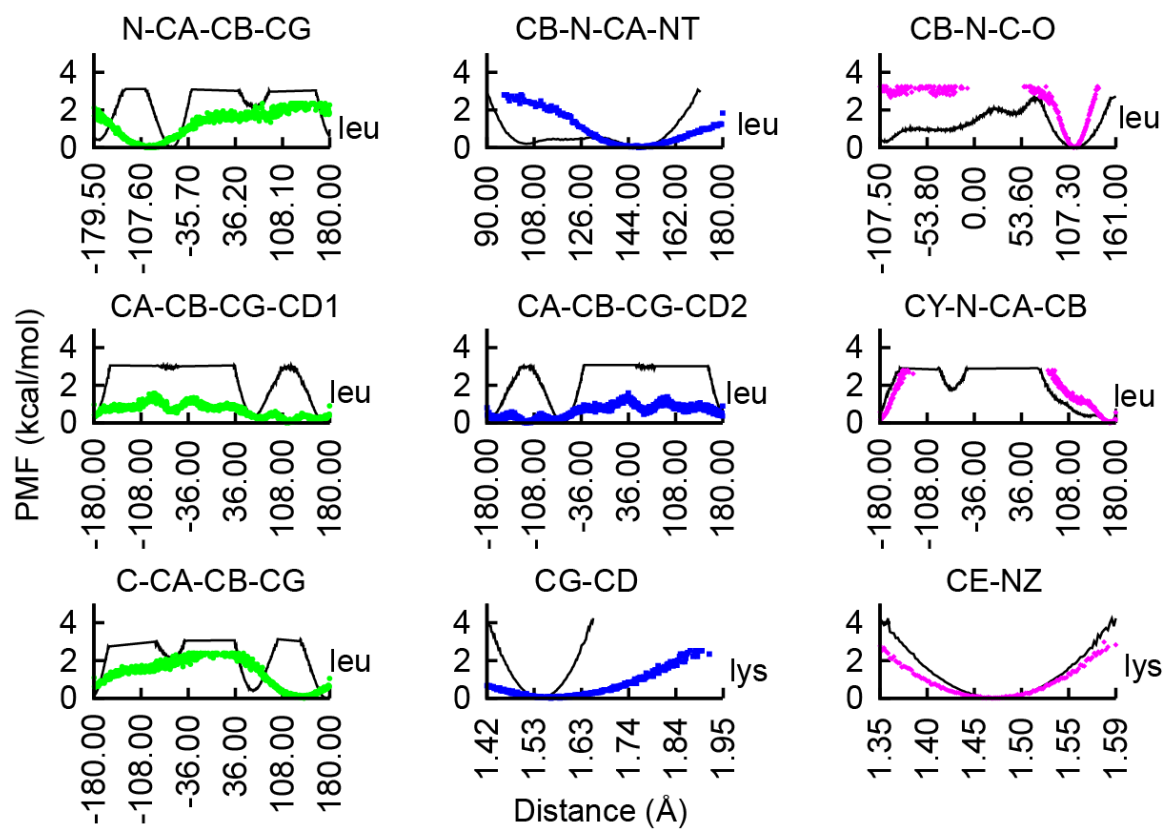

Figure S5: See page S75.

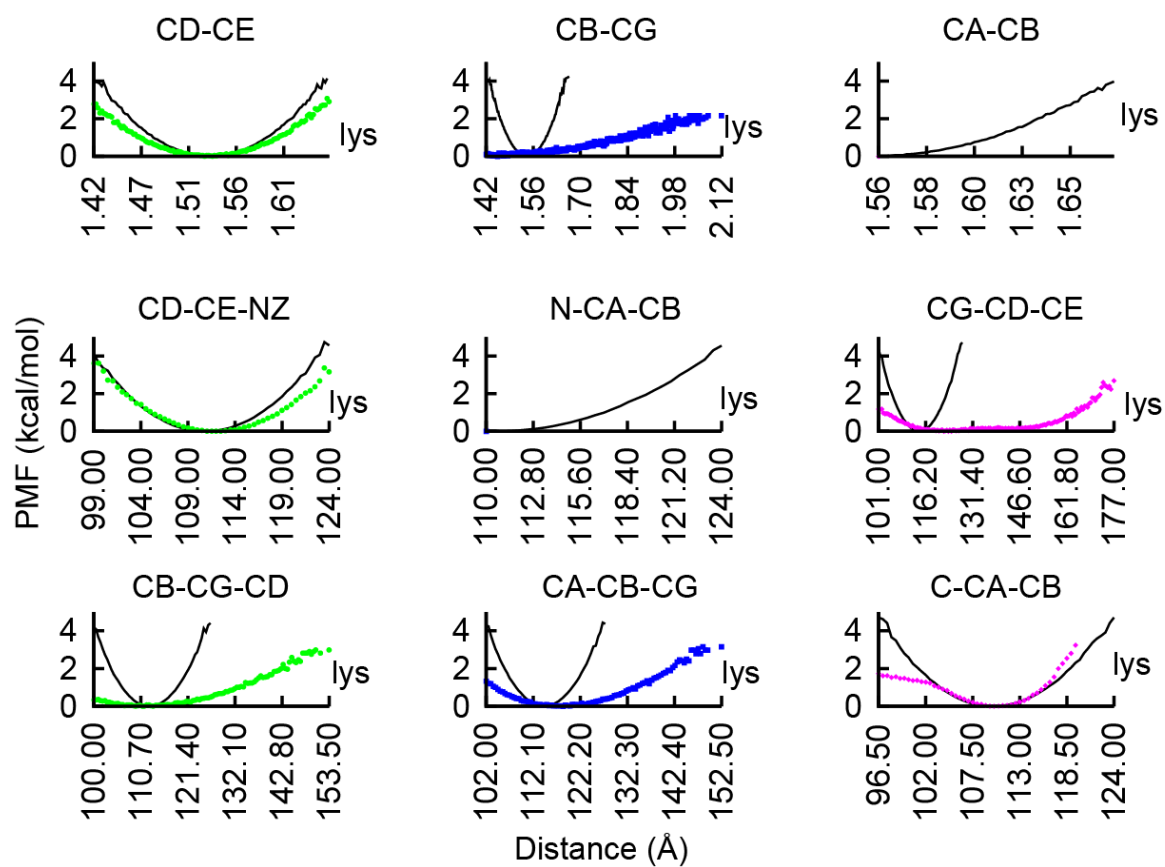

Figure S5: See page S75.

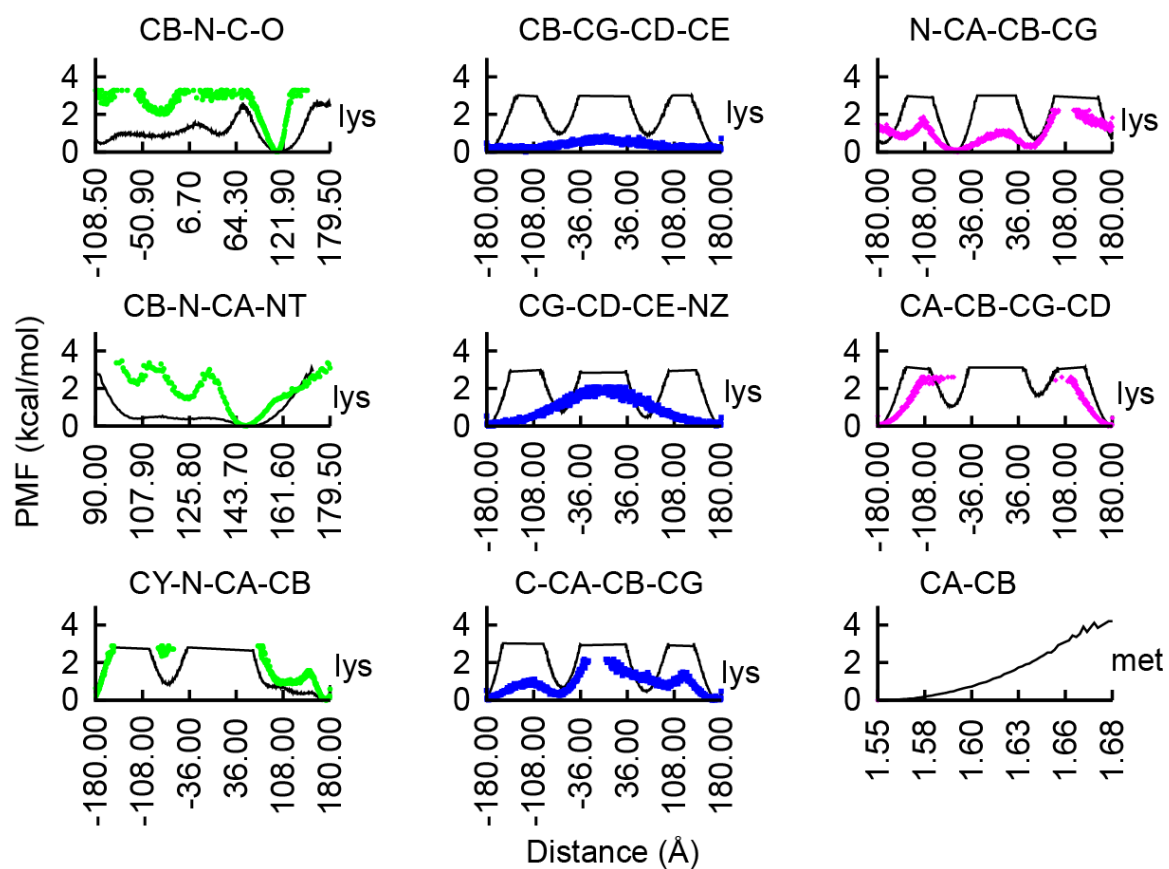

Figure S5: See page S75.

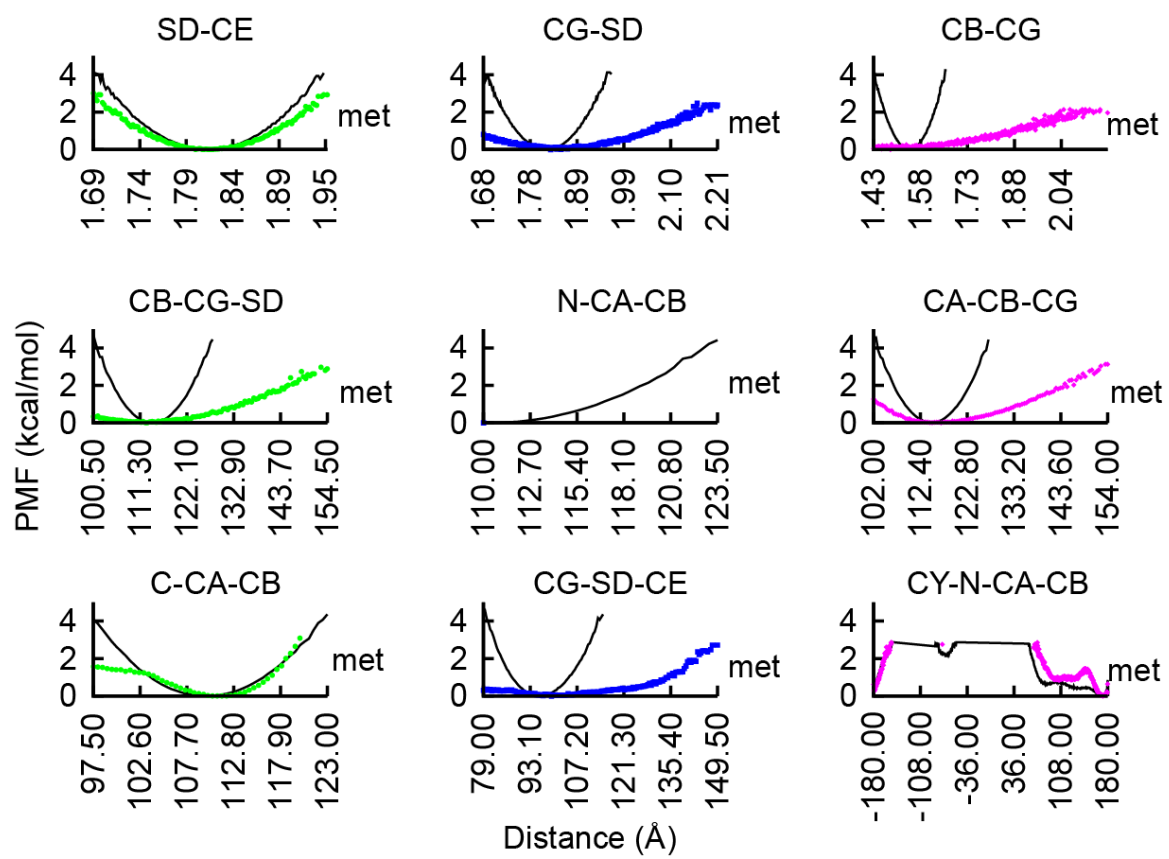

Figure S5: See page S75.

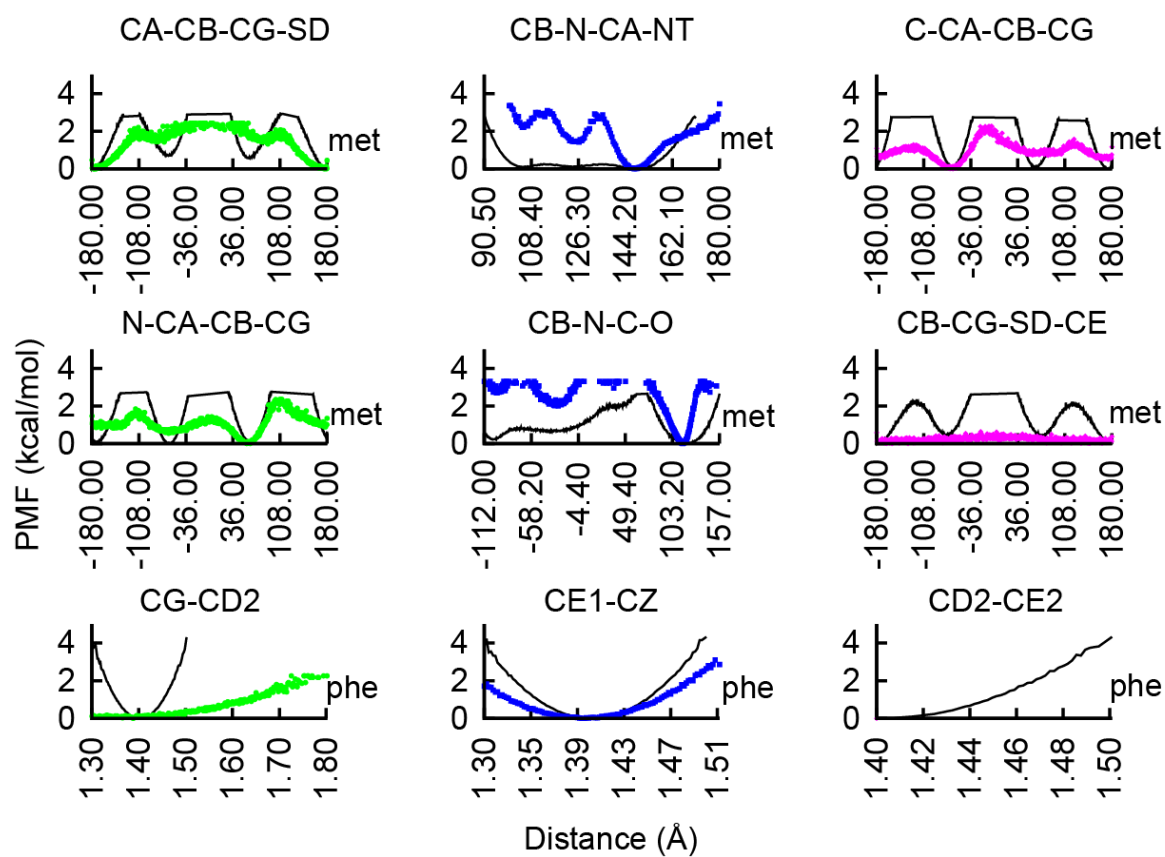

Figure S5: See page S75.

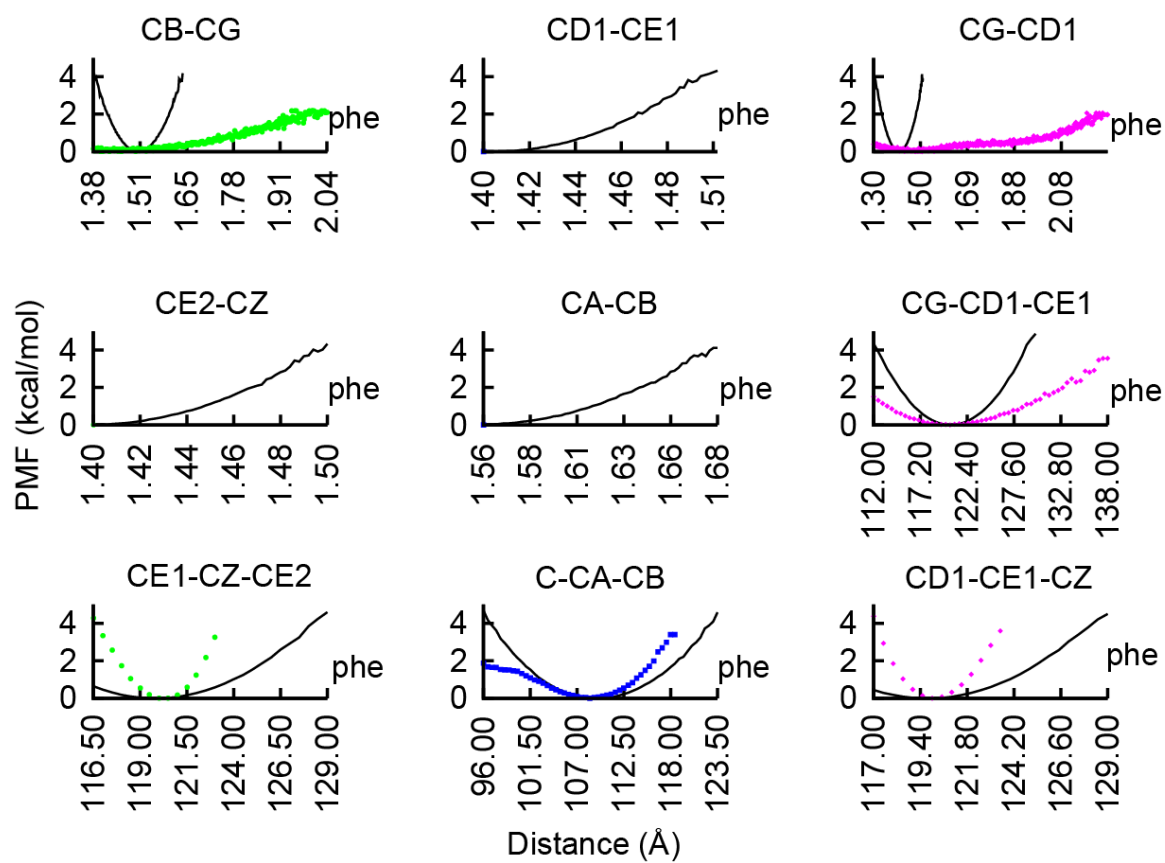

Figure S5: See page S75.

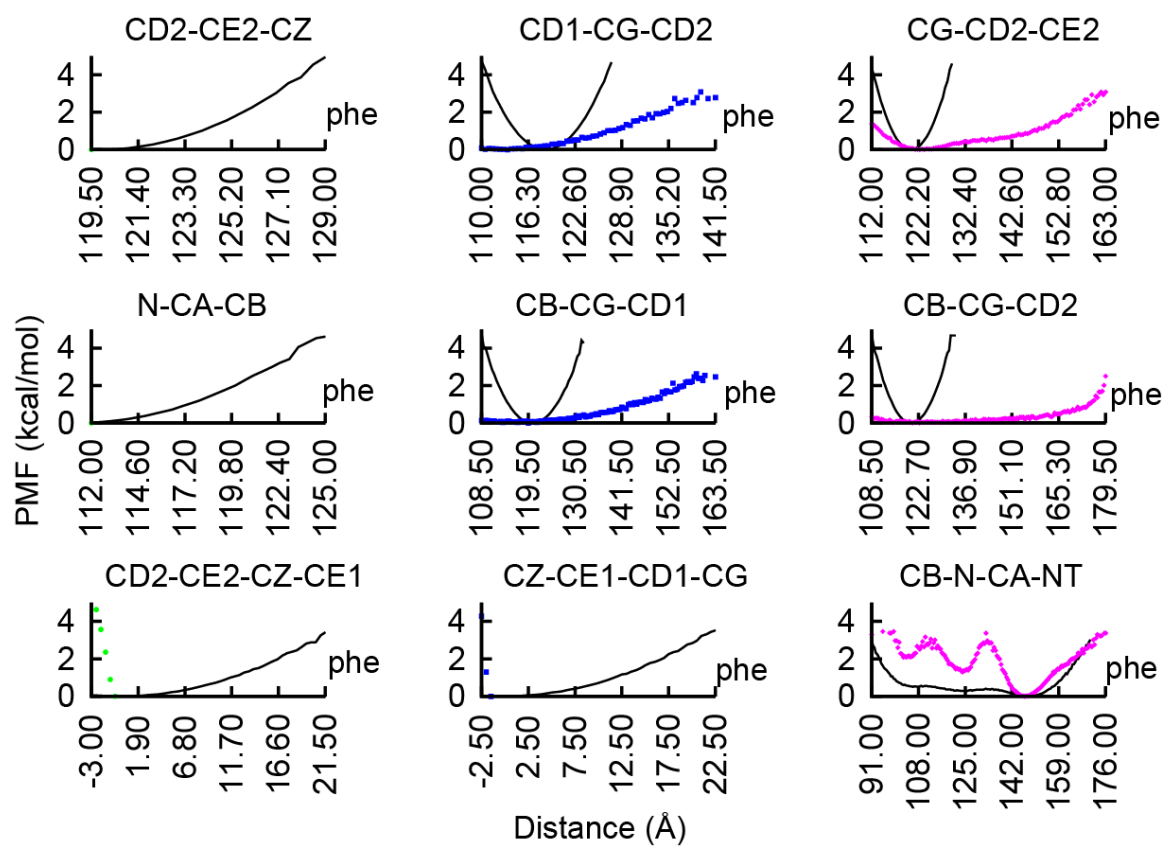

Figure S5: See page S75.



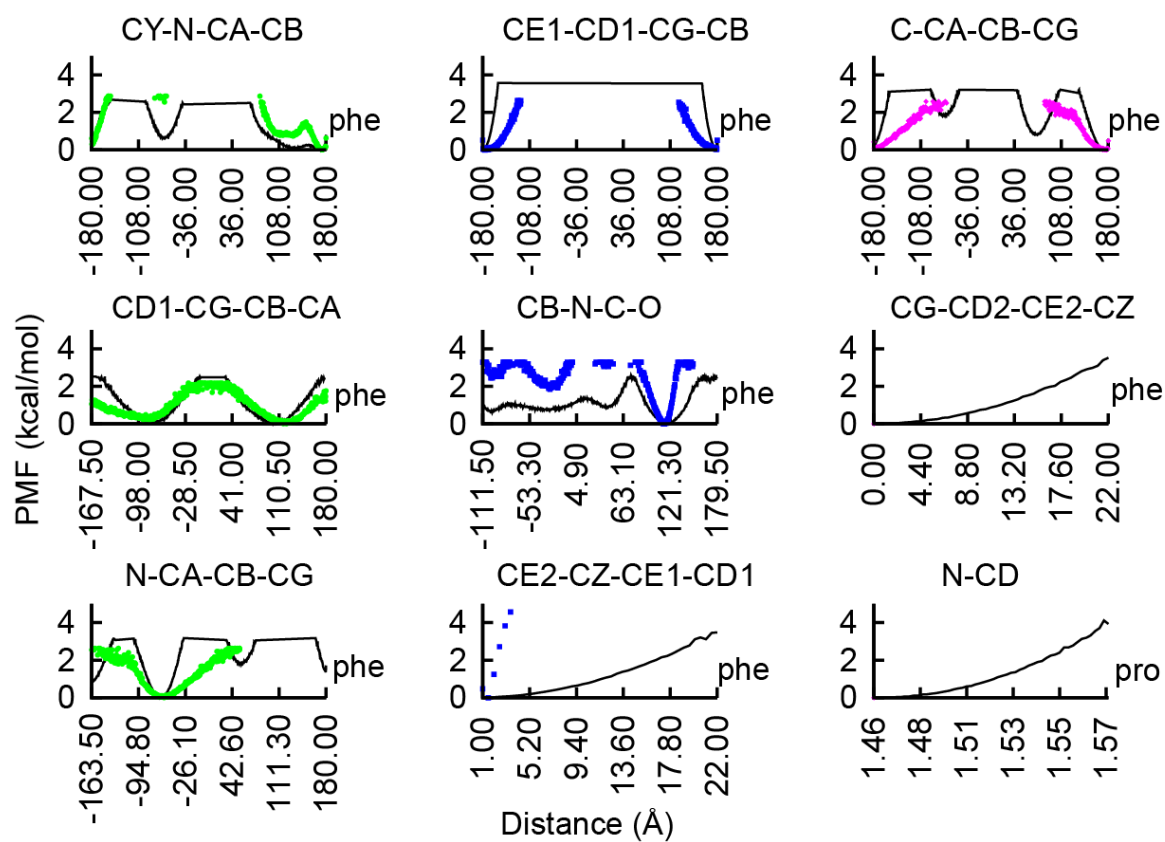

Figure S5: See page S75.

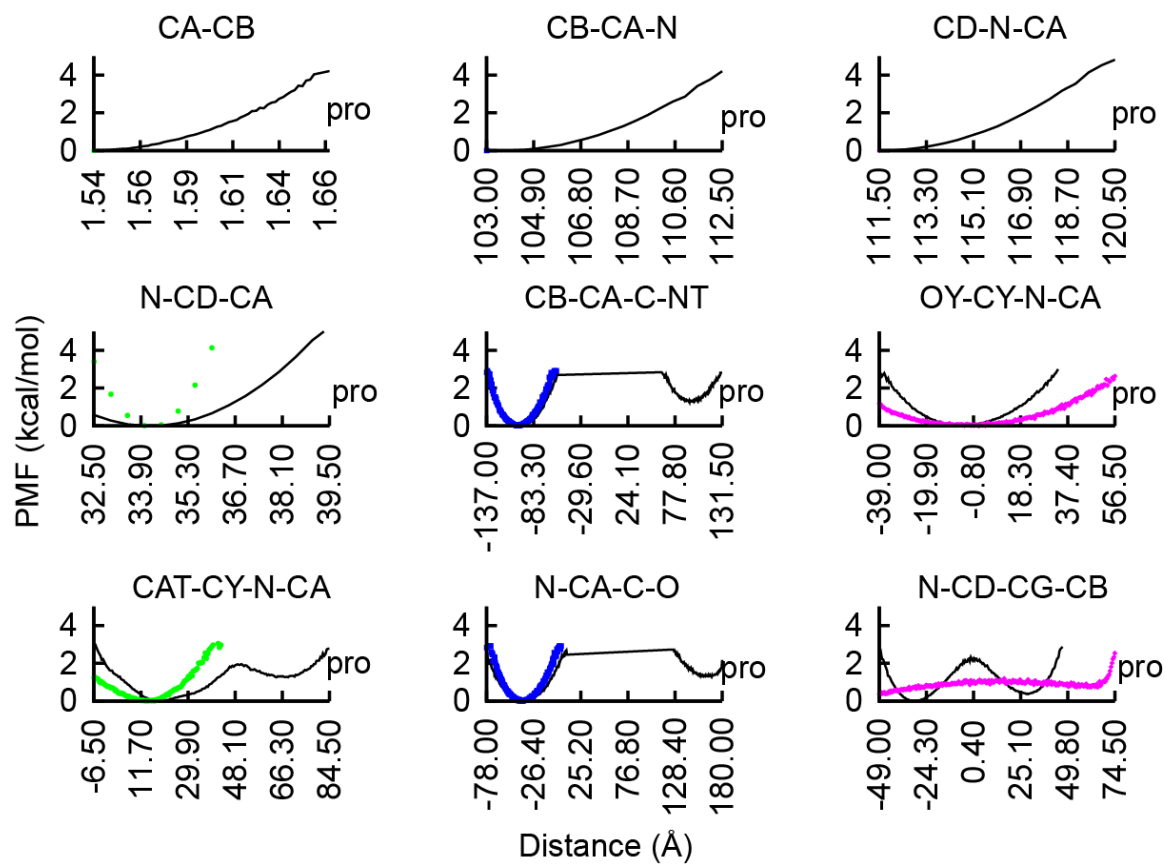

Figure S5: See page S75.

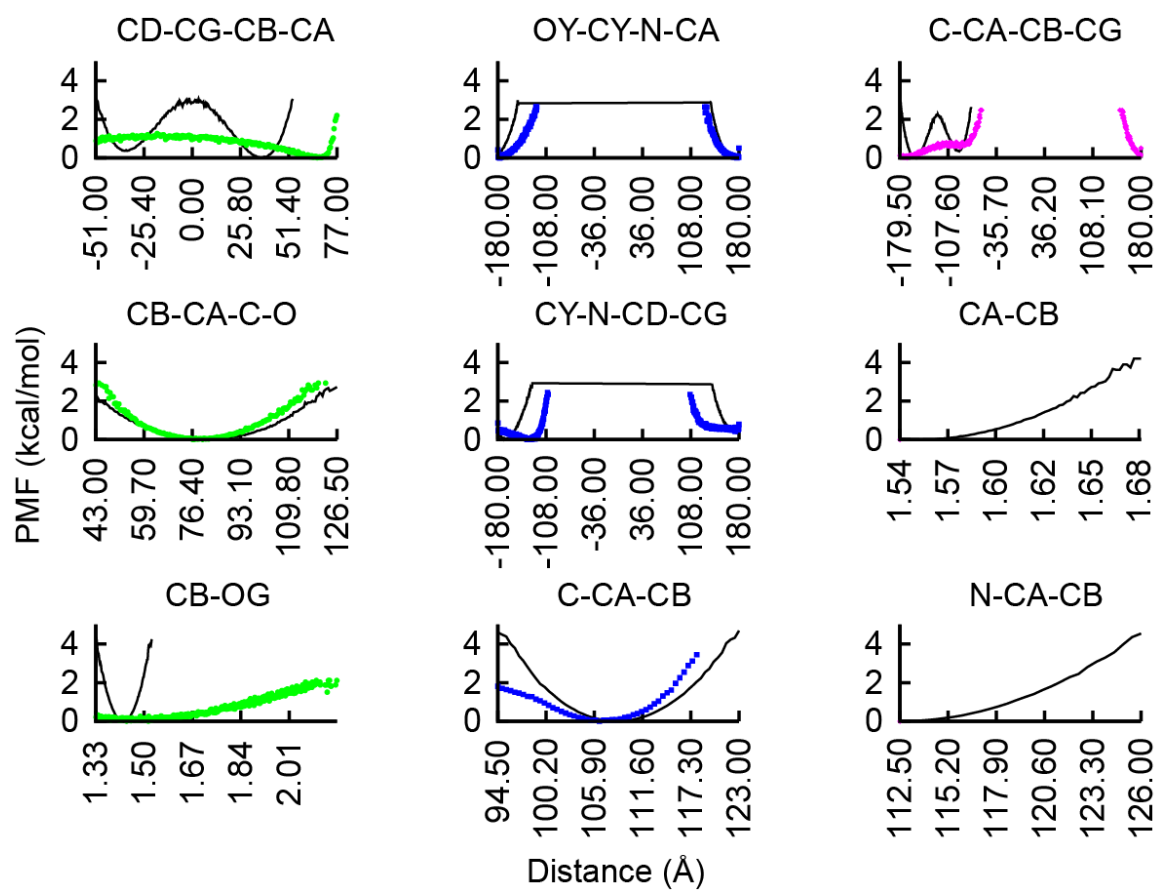

Figure S5: See page S75.

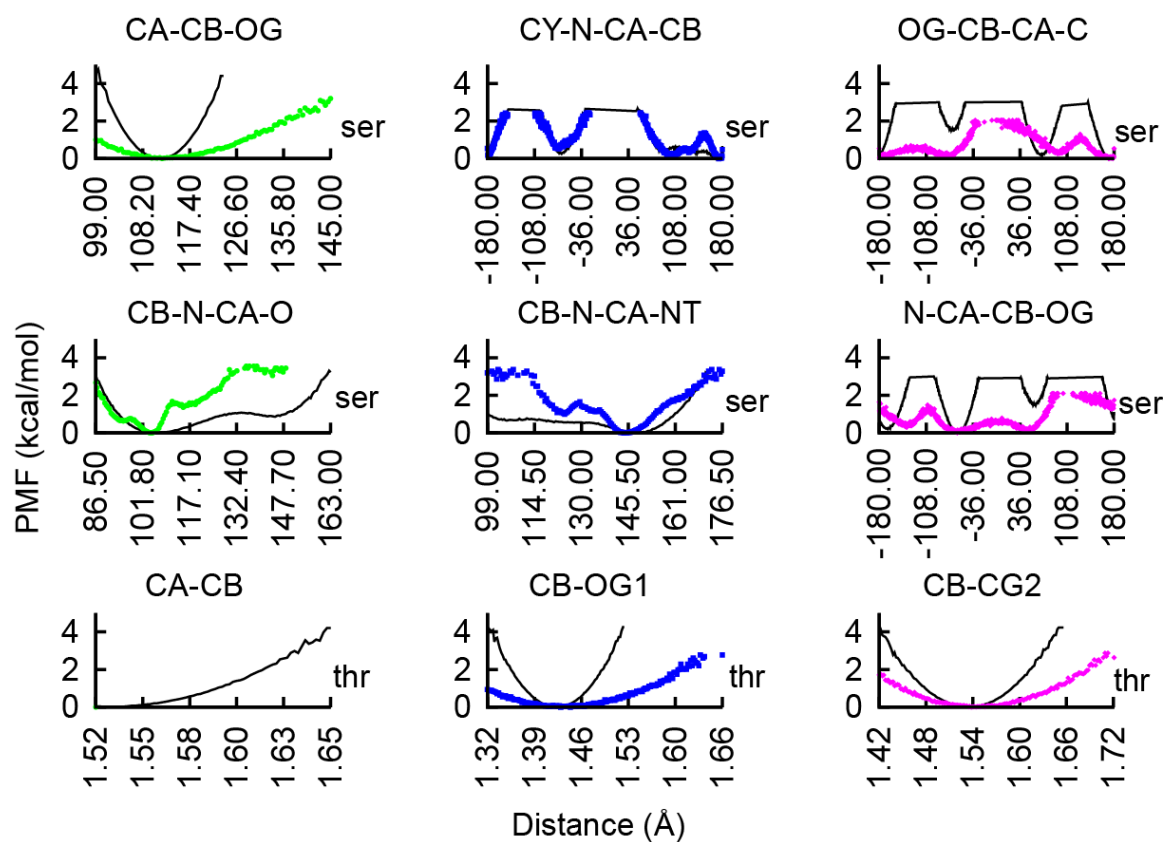

Figure S5: See page S75.

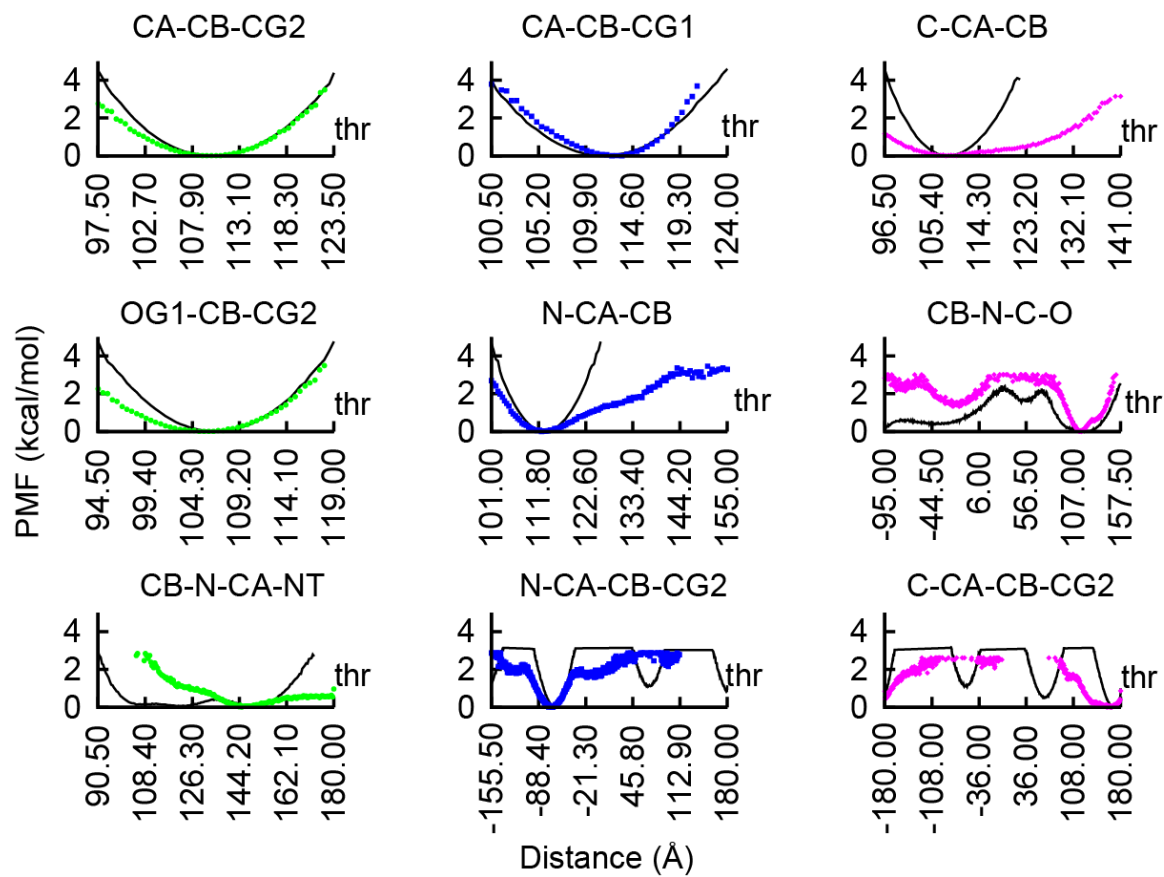

Figure S5: See page S75.

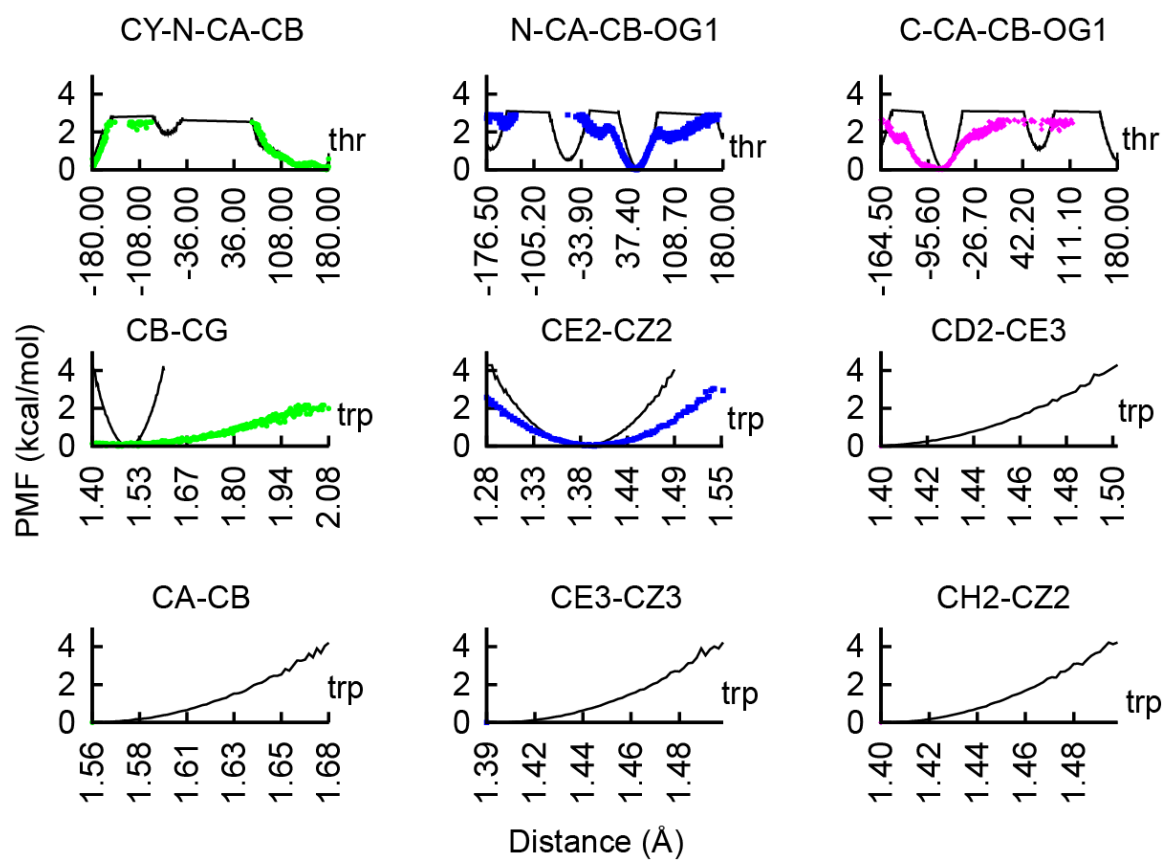

Figure S5: See page S75.

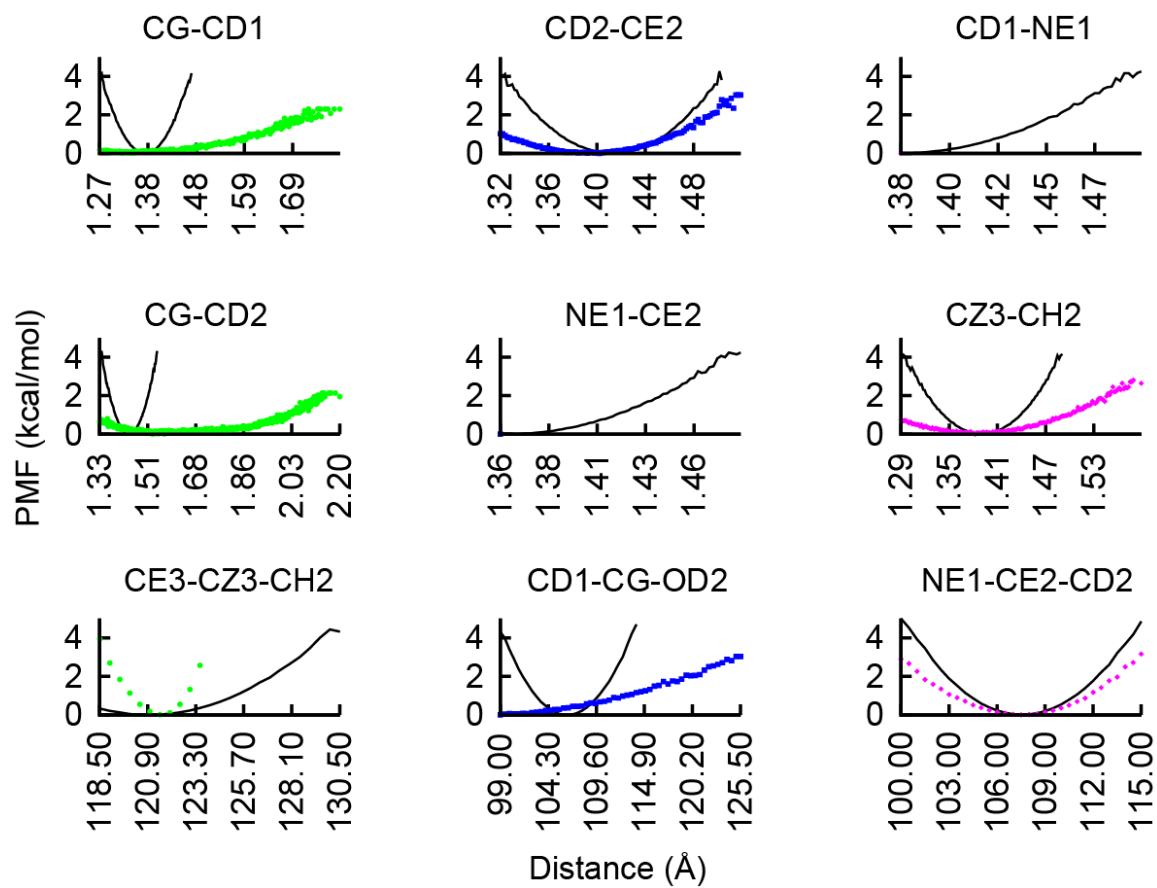

Figure S5: See page S75.

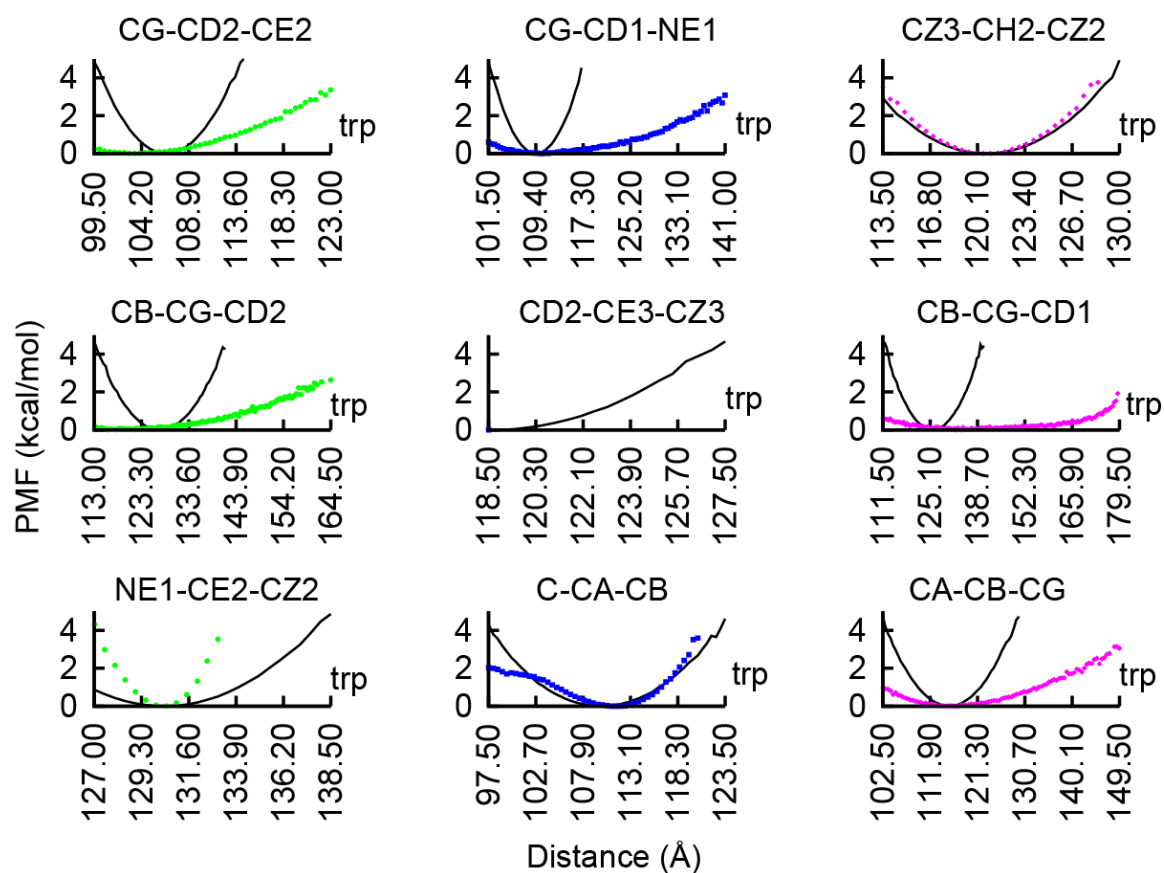

Figure S5: See page S75.



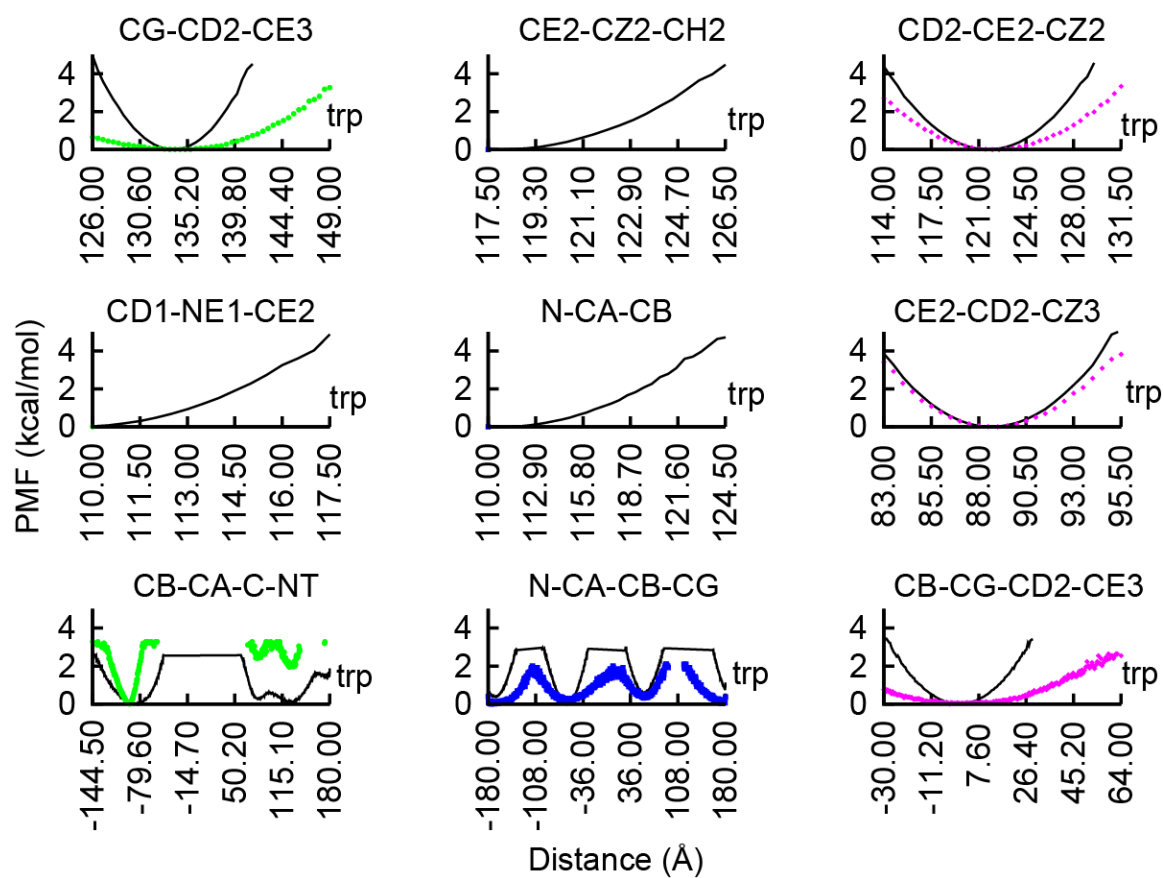

Figure S5: See page S75.

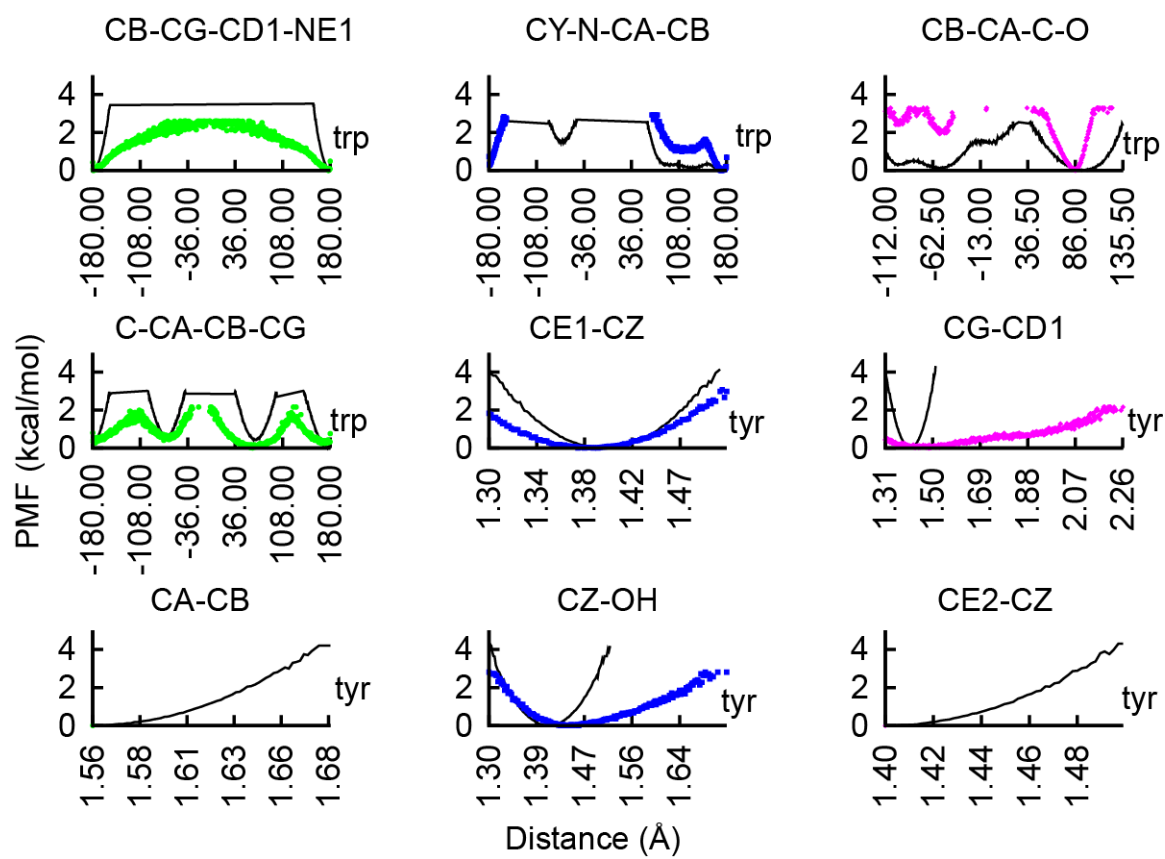

Figure S5: See page S75.

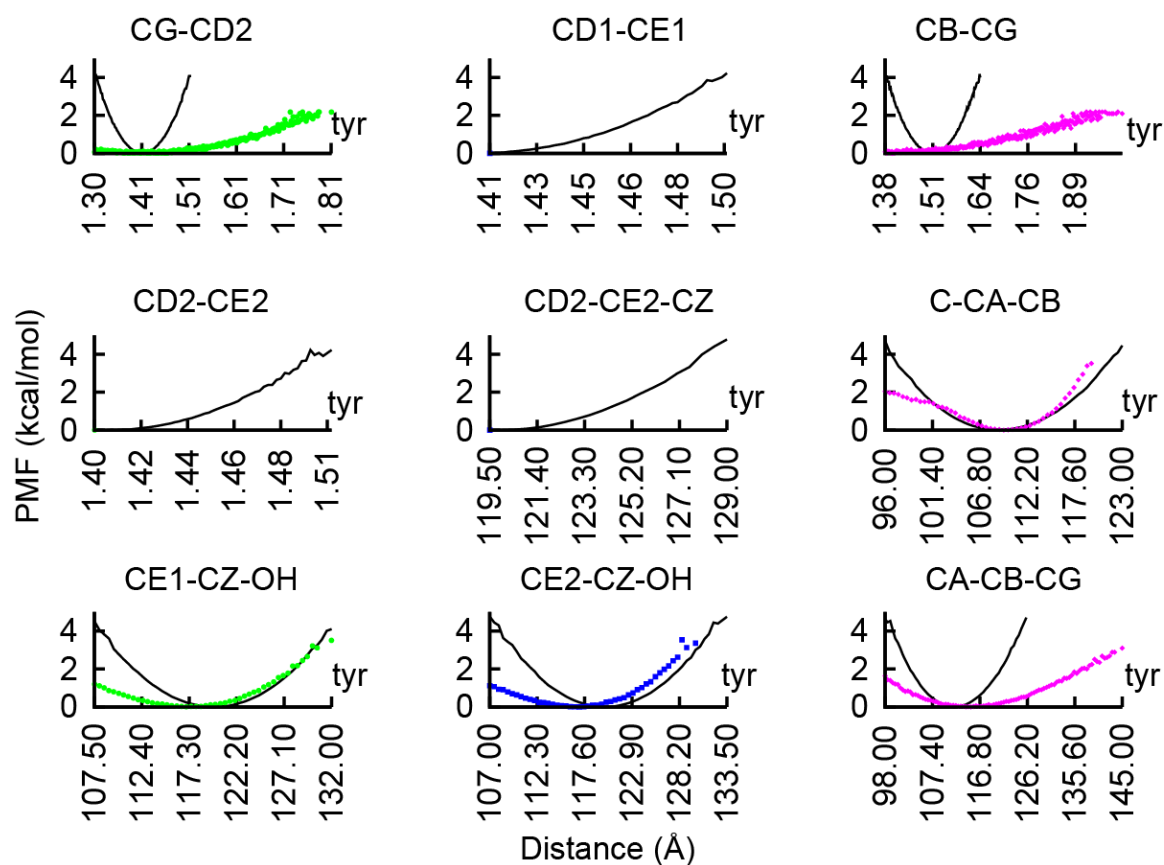

Figure S5: See page S75.

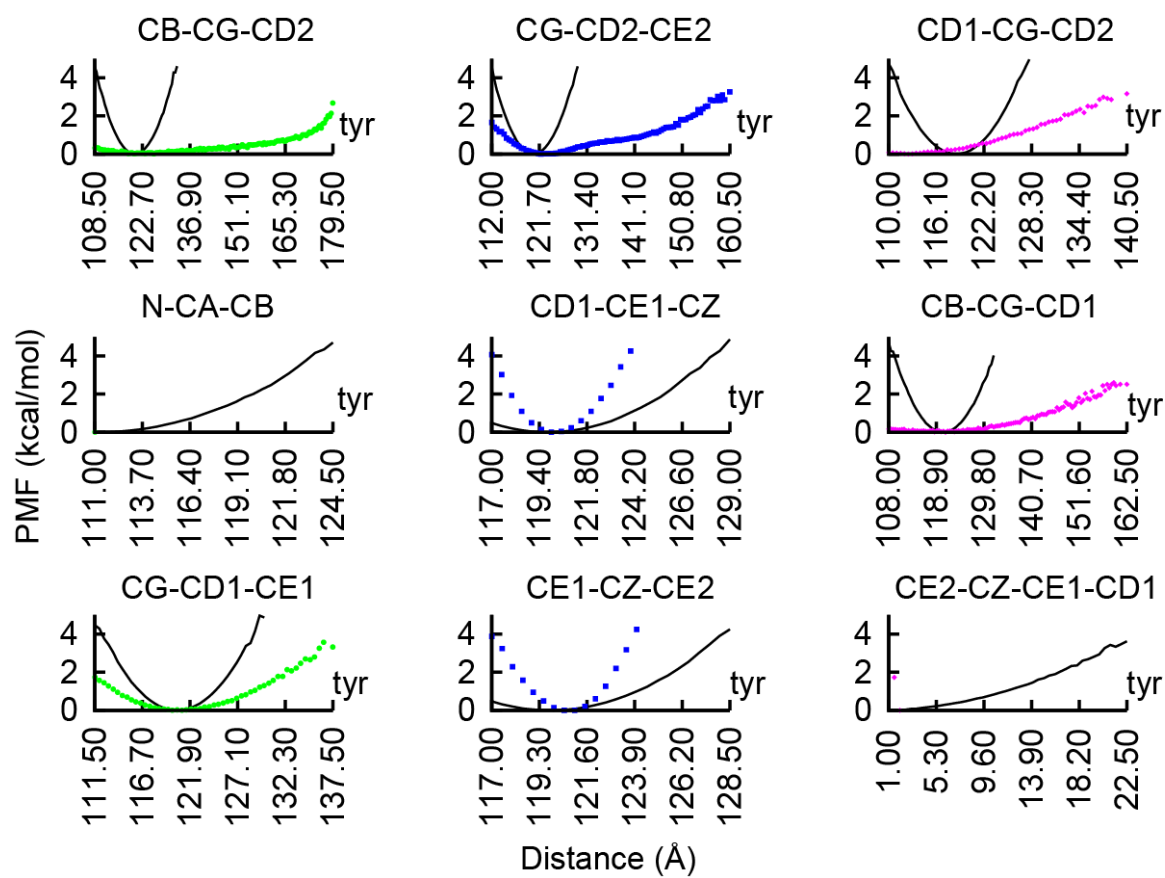

Figure S5: See page S75.

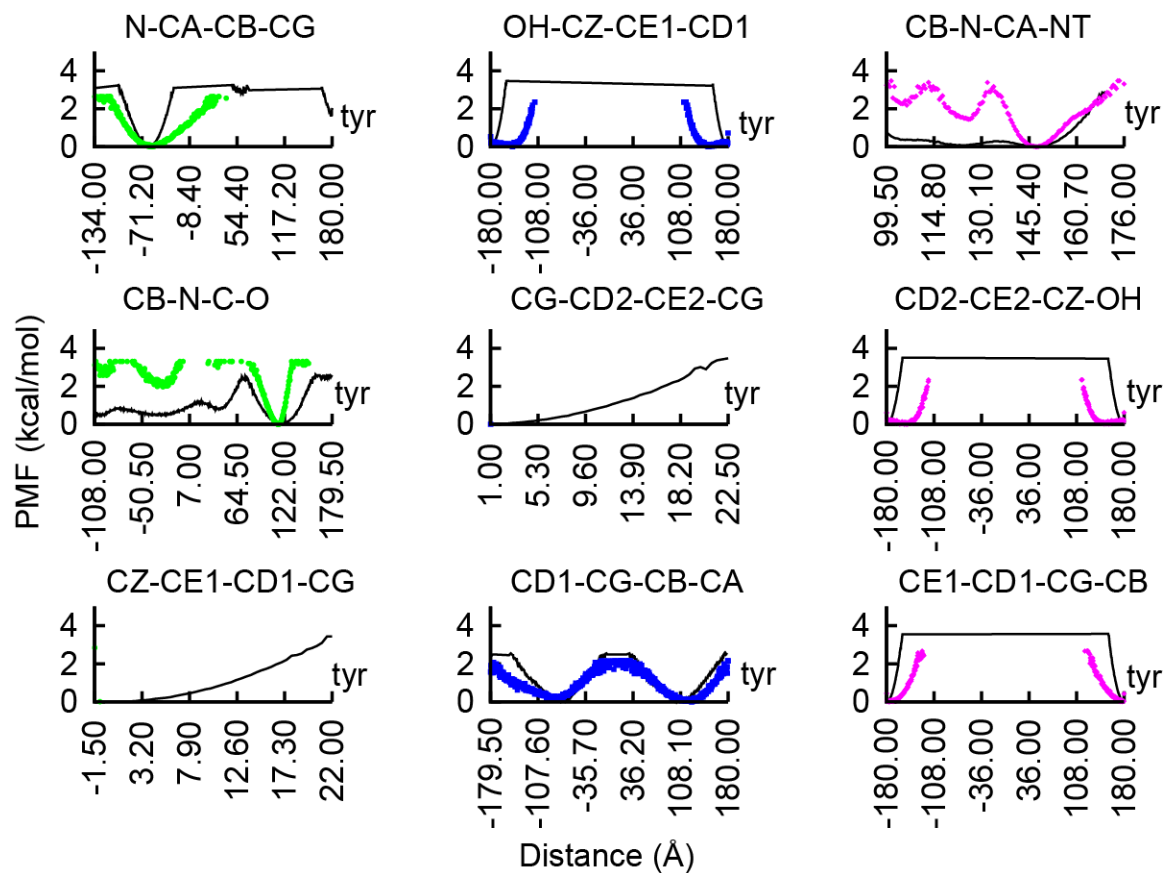

Figure S5: See page S75.

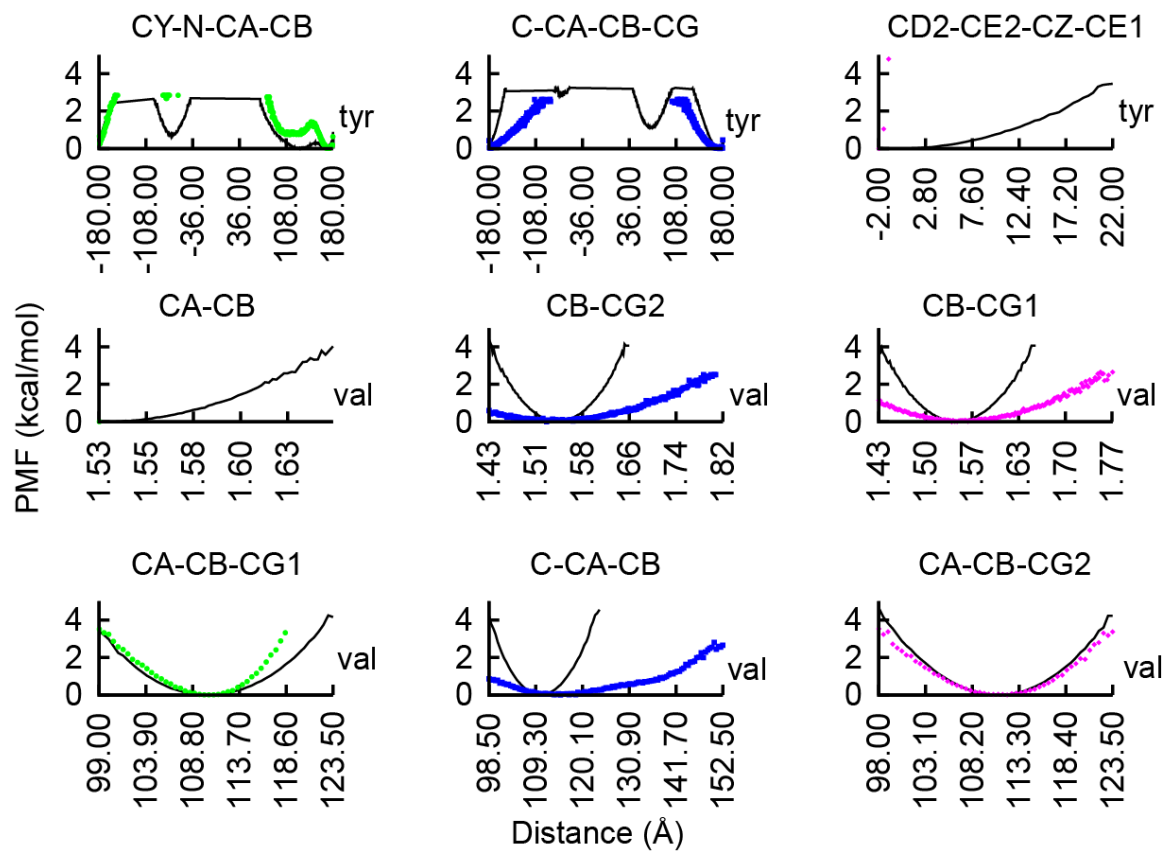

Figure S5: See page S75.

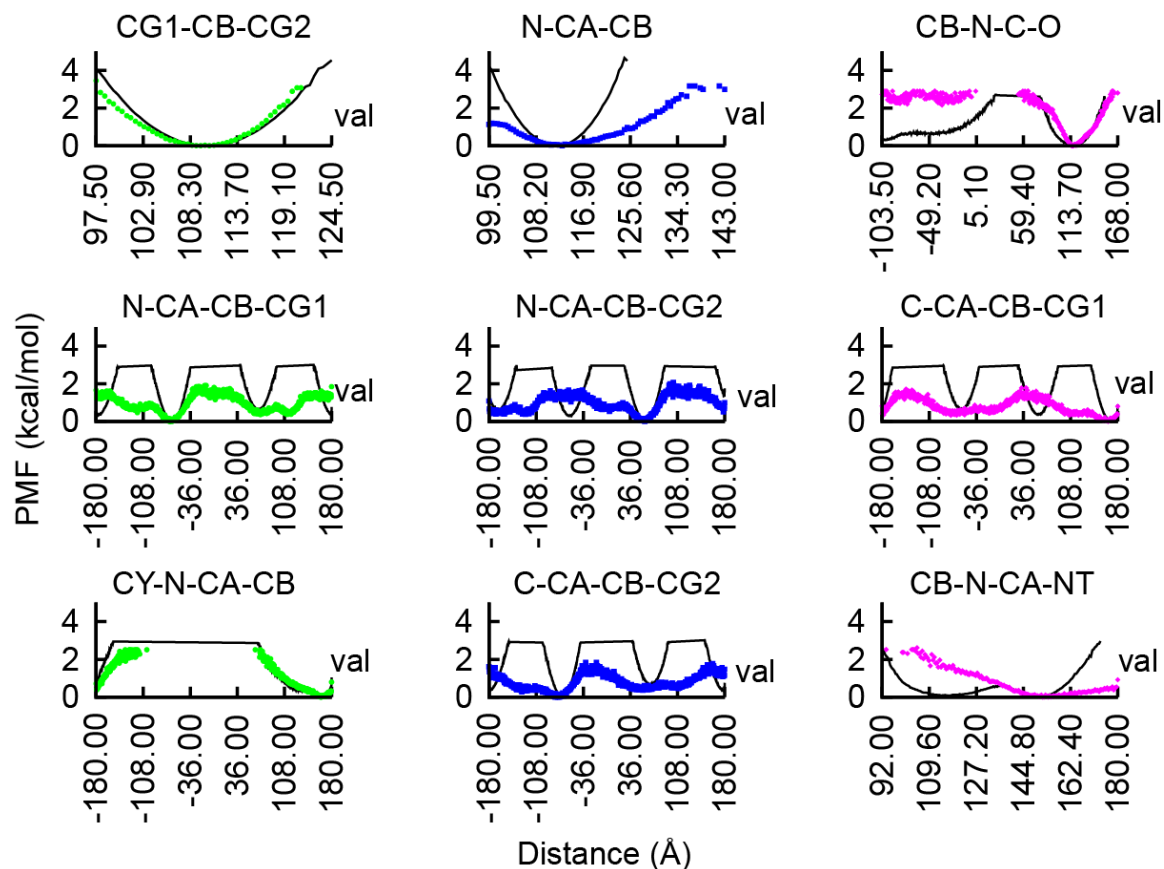

Figure S5: Comparison of distribution of internal degrees of freedom (bonds, angles, and dihedrals) from PRIMO AXA simulations (color) with the CHARMM explicit dipeptide simulations (black). Here, X can be any of 20 naturally occurring amino acids and is shown in the figure (bottom right).

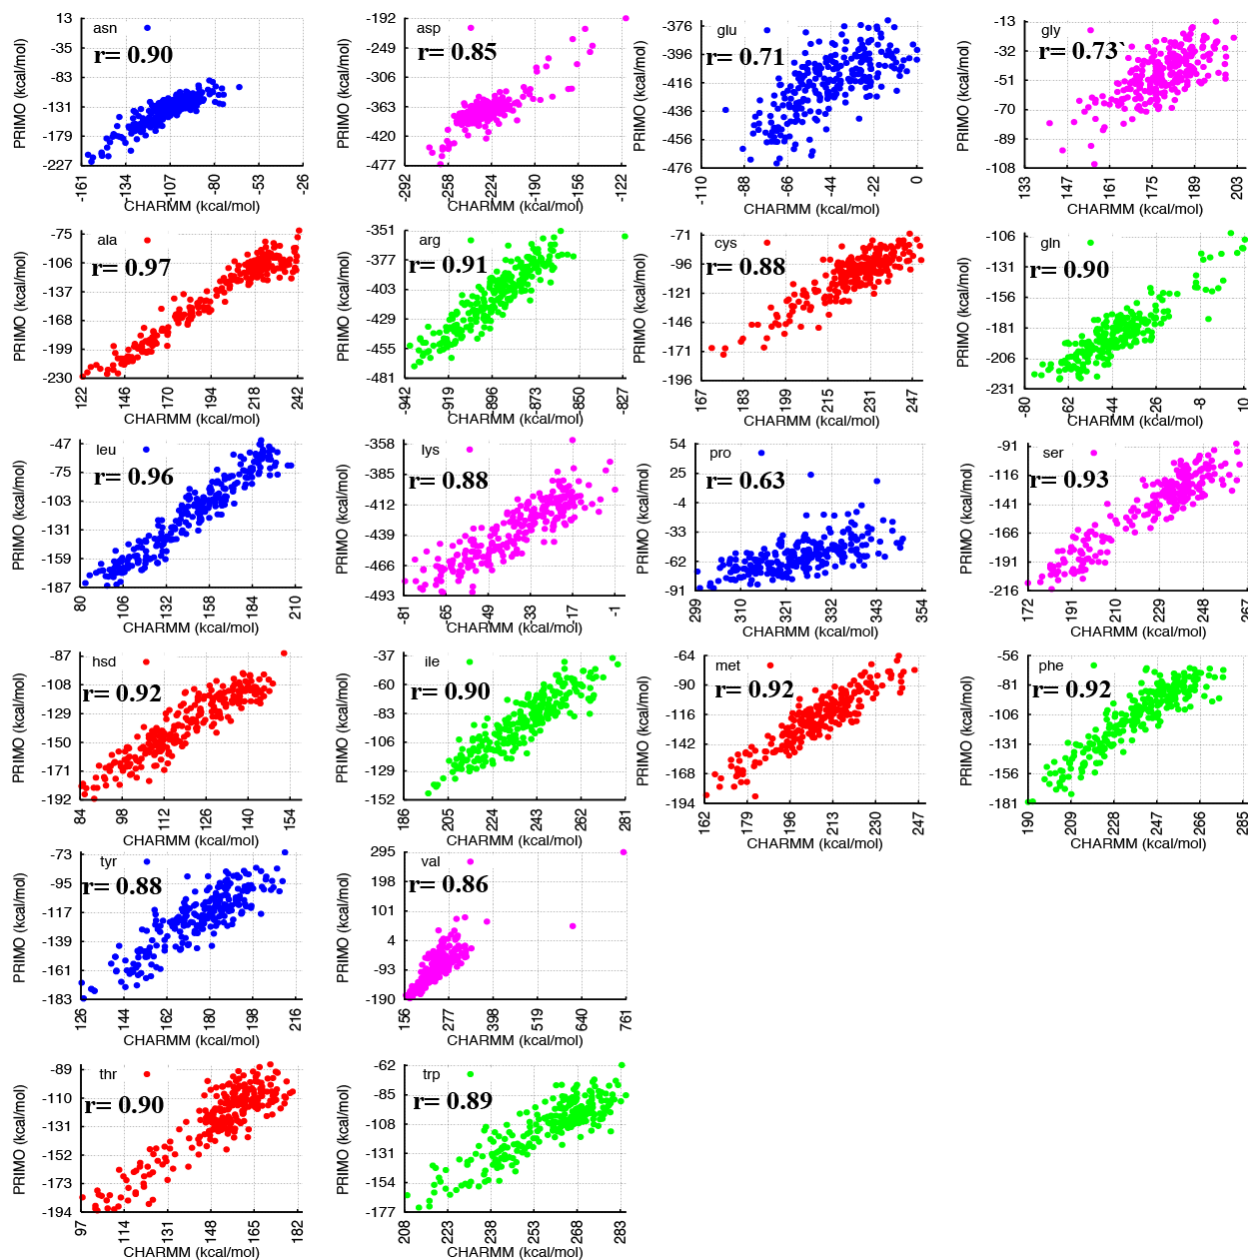

**Figure S6:** (color online) PRIMO versus CHARMM total energies for (AAXAA)<sub>4</sub> decoys with corresponding linear correlation coefficients  $r$ .



## $\phi/\psi$ Sampling in AXA Simulations

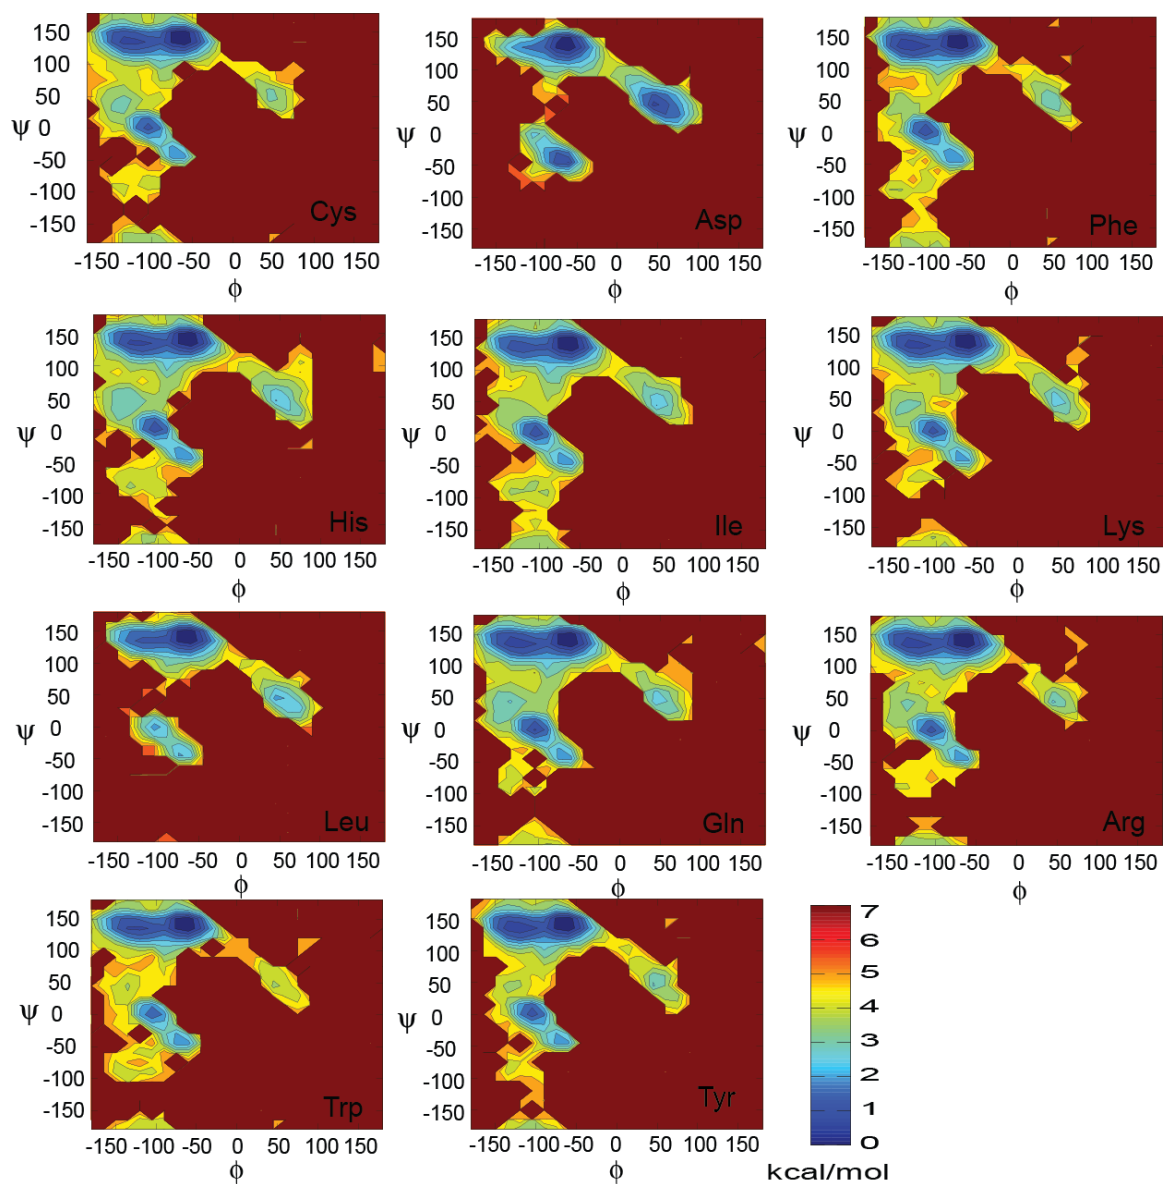

Figure S7: Potentials of mean force for the sampling of  $\phi/\psi$  backbone torsion angles in selected amino acid residues from AXA simulations. A color bar indicating energy levels is provided on the right.

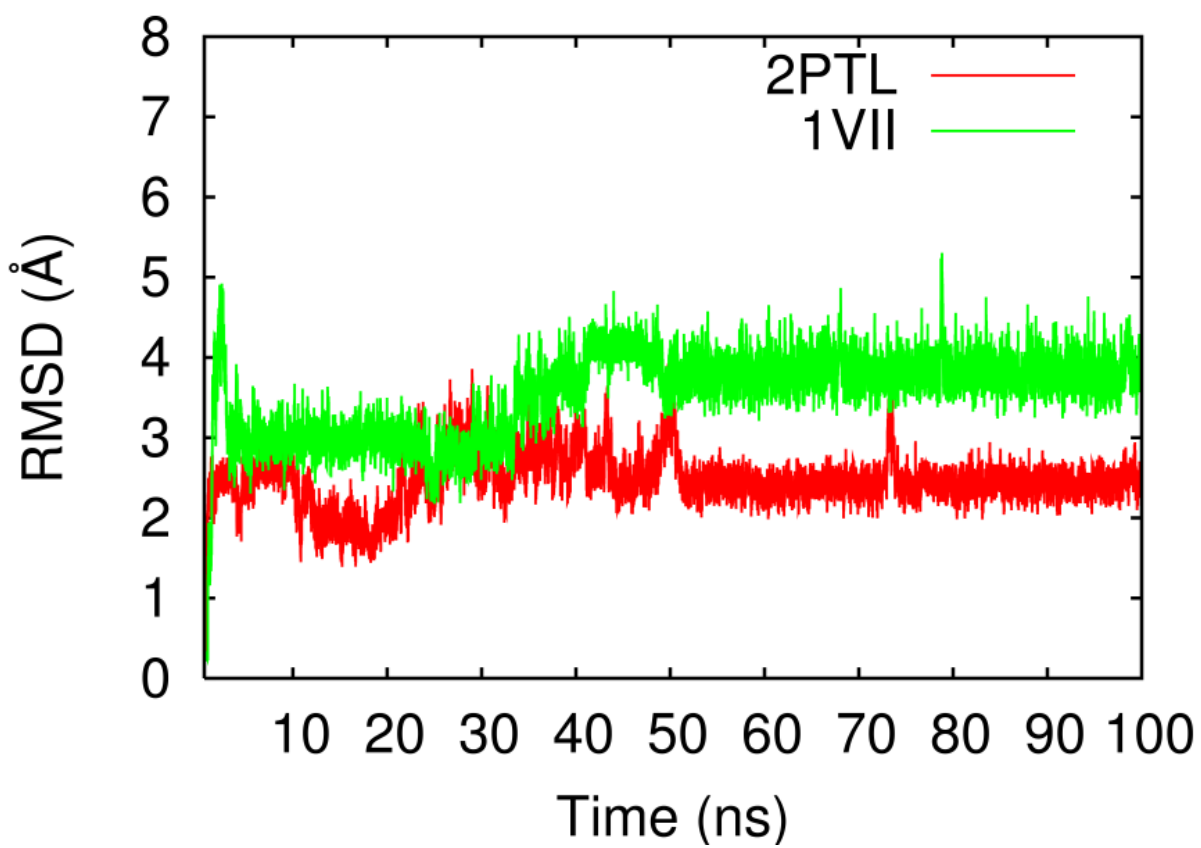

Figure S8: Time evolution of C $\alpha$  RMSD for 1VII and 2PTL.

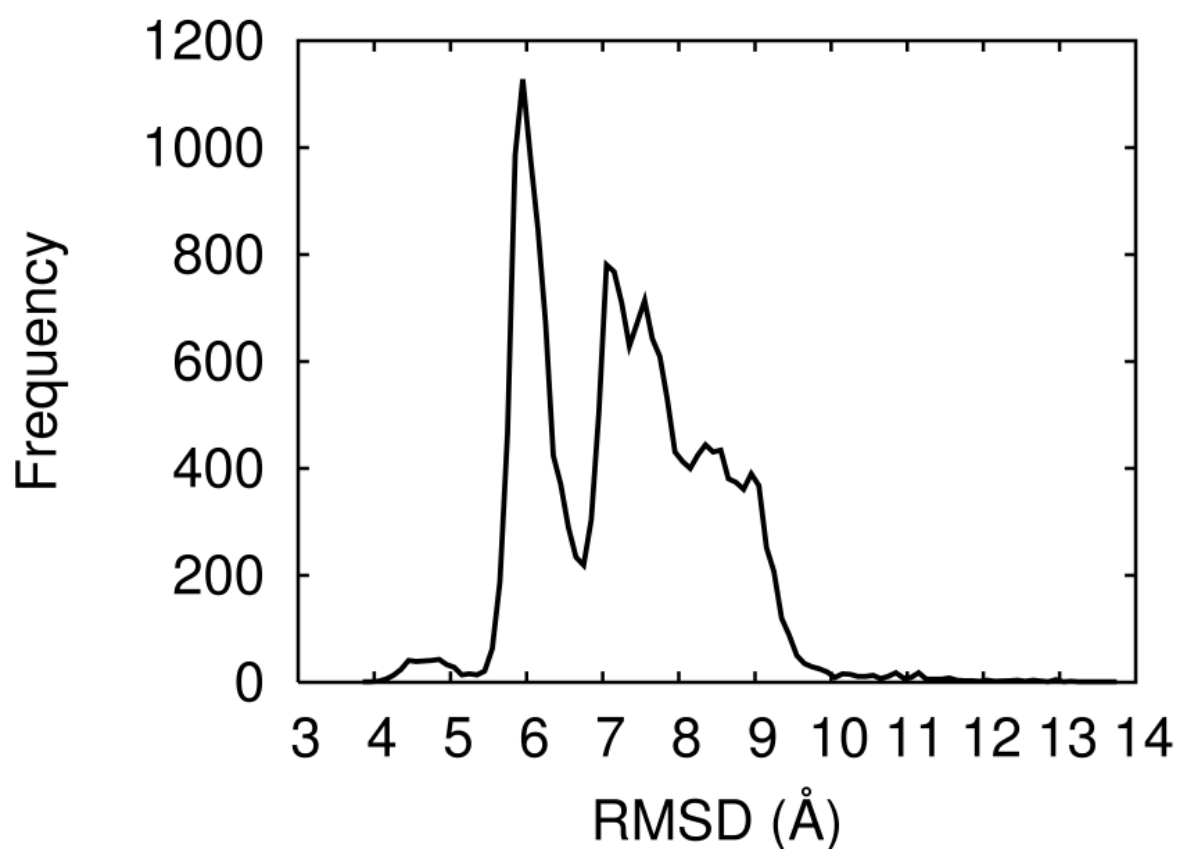

Figure S9: Distribution of backbone RMSD values for WW domain at 300 K in PRIMO REMD simulations.

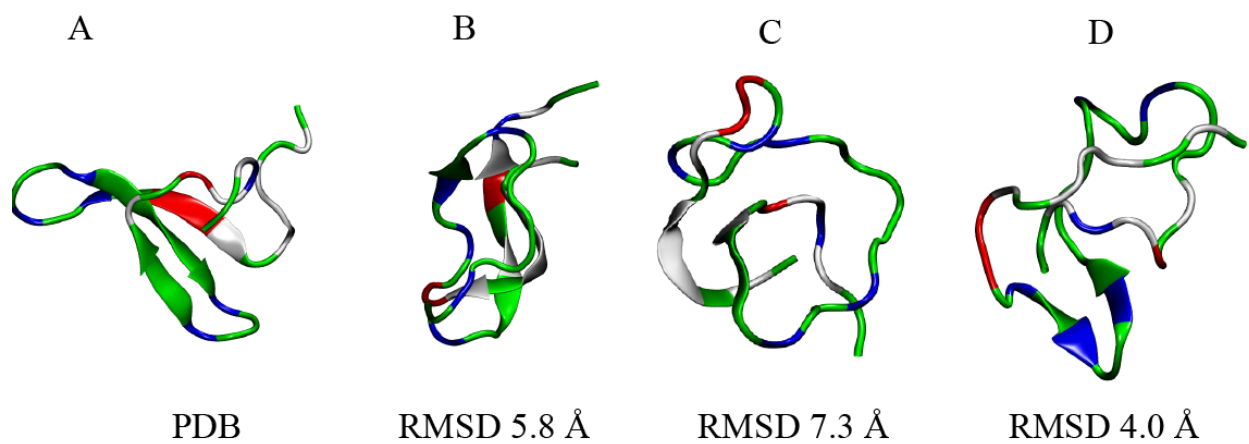

Figure S10: Representative structures from the REMD simulations of WW domain.

## REFERENCES

- (1) Gopal, S. M.; Mukherjee, S.; Yi Ming, C.; Feig, M. *Proteins* **2011**, 78, 1266-1281.
- (2) Cheng, Y-M.; Gopal, S. M.; Law, S.; Feig, M. *IEEE/ACM Transactions on Computational Biology and Bioinformatics* **2012**, 6, 476-486.
